# Supplementary material for: Synthesis of rare-earth metal complexes with a morpholine-functionalized β-diketiminato ligand and their catalytic activities towards C–O and C–N bond formation
Source: Royal Society of Chemistry journal article supplement (doi:10.1039/d2dt02053j), 2022-01-01
Supplement: d2dt02053j1.pdf [file d2dt02053j1.pdf]

## *Supporting Information*

### **Synthesis of rare-earth metal complexes with a morpholine-functionalized $\beta$ -diketiminato ligand and their catalytic activities towards C–O and C–N bond formation**

Xiancui Zhu,<sup>\*a</sup> Jinqiang He,<sup>a</sup> Yuanqing Yang,<sup>a</sup> Shuangliu Zhou,<sup>\*a</sup> Yun Wei,<sup>a</sup> Shaowu Wang<sup>a,b</sup>

<sup>a</sup>Key Laboratory of Functional Molecular Solids, Ministry of Education, Anhui Laboratory of Molecule-Based Materials, College of Chemistry and Materials Science, Anhui Normal University, Wuhu, Anhui 241002 (China)

<sup>b</sup>Anhui Laboratory of Clean Catalytic Engineering, Anhui Laboratory of Functional Complexes for Materials Chemistry and Application, College of Chemical and Environmental Engineering, Anhui Polytechnic University, Wuhu, Anhui 241000 (China)

#### **Table of contents**

|                                                                                                                      |     |
|----------------------------------------------------------------------------------------------------------------------|-----|
| 1. Crystallographic data of complexes.....                                                                           | S2  |
| Table S1. Crystallographic data for <b>1a-1c</b> .....                                                               | S2  |
| Table S2. Crystallographic data for <b>2a-2c</b> and <b>5a</b> .....                                                 | S3  |
| 2. Characterization data for thiocarbamates and $\beta$ -amino alcohols.....                                         | S4  |
| 3. Copies of NMR Spectra.....                                                                                        | S15 |
| Figs. S1-S2 Copies of the ligand.....                                                                                | S15 |
| Figs. S3-S12 Copies of rare-earth metal complexes.....                                                               | S16 |
| Figs. S13-S68 Copies of thiocarbamates.....                                                                          | S21 |
| Figs. S69-S96 Copies of $\beta$ -amino alcohols.....                                                                 | S49 |
| 4. Figs. S97-S98 <sup>1</sup> H NMR (500 MHz, C <sub>6</sub> D <sub>6</sub> ) monitoring the catalytic reaction..... | S63 |
| 5. References.....                                                                                                   | S64 |

**Table S1. Crystallographic data of complexes 1a-c**

|                                                                                      | <b>1a (Y)</b>                                                                     | <b>1b (Yb)</b>                                                                     | <b>1c (Lu)</b>                                                                     |
|--------------------------------------------------------------------------------------|-----------------------------------------------------------------------------------|------------------------------------------------------------------------------------|------------------------------------------------------------------------------------|
| CCDC                                                                                 | 2181769                                                                           | 2181770                                                                            | 2181771                                                                            |
| Empirical formula                                                                    | C <sub>31</sub> H <sub>52</sub> Cl <sub>3</sub> LiN <sub>3</sub> O <sub>3</sub> Y | C <sub>31</sub> H <sub>52</sub> Cl <sub>3</sub> LiN <sub>3</sub> O <sub>3</sub> Yb | C <sub>31</sub> H <sub>52</sub> Cl <sub>3</sub> LiN <sub>3</sub> O <sub>3</sub> Lu |
| Formula weight                                                                       | 717.98                                                                            | 801.08                                                                             | 803.01                                                                             |
| Crystal system                                                                       | Triclinic                                                                         | Triclinic                                                                          | Triclinic                                                                          |
| Space group                                                                          | <i>P</i> $\bar{1}$                                                                | <i>P</i> $\bar{1}$                                                                 | <i>P</i> $\bar{1}$                                                                 |
| <i>a</i> (Å)                                                                         | 11.0084(8)                                                                        | 10.9753(17)                                                                        | 10.896(8)                                                                          |
| <i>b</i> (Å)                                                                         | 11.5337(8)                                                                        | 11.5275(16)                                                                        | 11.454(7)                                                                          |
| <i>c</i> (Å)                                                                         | 17.1823(11)                                                                       | 17.147(3)                                                                          | 17.044(10)                                                                         |
| $\alpha$ (°)                                                                         | 103.679(2)                                                                        | 103.943(5)                                                                         | 103.77(3)                                                                          |
| $\beta$ (°)                                                                          | 94.344(2)                                                                         | 94.042(6)                                                                          | 94.20(3)                                                                           |
| $\gamma$ (°)                                                                         | 116.617(2)                                                                        | 116.603(5)                                                                         | 117.04(3)                                                                          |
| <i>V</i> (Å <sup>3</sup> )                                                           | 1853.2(2)                                                                         | 1842.3(5)                                                                          | 1799(2)                                                                            |
| <i>Z</i>                                                                             | 2                                                                                 | 2                                                                                  | 2                                                                                  |
| <i>D</i> <sub>calcd</sub> (mg m <sup>-3</sup> )                                      | 1.2848                                                                            | 1.444                                                                              | 1.482                                                                              |
| $\mu$ (mm <sup>-1</sup> )                                                            | 1.839                                                                             | 2.788                                                                              | 2.999                                                                              |
| <i>F</i> (000)                                                                       | 747                                                                               | 814                                                                                | 816                                                                                |
| $\theta$ range (°)                                                                   | 2.92 to 27.59                                                                     | 3.138 to 27.484                                                                    | 2.946 to 27.886                                                                    |
| Reflections collected                                                                | 75295                                                                             | 23047                                                                              | 75464                                                                              |
| Data/restraints/parameters                                                           | 8492/82/431                                                                       | 7900/192/422                                                                       | 8400/548/431                                                                       |
| Goodness-of-fit on F <sup>2</sup>                                                    | 1.0916                                                                            | 1.076                                                                              | 1.146                                                                              |
| R(int)                                                                               | 0.0604                                                                            | 0.0381                                                                             | 0.0388                                                                             |
| <i>R</i> <sub>1</sub> , <i>wR</i> <sub>2</sub> ( <i>I</i> > 2 $\sigma$ ( <i>I</i> )) | 0.0511, 0.1002                                                                    | 0.0373, 0.0741                                                                     | 0.0261, 0.0617                                                                     |
| Largest diff peak/hole (e Å <sup>-3</sup> )                                          | 0.7432 and -0.9134                                                                | 1.351 and -1.181                                                                   | 0.654 and -1.045                                                                   |

**Table S2. Crystallographic data of complexes 2a-c and 5a**

|                                                                             | <b>2a (Y)</b>                                                     | <b>2b (Yb)</b>                                                     | <b>2c (Lu)</b>                                                     | <b>5a (Y)</b>                                       |
|-----------------------------------------------------------------------------|-------------------------------------------------------------------|--------------------------------------------------------------------|--------------------------------------------------------------------|-----------------------------------------------------|
| CCDC                                                                        | 2181772                                                           | 2181773                                                            | 2181774                                                            | 2181775                                             |
| Empirical formula                                                           | C <sub>31</sub> H <sub>58</sub> N <sub>3</sub> OSi <sub>2</sub> Y | C <sub>31</sub> H <sub>58</sub> N <sub>3</sub> OSi <sub>2</sub> Yb | C <sub>31</sub> H <sub>58</sub> N <sub>3</sub> OSi <sub>2</sub> Lu | C <sub>39</sub> H <sub>65</sub> N <sub>4</sub> OSiY |
| Formula weight                                                              | 633.89                                                            | 718.02                                                             | 719.95                                                             | 722.95                                              |
| Crystal system                                                              | Monoclinic                                                        | Monoclinic                                                         | Monoclinic                                                         | Triclinic                                           |
| Space group                                                                 | <i>P2<sub>1</sub>/n</i>                                           | <i>P2<sub>1</sub>/c</i>                                            | <i>P2<sub>1</sub>/c</i>                                            | <i>P<math>\bar{1}</math></i>                        |
| <i>a</i> (Å)                                                                | 11.519(2)                                                         | 11.5135(6)                                                         | 11.5104(10)                                                        | 11.1438(11)                                         |
| <i>b</i> (Å)                                                                | 17.466(3)                                                         | 17.4563(10)                                                        | 17.4656(15)                                                        | 11.2147(12)                                         |
| <i>c</i> (Å)                                                                | 19.217(4)                                                         | 19.1193(10)                                                        | 19.0773(16)                                                        | 21.504(2)                                           |
| $\alpha$ (°)                                                                | 90                                                                | 90.00                                                              | 90                                                                 | 86.101(2)                                           |
| $\beta$ (°)                                                                 | 99.326(3)                                                         | 99.0470(10)                                                        | 98.9440(10)                                                        | 84.965(2)                                           |
| $\gamma$ (°)                                                                | 90                                                                | 90.00                                                              | 90                                                                 | 69.8760(10)                                         |
| <i>V</i> (Å <sup>3</sup> )                                                  | 3815.2(12)                                                        | 3794.9(4)                                                          | 3788.6(6)                                                          | 2511.6(4)                                           |
| Z                                                                           | 4                                                                 | 4                                                                  | 4                                                                  | 2                                                   |
| <i>D</i> <sub>calcd</sub> (mg m <sup>-3</sup> )                             | 1.104                                                             | 1.257                                                              | 1.262                                                              | 0.956                                               |
| $\mu$ (mm <sup>-1</sup> )                                                   | 1.615                                                             | 2.551                                                              | 2.693                                                              | 1.211                                               |
| <i>F</i> (000)                                                              | 1360                                                              | 1484                                                               | 1488                                                               | 776                                                 |
| $\theta$ range (°)                                                          | 1.585 to 25.000                                                   | 1.589 to 27.487                                                    | 1.590 to 27.499                                                    | 1.903 to 27.480                                     |
| Reflections collected                                                       | 27593                                                             | 33002                                                              | 32809                                                              | 22403                                               |
| Data/restraints/parameters                                                  | 6733/201/425                                                      | 8678/171/425                                                       | 8668/105/386                                                       | 11332/49/428                                        |
| Goodness-of-fit on F <sup>2</sup>                                           | 1.049                                                             | 1.012                                                              | 1.050                                                              | 0.964                                               |
| R(int)                                                                      | 0.1611                                                            | 0.0437                                                             | 0.0557                                                             | 0.1144                                              |
| <i>R</i> <sub>1</sub> , <i>wR</i> <sub>2</sub> ( <i>I</i> > 2σ( <i>I</i> )) | 0.0722, 0.1703                                                    | 0.0343, 0.0733                                                     | 0.0434, 0.1174                                                     | 0.0722, 0.1830                                      |
| Largest diff peak/hole (e Å <sup>-3</sup> )                                 | 0.883 and -0.730                                                  | 0.831 and -0.749                                                   | 1.337 and -1.524                                                   | 0.688 and -0.718                                    |

### Data of thiocarbamates

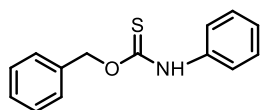

White solid.<sup>1</sup> M.P.: 78–80 °C. <sup>1</sup>H NMR (500 MHz, DMSO-*d*<sub>6</sub>, ppm, 20 °C): δ 11.28 (br, 1H, *NH*), 7.74 (s, 1H, *ArH*), 7.39–7.20 (m, 9H, *ArH*), 5.64 (s, 1H, *CH*<sub>2</sub>), 5.56 (s, 1H, *CH*<sub>2</sub>). <sup>13</sup>C NMR (125 MHz, DMSO-*d*<sub>6</sub>, ppm, 20 °C): δ 188.3, 187.9 (*C=S*), 139.5, 138.5, 136.8, 136.5, 129.6, 129.3, 129.1, 126.0, 125.7, 123.8, 122.8 (*ArC*), 73.0, 71.3 (*CH*<sub>2</sub>). <sup>1</sup>H NMR (500 MHz, DMSO-*d*<sub>6</sub>, ppm, 60 °C): δ 11.10 (br, 1H, *NH*), 7.48–7.37 (m, 9H, *ArH*), 7.19 (d, *J* = 6.5 Hz, 1H, *ArH*), 5.62 (s, 2H, *CH*<sub>2</sub>). <sup>13</sup>C NMR (125 MHz, DMSO-*d*<sub>6</sub>, ppm, 60 °C): δ 188.4 (*C=S*), 139.1, 136.7, 129.4, 129.2, 128.9, 125.8, 123.3 (*ArC*), 72.1 (*CH*<sub>2</sub>). HRMS (ESI): *m/z* calcd. for C<sub>14</sub>H<sub>13</sub>NOS [M+H]<sup>+</sup>: 244.0791, found: 244.0801.

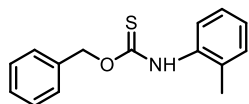

Light yellow solid. M.P.: 79–81 °C. <sup>1</sup>H NMR (400 MHz, DMSO-*d*<sub>6</sub>, ppm, 20 °C): δ 10.90, 10.79 (br, 1H, *NH*), 7.52–7.21 (m, 9H, *ArH*), 5.57 (s, 2H, *CH*<sub>2</sub>), 2.24, 2.20 (s, 3H, *CH*<sub>3</sub>). <sup>13</sup>C NMR (100 MHz, DMSO-*d*<sub>6</sub>, ppm, 20 °C): δ 190.1 (*C=S*), 137.6, 136.6, 135.1, 130.8, 128.9, 128.6, 128.4, 128.0, 127.5, 126.7 (*ArC*), 71.9, 71.3 (*CH*<sub>2</sub>), 18.0 (*CH*<sub>3</sub>). HRMS (ESI): *m/z* calcd. for C<sub>15</sub>H<sub>15</sub>NOS [M+H]<sup>+</sup>: 258.0947, found: 258.0948.

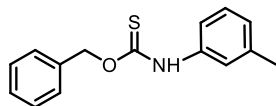

White solid. M.P.: 77–79 °C. <sup>1</sup>H NMR (400 MHz, DMSO-*d*<sub>6</sub>, ppm, 20 °C): δ 11.18 (br, 1H, *NH*), 7.49–7.37 (m, 6H, *ArH*), 7.18 (s, 2H, *ArH*), 6.98 (s, 1H, *ArH*), 5.60 (s, 1H, *CH*<sub>2</sub>), 5.54 (s, 1H, *CH*<sub>2</sub>), 2.31, 2.26 (s, 3H, *CH*<sub>3</sub>). <sup>13</sup>C NMR (100 MHz, DMSO-*d*<sub>6</sub>, ppm, 20 °C): δ 187.5 (*C=S*), 139.0, 138.4, 138.2, 136.4, 136.0, 128.9, 128.6, 126.2, 125.9, 123.9, 123.0, 120.6, 119.5 (*ArC*), 72.7, 70.8 (*CH*<sub>2</sub>), 21.5 (*CH*<sub>3</sub>). HRMS (APCI): *m/z* calcd. for C<sub>15</sub>H<sub>15</sub>NOS [M+H]<sup>+</sup>: 258.0947, found: 258.0941.

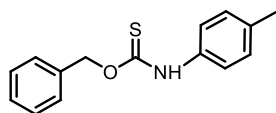

White solid. M.P.: 76–78 °C. <sup>1</sup>H NMR (400 MHz, DMSO-*d*<sub>6</sub>, ppm, 20 °C): δ 11.15 (br, 1H, *NH*), 7.57–7.43 (m, 6H, *ArH*), 7.21–7.13 (m, 3H, *ArH*), 5.61 (s, 1H, *CH*<sub>2</sub>), 5.52 (s, 1H, *CH*<sub>2</sub>), 2.31, 2.27 (s, 3H, *CH*<sub>3</sub>). <sup>13</sup>C NMR (100 MHz, DMSO-*d*<sub>6</sub>, ppm, 20 °C): δ 187.9, 187.3 (*C=S*), 136.5, 136.1, 135.6, 134.8, 134.5, 129.3, 128.9, 128.8, 128.6,

128.5, 123.54, 122.4 (ArC), 72.6, 70.8 (CH<sub>2</sub>), 20.9 (CH<sub>3</sub>). HRMS (ESI): *m/z* calcd. for C<sub>15</sub>H<sub>15</sub>NOS [M+H]<sup>+</sup>: 258.0947, found: 258.0942.

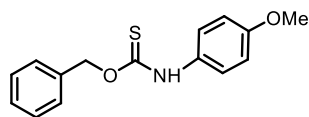

White solid. M.P.: 76–77 °C. <sup>1</sup>H NMR (400 MHz, DMSO-*d*<sub>6</sub>, ppm, 20 °C): δ 11.11, 11.07 (br, 1H, NH), 7.55 (d, *J* = 8.8 Hz, 1H, ArH), 7.51 (d, *J* = 7.2 Hz, 1H, ArH), 7.46–7.39 (m, 4H, ArH), 7.27 (d, *J* = 8.8 Hz, 1H, ArH), 6.96 (d, *J* = 8.8 Hz, 1H, ArH), 6.89 (d, *J* = 8.8 Hz, 1H, ArH), 5.61 (s, 1H, CH<sub>2</sub>), 5.53 (s, 1H, CH<sub>2</sub>), 3.78, 3.74 (s, 3H, CH<sub>3</sub>). <sup>13</sup>C NMR (100 MHz, DMSO-*d*<sub>6</sub>, ppm, 20 °C): δ 188.3, 187.2 (C=S), 157.2, 156.9, 136.5, 136.2, 131.9, 131.1, 128.9, 128.8, 128.6, 128.4, 125.3, 124.1, 114.4, 114.1 (ArC), 72.4, 70.9 (CH<sub>2</sub>), 55.7 (OCH<sub>3</sub>). HRMS (ESI): *m/z* calcd. for C<sub>15</sub>H<sub>15</sub>NO<sub>2</sub>S [M+H]<sup>+</sup>: 274.0896, found: 274.0890.

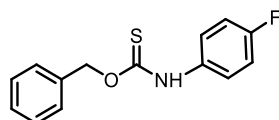

White solid. M.P.: 85–87 °C. <sup>1</sup>H NMR (400 MHz, DMSO-*d*<sub>6</sub>, ppm, 20 °C): δ 11.26 (br, 1H, NH), 7.70 (s, 1H, ArH), 7.50–7.40 (m, 6H, ArH), 7.23–7.21 (m, 2H, ArH), 5.62 (s, 1H, CH<sub>2</sub>), 5.53 (s, 1H, CH<sub>2</sub>). <sup>13</sup>C NMR (100 MHz, DMSO-*d*<sub>6</sub>, ppm, 20 °C): δ 188.4 (C=S), 159.6 (d, <sup>1</sup>*J*<sub>F-C</sub> = 259.0 Hz), 136.4, 136.0, 135.4, 134.5, 129.0, 128.7, 128.5, 125.6 (d, <sup>3</sup>*J*<sub>F-C</sub> = 7.0 Hz), 124.6, 124.5, 116.1, 115.6 (d, <sup>2</sup>*J*<sub>F-C</sub> = 21.0 Hz), 72.6, 71.1 (CH<sub>2</sub>). HRMS (APCI): *m/z* calcd. for C<sub>14</sub>H<sub>12</sub>FNOS [M+H]<sup>+</sup>: 262.0696, found: 262.0697.

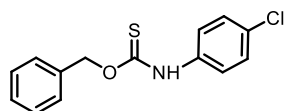

White solid. M.P.: 99–101 °C. <sup>1</sup>H NMR (400 MHz, DMSO-*d*<sub>6</sub>, ppm, 20 °C): δ 11.35 (br, 1H, NH), 7.77 (s, 1H, ArH), 7.44–7.39 (m, 8H, ArH), 5.62 (s, 1H, CH<sub>2</sub>), 5.54 (s, 1H, CH<sub>2</sub>). <sup>13</sup>C NMR (100 MHz, DMSO-*d*<sub>6</sub>, ppm, 20 °C): δ 187.8 (C=S), 138.0, 137.0, 136.1, 136.0, 129.0, 128.7, 124.7, 124.0 (ArC), 72.8, 71.1 (CH<sub>2</sub>). HRMS (ESI): *m/z* calcd. for C<sub>14</sub>H<sub>12</sub>ClNOS [M+H]<sup>+</sup>: 278.0401, found: 278.0404.

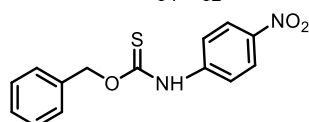

Yellow solid. M.P.: 144–146 °C. <sup>1</sup>H NMR (400 MHz, DMSO-*d*<sub>6</sub>, ppm, 20 °C): δ 11.80 (br, 1H, NH), 8.24 (d, *J* = 8.8 Hz, 2H, ArH), 7.91 (s, 2H, ArH), 7.52 (d, *J* = 6.8 Hz, 2H, ArH), 7.47–7.39 (m, 3H, ArH), 5.62 (s, 2H, CH<sub>2</sub>). <sup>13</sup>C NMR (100 MHz,

DMSO-*d*<sub>6</sub>, ppm, 20 °C): δ 187.8 (C=S), 144.6, 143.5, 135.7, 129.0, 129.0, 128.9, 125.0, 121.6 (ArC), 72.3 (CH<sub>2</sub>). HRMS (APCI): *m/z* calcd. for C<sub>14</sub>H<sub>12</sub>N<sub>2</sub>O<sub>3</sub>S [M+H]<sup>+</sup>: 289.0641, found: 289.0646.

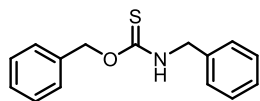

White solid. M.P.: 67–69 °C. <sup>1</sup>H NMR (400 MHz, DMSO-*d*<sub>6</sub>, ppm, 20 °C): δ 9.85 (br, 1H, NH), 7.47–7.23 (m, 10H, ArH), 5.50 (s, 2H, CH<sub>2</sub>), 4.70 (d, *J* = 5.6 Hz, 1H, CH<sub>2</sub>), 4.38 (d, *J* = 5.6 Hz, 1H, CH<sub>2</sub>). <sup>13</sup>C NMR (101 MHz, DMSO-*d*<sub>6</sub>, ppm, 20 °C): δ 190.5 (C=S), 138.6, 138.3, 136.7, 128.8, 128.8, 128.7, 128.5, 128.4, 128.0, 127.8, 127.7, 127.5 (ArC), 71.7, 71.1 (CH<sub>2</sub>), 48.4, 46.2 (CH<sub>2</sub>). HRMS (ESI): *m/z* calcd. for C<sub>15</sub>H<sub>15</sub>NOS [M+H]<sup>+</sup>: 258.0947, found: 258.0957.

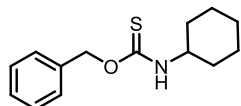

Yellow solid. M.P.: 64–66 °C. <sup>1</sup>H NMR (400 MHz, DMSO-*d*<sub>6</sub>, ppm, 20 °C): δ 9.20 (d, *J* = 8.4 Hz, 1H, NH), 7.40–7.33 (m, 5H, ArH), 5.50 (s, 1H, CH<sub>2</sub>), 5.40 (s, 1H, CH<sub>2</sub>), 3.93–3.82 (m, 1H, CyH), 1.88 (d, *J* = 10.0 Hz, 2H, CyH), 1.77–1.51 (m, 3H, CyH), 1.27–1.04 (m, 5H, CyH). <sup>13</sup>C NMR (100 MHz, DMSO-*d*<sub>6</sub>, ppm, 20 °C): δ 188.3, 187.3 (C=S), 136.8, 128.9, 128.8, 128.6, 128.4, 128.3, 127.9 (ArC), 71.3, 70.6 (OCH<sub>2</sub>), 54.4, 52.4 (NCH), 32.4, 31.7, 25.5, 25.4, 25.1, 25.0 (CH<sub>2</sub>). HRMS (APCI): *m/z* calcd. for C<sub>14</sub>H<sub>19</sub>NOS [M+H]<sup>+</sup>: 250.1260, found: 250.1265.

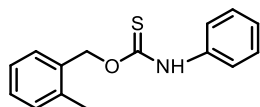

White solid. M.P.: 96–98 °C. <sup>1</sup>H NMR (400 MHz, DMSO-*d*<sub>6</sub>, ppm, 20 °C): δ 11.24 (br, 1H, NH), 7.73 (s, 1H, ArH), 7.46–7.29 (m, 8H, ArH), 5.63 (s, 1H, CH<sub>2</sub>), 5.53 (s, 1H, CH<sub>2</sub>), 2.37 (s, 3H, CH<sub>3</sub>). <sup>13</sup>C NMR (100 MHz, DMSO-*d*<sub>6</sub>, ppm, 20 °C): δ 187.8 (C=S), 139.1, 137.3, 134.4, 130.6, 129.8, 129.0, 126.3, 125.4, 123.2, 122.3 (ArC), 71.2, 69.6 (CH<sub>2</sub>), 19.0 (CH<sub>3</sub>). HRMS (ESI): *m/z* calcd. for C<sub>15</sub>H<sub>15</sub>NOS [M+H]<sup>+</sup>: 258.0947, found: 258.0952.

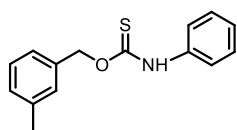

White solid. M.P.: 78–80 °C. <sup>1</sup>H NMR (400 MHz, DMSO-*d*<sub>6</sub>, ppm, 20 °C): δ 11.24 (br, 1H, NH), 7.72 (s, 1H, ArH), 7.36–7.20 (m, 8H, ArH), 5.59 (s, 1H, CH<sub>2</sub>), 5.50 (s, 1H,

$\text{CH}_2$ ), 2.35 (s, 3H,  $\text{CH}_3$ ).  $^{13}\text{C}$  NMR (100 MHz,  $\text{DMSO-}d_6$ , ppm, 20 °C):  $\delta$  187.9 (C=S), 139.1, 138.1, 136.2, 136.0, 129.3, 128.8, 125.9, 125.5, 123.3, 122.4 (ArC), 72.6, 70.9 ( $\text{CH}_2$ ), 21.4 ( $\text{CH}_3$ ). HRMS (ESI):  $m/z$  calcd. for  $\text{C}_{15}\text{H}_{15}\text{NOS}$   $[\text{M}+\text{H}]^+$ : 258.0947, found: 258.0941.

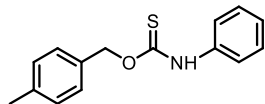

White solid. M.P.: 130–132 °C.  $^1\text{H}$  NMR (400 MHz,  $\text{DMSO-}d_6$ , ppm, 20 °C):  $\delta$  11.22 (br, 1H, NH), 7.70 (s, 1H, ArH), 7.35 (s, 5H, ArH), 7.24–7.23 (m, 3H, ArH), 5.57 (s, 1H,  $\text{CH}_2$ ), 5.49 (s, 1H,  $\text{CH}_2$ ), 2.34 (s, 3H,  $\text{CH}_3$ ).  $^{13}\text{C}$  NMR (100 MHz,  $\text{DMSO-}d_6$ , ppm, 20 °C):  $\delta$  187.6 (C=S), 139.1, 138.1, 133.3, 129.5, 128.9, 125.2, 123.4, 122.3 (ArC), 72.7, 70.9 ( $\text{CH}_2$ ), 21.3 ( $\text{CH}_3$ ). HRMS (ESI):  $m/z$  calcd. for  $\text{C}_{15}\text{H}_{15}\text{NOS}$   $[\text{M}+\text{H}]^+$ : 258.0947, found: 258.0938.

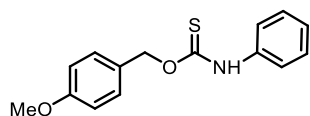

White solid. M.P.: 110–112 °C.  $^1\text{H}$  NMR (400 MHz,  $\text{DMSO-}d_6$ , ppm, 20 °C):  $\delta$  11.18 (br, 1H, NH), 7.69 (s, 1H, ArH), 7.43–7.17 (s, 6H, ArH), 6.98 (d,  $J = 7.6$  Hz, 2H, ArH), 5.54 (s, 1H,  $\text{CH}_2$ ), 5.46 (s, 1H,  $\text{CH}_2$ ), 3.79 (s, 3H,  $\text{CH}_3$ ).  $^{13}\text{C}$  NMR (100 MHz,  $\text{DMSO-}d_6$ , ppm, 20 °C):  $\delta$  188.0 (C=S), 159.8, 138.2, 130.7, 129.2, 127.9, 125.2, 123.4, 122.2, 114.3 (ArC), 72.7, 71.0 ( $\text{CH}_2$ ), 55.6 ( $\text{OCH}_3$ ). HRMS (APCI):  $m/z$  calcd. for  $\text{C}_{15}\text{H}_{15}\text{NO}_2\text{S}$   $[\text{M}+\text{H}]^+$ : 274.0896, found: 274.0888.

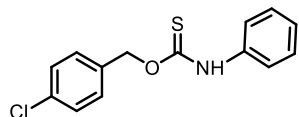

White solid. M.P.: 117–119 °C.  $^1\text{H}$  NMR (400 MHz,  $\text{DMSO-}d_6$ , ppm, 20 °C):  $\delta$  11.28 (br, 1H, NH), 7.70 (s, 1H, ArH), 7.49 (s, 4H, ArH), 7.35 (s, 3H, ArH), 7.18 (s, 1H, ArH), 5.61 (s, 1H,  $\text{CH}_2$ ), 5.54 (s, 1H,  $\text{CH}_2$ ).  $^{13}\text{C}$  NMR (100 MHz,  $\text{DMSO-}d_6$ , ppm, 20 °C)  $\delta$  187.8 (C=S), 139.0, 135.5, 133.3, 130.5, 129.3, 129.0, 125.6, 123.4, 122.5 (ArC), 71.7, 69.9 ( $\text{CH}_2$ ). HRMS (APCI):  $m/z$  calcd. for  $\text{C}_{14}\text{H}_{12}\text{ClNOS}$   $[\text{M}+\text{H}]^+$ : 278.0401, found: 278.0407.

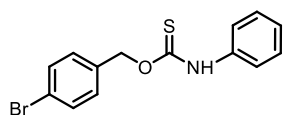

White solid. M.P.: 122–124 °C.  $^1\text{H}$  NMR (400 MHz,  $\text{DMSO-}d_6$ , ppm, 20 °C):  $\delta$  11.25 (br, 1H, NH), 7.67–7.59 (m, 3H, ArH), 7.43–7.32 (m, 5H, ArH), 7.16 (s, 1H, ArH), 5.56 (s, 1H,  $\text{CH}_2$ ), 5.49 (s, 1H,  $\text{CH}_2$ ).  $^{13}\text{C}$  NMR (100 MHz,  $\text{DMSO-}d_6$ , ppm, 20 °C):  $\delta$

187.8 (C=S), 139.0, 138.0, 136.0, 135.5, 131.9, 130.9, 129.3, 129.0, 125.6, 125.4, 123.4, 122.5, 121.9 (ArC), 71.7, 69.9 (CH<sub>2</sub>). HRMS (APCI): *m/z* calcd. for C<sub>14</sub>H<sub>12</sub>BrNOS [M+H]<sup>+</sup>: 321.9896, found: 321.9903.

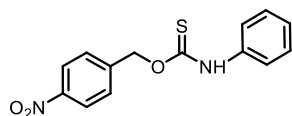

White solid. M.P.: 136–138 °C. <sup>1</sup>H NMR (400 MHz, DMSO-*d*<sub>6</sub>, ppm, 20 °C): δ 11.39 (br, 1H, NH), 8.29 (s, 2H, ArH), 7.75–7.70 (m, 3H, ArH), 7.39 (s, 3H, ArH), 7.20 (s, 1H, ArH), 5.77 (s, 1H, CH<sub>2</sub>), 5.71 (s, 1H, CH<sub>2</sub>). <sup>13</sup>C NMR (100 MHz, DMSO-*d*<sub>6</sub>, ppm, 20 °C): δ 187.6 (C=S), 147.5, 144.5, 138.9, 129.0, 125.7, 124.0, 123.4, 122.7 (ArC), 71.0, 69.2 (CH<sub>2</sub>). HRMS (ESI): *m/z* calcd. for C<sub>14</sub>H<sub>12</sub>N<sub>2</sub>O<sub>3</sub>S [M+H]<sup>+</sup>: 289.0641, found: 289.0645.

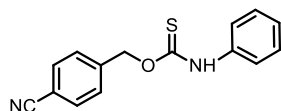

White solid. M.P.: 149–151 °C. <sup>1</sup>H NMR (400 MHz, DMSO-*d*<sub>6</sub>, ppm, 20 °C): δ 11.39 (br, 1H, NH), 7.91 (s, 2H, ArH), 7.70–7.61 (m, 3H, ArH), 7.37–7.20 (m, 4H, ArH), 5.72 (s, 1H, CH<sub>2</sub>), 5.64 (s, 1H, CH<sub>2</sub>). <sup>13</sup>C NMR (100 MHz, DMSO-*d*<sub>6</sub>, ppm, 20 °C): δ 187.2 (C=S), 142.3, 141.9, 138.9, 137.9, 132.9, 129.3, 128.9, 125.7, 123.3, 122.6, 119.1, 111.1 (ArC), 71.3, 69.5 (OCH<sub>2</sub>). HRMS (ESI): *m/z* calcd. for C<sub>15</sub>H<sub>12</sub>N<sub>2</sub>OS [M+H]<sup>+</sup>: 269.0743, found: 269.0747.

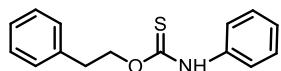

White solid.<sup>1</sup> M.P.: 86–88 °C. <sup>1</sup>H NMR (400 MHz, DMSO-*d*<sub>6</sub>, ppm, 20 °C): δ 11.10 (br, 1H, NH), 7.67 (s, 1H, ArH), 7.34–7.26 (m, 7H, ArH), 7.18 (s, 2H, ArH), 4.73 (s, 2H, CH<sub>2</sub>), 3.08 (t, *J* = 6.4 Hz, 2H, CH<sub>2</sub>). <sup>13</sup>C NMR (100 MHz, DMSO-*d*<sub>6</sub>, ppm, 20 °C): δ 187.6 (C=S), 138.4, 129.4, 129.1, 128.9, 126.9, 125.1, 123.6, 122.2 (ArC), 72.3 (OCH<sub>2</sub>), 34.6 (CH<sub>2</sub>). HRMS (ESI): *m/z* calcd. for C<sub>15</sub>H<sub>15</sub>NOS [M+H]<sup>+</sup>: 258.0947, found: 258.0955.

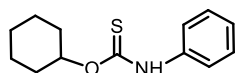

Yellow solid.<sup>1</sup> M.P.: 78–80 °C. <sup>1</sup>H NMR (400 MHz, DMSO-*d*<sub>6</sub>, ppm, 20 °C): δ 11.00 (br, 1H, NH), 7.65 (s, 1H, ArH), 7.34 (s, 3H, ArH), 7.14 (s, 1H, ArH), 5.34 (s, 1H, OCH), 1.94 (s, 2H, CyH), 1.72–1.29 (m, 8H, CyH). <sup>13</sup>C NMR (100 MHz, DMSO-*d*<sub>6</sub>, ppm, 20 °C): δ 186.8 (C=S), 138.2, 129.2, 125.0, 122.2 (ArC), 79.8 (OCH), 31.6, 31.1, 25.3, 23.5 (CyC). HRMS (APCI): *m/z* calcd. for C<sub>13</sub>H<sub>17</sub>NOS [M+H]<sup>+</sup>: 236.1104, found: 236.1102.



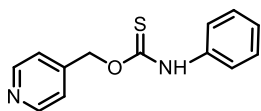

Light yellow solid. M.P.: 144–146 °C.  $^1\text{H}$  NMR (400 MHz, DMSO- $d_6$ , ppm, 20 °C):  $\delta$  11.39 (br, 1H, NH), 8.61 (s, 2H, PydH), 7.71 (s, 1H, PydH), 7.47–7.40 (m, 5H, ArH), 7.22 (s, 1H, PydH), 5.68 (s, 1H, CH<sub>2</sub>), 5.61 (s, 1H, CH<sub>2</sub>).  $^{13}\text{C}$  NMR (100 MHz, DMSO- $d_6$ , ppm, 20 °C):  $\delta$  187.3 (C=S), 150.2, 145.7, 137.9, 129.4, 129.0, 125.8, 123.4, 122.8, 122.4 (ArC), 70.5, 68.7 (CH<sub>2</sub>). HRMS (APCI):  $m/z$  calcd. for C<sub>13</sub>H<sub>12</sub>N<sub>2</sub>OS [M+H]<sup>+</sup>: 245.0743, found: 245.0738.

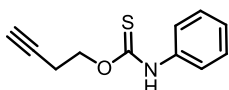

Yellow oil.  $^1\text{H}$  NMR (400 MHz, DMSO- $d_6$ , ppm, 20 °C):  $\delta$  11.23 (br, 1H, NH), 7.67 (s, 1H, ArH), 7.45–7.37 (m, 3H, ArH), 7.17 (s, 1H, ArH), 4.57 (s, 2H, OCH<sub>2</sub>), 2.98 (t,  $J$  = 6.4 Hz, 1H, CH), 2.68 (dt,  $J$  = 2.8, 6.4 Hz, 2H, CH<sub>2</sub>).  $^{13}\text{C}$  NMR (100 MHz, DMSO- $d_6$ , ppm, 20 °C):  $\delta$  187.2 (C=S), 138.1, 129.2, 125.1, 123.5, 122.1 (ArC), 81.4 (C≡CH), 73.1 (C≡CH), 69.4, 67.4 (OCH<sub>2</sub>), 18.7 (CH<sub>2</sub>). HRMS (ESI):  $m/z$  calcd. for C<sub>11</sub>H<sub>11</sub>NOS [M+H]<sup>+</sup>: 206.0634, found: 206.0625.

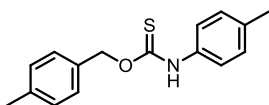

White solid. M.P.: 108–110 °C.  $^1\text{H}$  NMR (400 MHz, DMSO- $d_6$ , ppm, 20 °C):  $\delta$  11.14 (br, 1H, NH), 7.58 (d,  $J$  = 6.0 Hz, 1H, ArH), 7.38–7.33 (m, 2H, ArH), 7.23–7.12 (m, 5H, ArH), 5.57 (s, 1H, CH<sub>2</sub>), 5.48 (s, 1H, CH<sub>2</sub>), 2.34 (s, 3H, CH<sub>3</sub>), 2.27 (s, 3H, CH<sub>3</sub>).  $^{13}\text{C}$  NMR (100 MHz, DMSO- $d_6$ , ppm, 20 °C):  $\delta$  187.9, 187.3 (C=S), 138.0, 135.6, 134.4, 133.0, 129.6, 129.4, 129.3, 128.9, 128.7, 123.4, 122.3 (ArC), 72.5, 70.7 (CH<sub>2</sub>), 21.2 (CH<sub>3</sub>), 20.9 (CH<sub>3</sub>). HRMS (ESI):  $m/z$  calcd. for C<sub>16</sub>H<sub>17</sub>NOS [M+H]<sup>+</sup>: 272.1104, found: 272.1098.

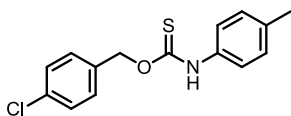

White solid. M.P.: 130–132 °C.  $^1\text{H}$  NMR (400 MHz, DMSO- $d_6$ , ppm, 20 °C):  $\delta$  11.20 (br, 1H, NH), 7.58–7.47 (m, 5H, ArH), 7.24–7.14 (m, 3H, ArH), 5.60 (s, 1H, CH<sub>2</sub>), 5.53 (s, 1H, CH<sub>2</sub>), 2.31, 2.27 (s, 3H, CH<sub>3</sub>).  $^{13}\text{C}$  NMR (100 MHz, DMSO- $d_6$ , ppm, 20 °C):  $\delta$  187.7 (C=S), 136.4, 135.9, 135.6, 135.1, 134.9, 134.6, 133.6, 133.2, 132.6, 130.5, 130.4, 129.6, 129.3, 128.9, 123.4, 122.4 (ArC), 71.5, 69.7 (CH<sub>2</sub>), 20.9 (CH<sub>3</sub>). HRMS (ESI):  $m/z$  calcd. for C<sub>15</sub>H<sub>14</sub>ClNOS [M+H]<sup>+</sup>: 292.0557, found: 292.0562.

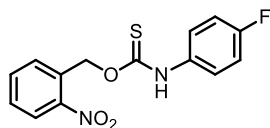

Light yellow solid. M.P.: 114–116 °C.  $^1\text{H}$  NMR (400 MHz, DMSO- $d_6$ , ppm, 20 °C):  $\delta$  11.41 (br, 1H, NH), 8.20–8.16 (m, 1H, ArH), 7.87–7.59 (m, 4H, ArH), 7.39 (s, 1H, ArH), 7.24 (d,  $J = 8.4$  Hz, 2H, ArH), 5.93 (s, 1H, CH<sub>2</sub>), 5.90 (s, 1H, CH<sub>2</sub>).  $^{13}\text{C}$  NMR (100 MHz, DMSO- $d_6$ , ppm, 20 °C):  $\delta$  187.9, 187.1 (C=S), 159.8 (d,  $^1J_{\text{F-C}} = 242.0$  Hz), 147.7, 135.2, 134.6, 134.2, 132.4, 131.7, 129.8, 129.7, 125.5 (d,  $^3J_{\text{F-C}} = 8.0$  Hz), 125.0, 116.1, 115.6 (d,  $^2J_{\text{F-C}} = 21.0$  Hz), 69.2, 67.2 (CH<sub>2</sub>). HRMS (ESI):  $m/z$  calcd. for C<sub>14</sub>H<sub>11</sub>FN<sub>2</sub>O<sub>3</sub>S [M+H]<sup>+</sup>: 307.0547, found: 307.0549.

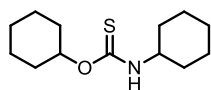

White solid. M.P.: 106–108 °C.  $^1\text{H}$  NMR (400 MHz, DMSO- $d_6$ , ppm, 20 °C):  $\delta$  8.97–8.92 (m, 1H, NH), 5.26–5.13 (m, 1H, OCH), 3.89–3.54 (m, 1H, NHCH), 1.91–1.51 (m, 10H, CyH), 1.36–1.05 (m, 10H, CyH).  $^{13}\text{C}$  NMR (125 MHz, DMSO- $d_6$ , ppm, 20 °C):  $\delta$  188.0 (C=S), 78.0, 77.4 (OCH), 54.4, 52.7 (NCH), 32.7, 32.3, 32.2, 31.6, 25.9, 25.7, 25.6, 25.5, 24.3, 23.8 (CyC). HRMS (ESI):  $m/z$  calcd. for C<sub>13</sub>H<sub>23</sub>NOS [M+H]<sup>+</sup>: 242.1573, found: 242.1567.

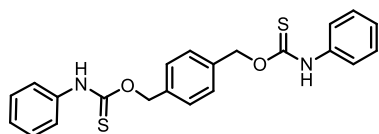

White solid. M.P.: 187–189 °C.  $^1\text{H}$  NMR (400 MHz, DMSO- $d_6$ , ppm, 20 °C):  $\delta$  11.26 (br, 2H, NH), 7.71 (s, 2H, ArH), 7.52–7.36 (m, 10H, ArH), 7.18 (s, 2H, ArH), 5.63 (s, 2H, CH<sub>2</sub>), 5.55 (s, 2H, CH<sub>2</sub>).  $^{13}\text{C}$  NMR (100 MHz, DMSO- $d_6$ , ppm, 20 °C):  $\delta$  187.8 (C=S), 138.9, 137.9, 136.0, 128.9, 125.5, 123.3, 122.5 (ArC), 72.2, 70.5 (CH<sub>2</sub>). HRMS (ESI):  $m/z$  calcd. for C<sub>22</sub>H<sub>20</sub>N<sub>2</sub>O<sub>2</sub>S<sub>2</sub> [M+H]<sup>+</sup>: 409.1039, found: 409.1032.

#### Data of $\beta$ -amino alcohols

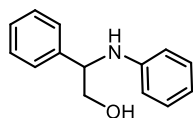

Yellow oil.<sup>2</sup>  $^1\text{H}$  NMR (400 MHz, CDCl<sub>3</sub>, ppm, 20 °C):  $\delta$  7.38–7.32 (m, 4H, ArH), 7.29–7.27 (m, 1H, ArH), 7.10 (t,  $J = 8.0$  Hz, 2H, ArH), 6.69 (t,  $J = 7.6$  Hz, 1H, ArH), 6.58 (dd,  $J = 8.4, 0.8$  Hz, 2H, ArH), 4.52 (dd,  $J = 4.0, 6.4$  Hz, 1H, CH), 3.95 (d,  $J = 10.4$  Hz, 1H, CH<sub>2</sub>), 3.76 (t,  $J = 8.0$  Hz, 1H, CH<sub>2</sub>), 1.73 (br, 1H, NH).  $^{13}\text{C}$  NMR (100

MHz, CDCl<sub>3</sub>, ppm, 20 °C):  $\delta$  147.3, 140.2, 129.2, 128.8, 127.6, 126.8, 117.9, 113.9 (ArC), 67.3 (CHOH), 59.9 (CH<sub>2</sub>NH). HRMS (ESI):  $m/z$  calcd. for C<sub>14</sub>H<sub>15</sub>NO [M+H]<sup>+</sup>: 214.1226, found: 214.1225.

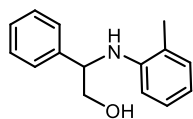

White solid. M.p.: 79–81 °C. <sup>1</sup>H NMR (400 MHz, CDCl<sub>3</sub>, ppm, 20 °C):  $\delta$  7.38–7.27 (m, 5H, ArH), 7.10 (d,  $J$  = 7.2 Hz, 1H, ArH), 6.98 (t,  $J$  = 7.6 Hz, 1H, ArH), 6.67 (t,  $J$  = 7.2 Hz, 1H, ArH), 6.40 (d,  $J$  = 8.0 Hz, 1H, ArH), 4.56 (dd,  $J$  = 4.0, 6.4 Hz, 1H, CH), 4.42 (br, 1H, OH), 3.99–3.97 (m, 1H, CH<sub>2</sub>), 3.81–3.80 (m, 1H, CH<sub>2</sub>), 2.31 (s, 3H, CH<sub>3</sub>), 1.88 (br, 1H, NH). <sup>13</sup>C NMR (100 MHz, CDCl<sub>3</sub>, ppm, 20 °C):  $\delta$  145.1, 140.2, 130.1, 128.8, 127.6, 127.0, 126.7, 122.6, 117.5, 111.5 (ArC), 67.5 (CHOH), 59.8 (CH<sub>2</sub>NH), 17.7 (Me). HRMS (ESI):  $m/z$  calcd. for C<sub>15</sub>H<sub>17</sub>NO [M+H]<sup>+</sup>: 228.1383, found: 228.1386.

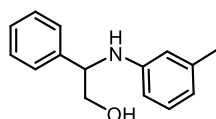

Yellow oil. <sup>1</sup>H NMR (400 MHz, CDCl<sub>3</sub>, ppm, 20 °C):  $\delta$  7.38–7.32 (m, 4H, ArH), 7.29–7.27 (m, 1H, ArH), 6.99 (t,  $J$  = 7.6 Hz, 1H, ArH), 6.51 (d,  $J$  = 7.2 Hz, 1H, ArH), 6.44 (s, 1H, ArH), 6.37 (dd,  $J$  = 8.0, 2.0 Hz, 1H, ArH), 4.51 (dd,  $J$  = 4.4, 6.8 Hz, 1H, CH), 3.94 (dd,  $J$  = 4.0, 11.2 Hz, 1H, CH<sub>2</sub>), 3.76 (dd,  $J$  = 6.8, 11.2, Hz, 1H, CH<sub>2</sub>), 2.22 (s, 3H, CH<sub>3</sub>), 1.61 (br, 1H, NH). <sup>13</sup>C NMR (100 MHz, CDCl<sub>3</sub>, ppm, 20 °C):  $\delta$  147.2, 140.2, 138.9, 129.0, 128.8, 127.6, 126.7, 118.9, 114.7, 110.8 (ArC), 67.3 (CHOH), 59.8 (CH<sub>2</sub>NH), 21.6 (Me). HRMS (ESI):  $m/z$  calcd. for C<sub>15</sub>H<sub>17</sub>NO [M+H]<sup>+</sup>: 228.1383, found: 228.1384.

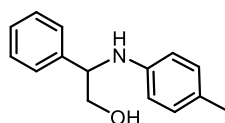

White solid. M.p.: 72–74 °C. <sup>1</sup>H NMR (400 MHz, CDCl<sub>3</sub>, ppm, 20 °C):  $\delta$  7.40–7.34 (m, 4H, ArH), 7.31–7.28 (m, 1H, ArH), 6.94 (d,  $J$  = 8.4 Hz, 2H, ArH), 6.53 (d,  $J$  = 8.4 Hz, 2H, ArH), 4.51 (dd,  $J$  = 4.0, 6.8 Hz, 1H, CH), 3.96 (dd,  $J$  = 4.0, 10.8 Hz, 1H, CH<sub>2</sub>), 3.76 (dd,  $J$  = 7.2, 11.2 Hz, 1H, CH<sub>2</sub>), 2.22 (s, 3H, Me), 1.85 (br, 1H, NH). <sup>13</sup>C NMR (100 MHz, CDCl<sub>3</sub>, ppm, 20 °C):  $\delta$  144.8, 140.2, 129.6, 128.8, 127.5, 127.1, 126.7, 114.0 (ArC), 67.4 (CHOH), 60.1 (CH<sub>2</sub>NH), 20.4 (Me). HRMS (ESI):  $m/z$  calcd. for C<sub>15</sub>H<sub>17</sub>NO [M+H]<sup>+</sup>: 228.1383, found: 228.1389.

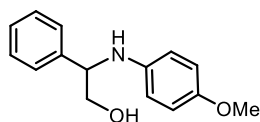

Yellow oil.<sup>2</sup> <sup>1</sup>H NMR (400 MHz, CDCl<sub>3</sub>, ppm, 20 °C): δ 7.35–7.31 (m, 4H, ArH), 7.28–7.26 (m, 1H, ArH), 6.70 (d, *J* = 8.8 Hz, 2H, ArH), 6.54 (d, *J* = 8.8 Hz, 2H, ArH), 4.43 (dd, *J* = 4.4, 7.6 Hz, 1H, CH), 3.92 (dd, *J* = 4.0, 11.2 Hz, 1H, CH<sub>2</sub>), 3.71 (dd, *J* = 7.6, 11.2 Hz, 1H, CH<sub>2</sub>), 3.69 (s, 3H, Me). <sup>13</sup>C NMR (100 MHz, CDCl<sub>3</sub>, ppm, 20 °C): δ 152.3, 141.3, 140.3, 128.8, 127.6, 126.7, 115.3, 114.7 (ArC), 67.3 (CHOH), 60.8 (CHNH), 55.7(OMe). HRMS (ESI): *m/z* calcd. for C<sub>15</sub>H<sub>17</sub>NO<sub>2</sub> [M+H]<sup>+</sup>: 244.1332, found: 244.1329.

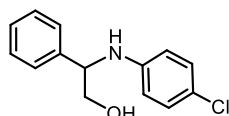

White solid. M.p.: 78–80 °C. <sup>1</sup>H NMR (400 MHz, CDCl<sub>3</sub>, ppm, 20 °C): δ 7.36–7.28 (m, 5H, ArH), 7.03 (d, *J* = 8.8 Hz, 2H, ArH), 6.47 (d, *J* = 8.8 Hz, 2H, ArH), 4.59 (br, 1H, OH), 4.45 (dd, *J* = 4.0, 6.8 Hz, 1H, CH), 3.94 (d, *J* = 10.8 Hz, 1H, CH<sub>2</sub>), 3.77–3.72 (m, 1H, CH<sub>2</sub>), 1.79 (br, 1H, NH). <sup>13</sup>C NMR (100 MHz, CDCl<sub>3</sub>, ppm, 20 °C): δ 145.7, 139.6, 129.0, 128.9, 127.8, 126.7, 122.4, 114.9 (ArC), 67.3 (CHOH), 59.9 (CH<sub>2</sub>NH). HRMS (ESI): *m/z* calcd. for C<sub>14</sub>H<sub>14</sub>NOCl [M+H]<sup>+</sup>: 248.0837, found: 248.0830.

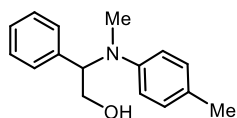

Yellow oil. <sup>1</sup>H NMR (400 MHz, CDCl<sub>3</sub>, ppm, 20 °C): δ 7.45–7.32 (m, 5H, ArH), 7.10 (d, *J* = 8.0 Hz, 2H, ArH), 6.81 (d, *J* = 8.0 Hz, 2H, ArH), 4.98 (dd, *J* = 4.4, 8.4 Hz, 1H, CH), 3.48–3.37 (m, 2H, CH<sub>2</sub>N), 2.93 (s, 3H, NMe), 2.71 (br, 1H, NH), 2.30 (s, 3H, Me). <sup>13</sup>C NMR (100 MHz, CDCl<sub>3</sub>, ppm, 20 °C): δ 148.1, 142.0, 129.8, 128.5, 127.7, 127.2, 125.9, 114.0 (ArC), 71.5 (CHOH), 62.6 (CH<sub>2</sub>N), 39.6 (NMe), 20.3 (Me). HRMS (ESI): *m/z* calcd. for C<sub>16</sub>H<sub>19</sub>NO [M+H]<sup>+</sup>: 242.1539, found: 242.1546.

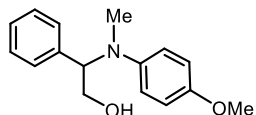

Yellow oil. <sup>1</sup>H NMR (400 MHz, CDCl<sub>3</sub>, ppm, 20 °C): δ 7.28–7.26 (m, 3H, ArH), 7.06–7.04 (m, 2H, ArH), 6.91–6.82 (m, 4H, ArH), 4.81 (dd, *J* = 5.2, 10.0 Hz, 1H, CH), 4.12 (t, *J* = 10.8 Hz, 1H, CH<sub>2</sub>N), 3.99 (s, 1H, CH<sub>2</sub>N), 3.78 (s, 3H, Me), 2.59 (s, 3H, NMe), 2.45 (br, 1H, NH). <sup>13</sup>C NMR (100 MHz, CDCl<sub>3</sub>, ppm, 20 °C): δ 153.4, 145.3, 136.8, 128.4, 127.6, 127.5, 118.3, 114.5 (ArC), 67.0 (CHOH), 61.2 (CHN), 55.6

(OMe), 32.9 (NMe). HRMS (ESI):  $m/z$  calcd. for  $C_{16}H_{19}NO_2$   $[M+H]^+$ : 258.1489, found: 258.1494.

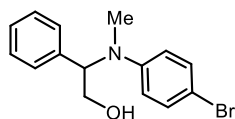

Yellow oil.  $^1H$  NMR (400 MHz,  $CDCl_3$ , ppm, 20 °C):  $\delta$  7.34–7.27 (m, 5H, ArH), 7.11 (d,  $J$  = 8.0 Hz, 2H, ArH), 6.78 (d,  $J$  = 8.4 Hz, 2H, ArH), 5.01 (t,  $J$  = 6.8 Hz, 1H, CH), 4.13–4.11 (m, 2H, CH<sub>2</sub>N), 2.71 (s, 3H, Me), 2.02 (br, 1H, NH).  $^{13}C$  NMR (100 MHz,  $CDCl_3$ , ppm, 20 °C):  $\delta$  150.1, 137.1, 131.9, 128.7, 127.8, 127.0, 116.2, 110.2 (ArC), 64.6 (CHOH), 61.7 (CHN), 32.2 (NMe). HRMS (ESI):  $m/z$  calcd. for  $C_{15}H_{16}NOBr$   $[M+H]^+$ : 306.0488, found: 306.0489.

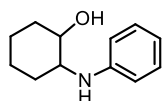

White solid.<sup>2</sup> M.p.: 57–59 °C.  $^1H$  NMR (400 MHz,  $CDCl_3$ , ppm, 20 °C):  $\delta$  7.20–7.16 (m, 2H, ArH), 6.76–6.71 (m, 3H, ArH), 3.35 (dt,  $J$  = 4.0, 9.6 Hz, 1H, CHOH), 3.18–3.11 (m, 1H, CHN), 2.76 (br, 1H, OH), 2.13–2.20 (m, 2H, CyH), 1.80–1.70 (m, 2H, CyH), 1.63 (br, 1H, NH), 1.45–1.01 (m, 4H, CyH).  $^{13}C$  NMR (100 MHz,  $CDCl_3$ , ppm, 20 °C):  $\delta$  147.8, 129.3, 118.4, 114.4 (ArC), 74.5 (CHOH), 60.1 (CHNH), 33.1, 31.6, 25.0, 24.2 (CyC). HRMS (ESI):  $m/z$  calcd. for  $C_{12}H_{17}NO$   $[M+H]^+$ : 192.1383, found: 192.1389.

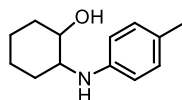

Yellow oil.<sup>3</sup>  $^1H$  NMR (400 MHz,  $CDCl_3$ , ppm, 20 °C):  $\delta$  7.00 (d,  $J$  = 8.0 Hz, 2H, ArH), 6.65 (d,  $J$  = 8.0 Hz, 2H, ArH), 3.33 (dt,  $J$  = 4.4, 9.6 Hz, 1H, CHOH), 3.12–3.06 (m, 1H, CHN), 2.95 (br, 1H, OH), 2.25 (s, 3H, Me), 2.13–2.09 (m, 2H, CyH), 1.79–1.69 (m, 2H, CyH), 1.44–1.27 (m, 3H, CyH), 1.07–0.97 (m, 1H, CyH).  $^{13}C$  NMR (100 MHz,  $CDCl_3$ , ppm, 20 °C):  $\delta$  145.5, 129.8, 127.6, 114.7 (ArC), 74.4 (CHOH), 60.6 (CHNH), 33.2, 31.5, 25.0, 24.3 (CyC), 20.4 (Me). HRMS (ESI):  $m/z$  calcd. for  $C_{13}H_{19}NO$   $[M+H]^+$ : 206.1539, found: 206.1540.

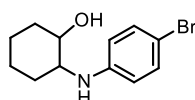

White solid.<sup>3</sup> M.p.: 124–126 °C.  $^1H$  NMR (400 MHz,  $CDCl_3$ , ppm, 20 °C):  $\delta$  7.25 (d,  $J$  = 8.8 Hz, 2H, ArH), 6.59 (d,  $J$  = 8.8 Hz, 2H, ArH), 3.38–3.32 (m, 2H, CHOH and CHN), 3.10–3.06 (m, 1H, CyH), 2.58 (br, 1H, OH), 2.12–2.06 (m, 2H, CyH), 1.61 (br,

1H, *NH*), 1.79–1.71 (m, 2H, *CyH*), 1.40–1.27 (m, 2H, *CyH*), 1.09–0.99 (m, 1H, *CyH*).  
<sup>13</sup>C NMR (100 MHz, CDCl<sub>3</sub>, ppm, 20 °C): δ 146.9, 132.0, 115.8, 109.8 (*ArC*), 74.5 (*CHOH*), 60.2 (*NHCH*), 33.2, 31.5, 24.9, 24.2 (*CyC*).

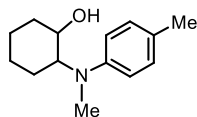

Yellow oil.<sup>4</sup> <sup>1</sup>H NMR (400 MHz, CDCl<sub>3</sub>, ppm, 20 °C): δ 7.08 (d, *J* = 8.4 Hz, 2H, *ArH*), 6.89 (d, *J* = 8.4 Hz, 2H, *ArH*), 3.65 (dt, *J* = 4.4, 10.4 Hz, 1H, *CHO*), 3.36–3.30 (m, 1H, *CHN*), 2.96 (s, 1H, *OH*), 2.74 (s, 3H, *NCH*<sub>3</sub>), 2.29 (s, 3H, *CH*<sub>3</sub>), 2.24–2.19 (m, 1H, *CyH*), 1.77–1.69 (m, 3H, *CyH*), 1.42–1.26 (m, 4H, *CyH*). <sup>13</sup>C NMR (100 MHz, CDCl<sub>3</sub>, ppm, 20 °C): δ 149.3, 129.6, 128.1, 116.3 (*ArC*), 69.9 (*COH*), 67.7 (*CHN*), 33.3, 31.3, 25.6, 25.5, 24.3, 20.3 (*CyC*).

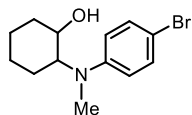

Yellow oil.<sup>5</sup> <sup>1</sup>H NMR (400 MHz, CDCl<sub>3</sub>, ppm, 20 °C): δ 7.29 (d, *J* = 9.2 Hz, 2H, *ArH*), 6.78 (d, *J* = 9.2 Hz, 2H, *ArH*), 3.65 (dt, *J* = 4.4, 10.0 Hz, 1H, *CHO*), 3.36–3.29 (m, 1H, *CHN*), 2.72 (s, 3H, *NCH*<sub>3</sub>), 2.63 (s, 1H, *OH*), 2.18–2.15 (m, 1H, *CyH*), 1.76–1.65 (m, 3H, *CyH*), 1.42–1.23 (m, 4H, *CyH*). <sup>13</sup>C NMR (100 MHz, CDCl<sub>3</sub>, ppm, 20 °C): δ 150.4, 131.7, 116.9, 110.2 (*ArC*), 70.7 (*COH*), 66.9 (*CHN*), 33.4, 31.1, 26.2, 25.4, 24.3 (*CyC*).

### Copies of the ligand

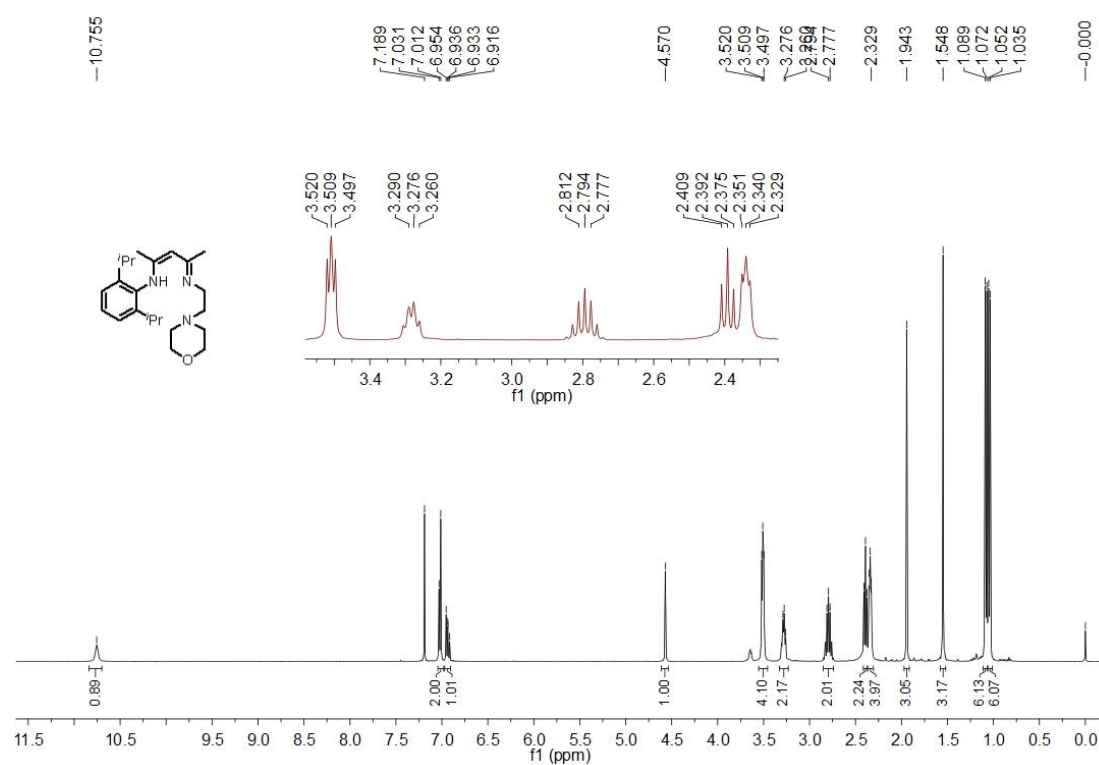

**Fig. S1.** <sup>1</sup>H NMR spectrum of **HL** (400 MHz, CDCl<sub>3</sub>, 20 °C)

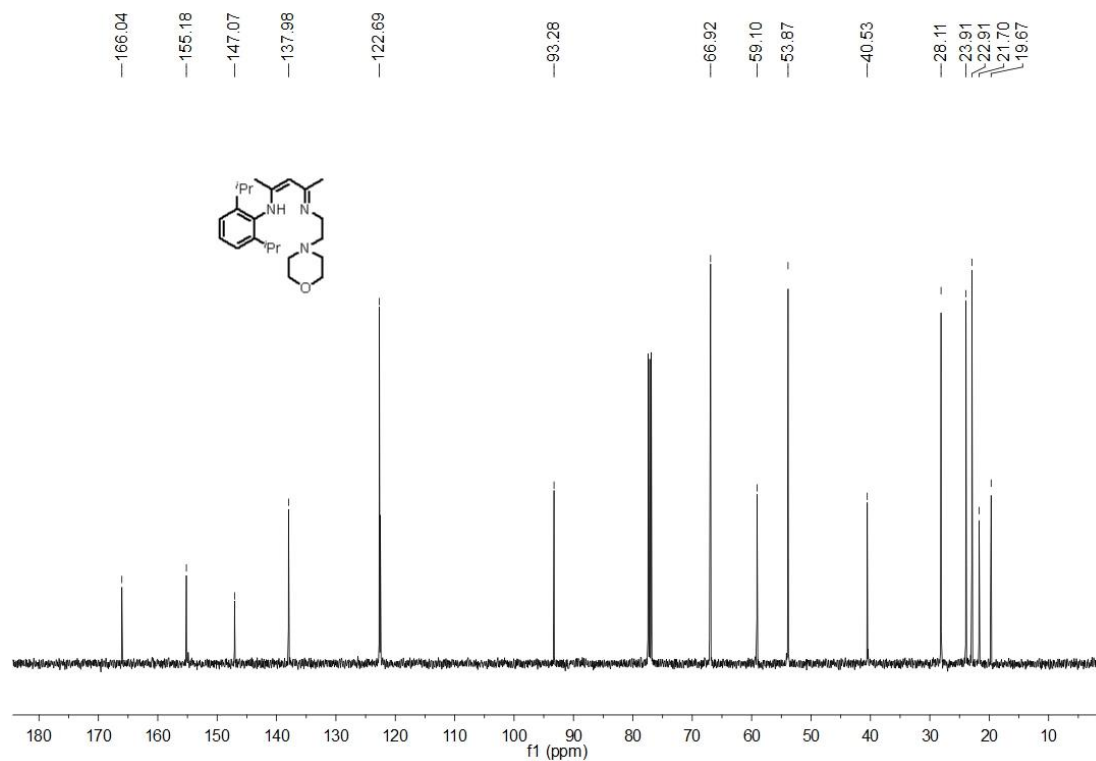

**Fig. S2.** <sup>13</sup>C NMR spectrum of **HL** (100 MHz, CDCl<sub>3</sub>, 20 °C)

### Copies of rare-earth metal complexes

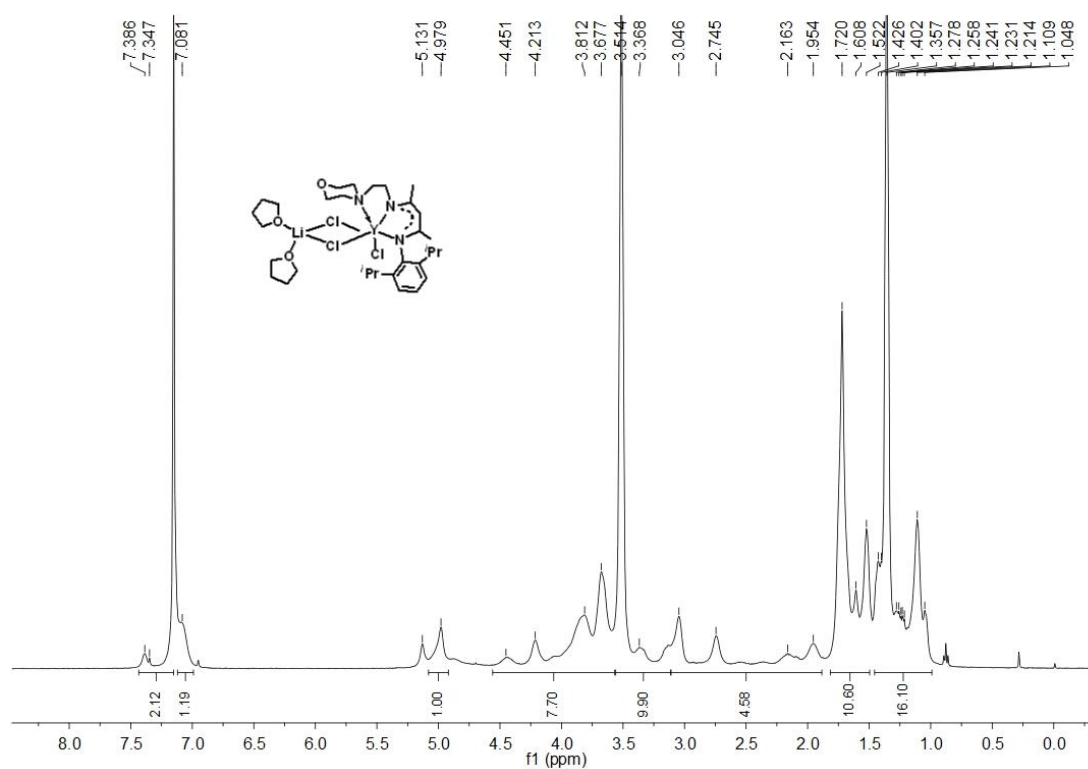

**Fig. S3.**  $^1\text{H}$  NMR spectrum of **1a** (400 MHz,  $\text{C}_6\text{D}_6$ , 20 °C)

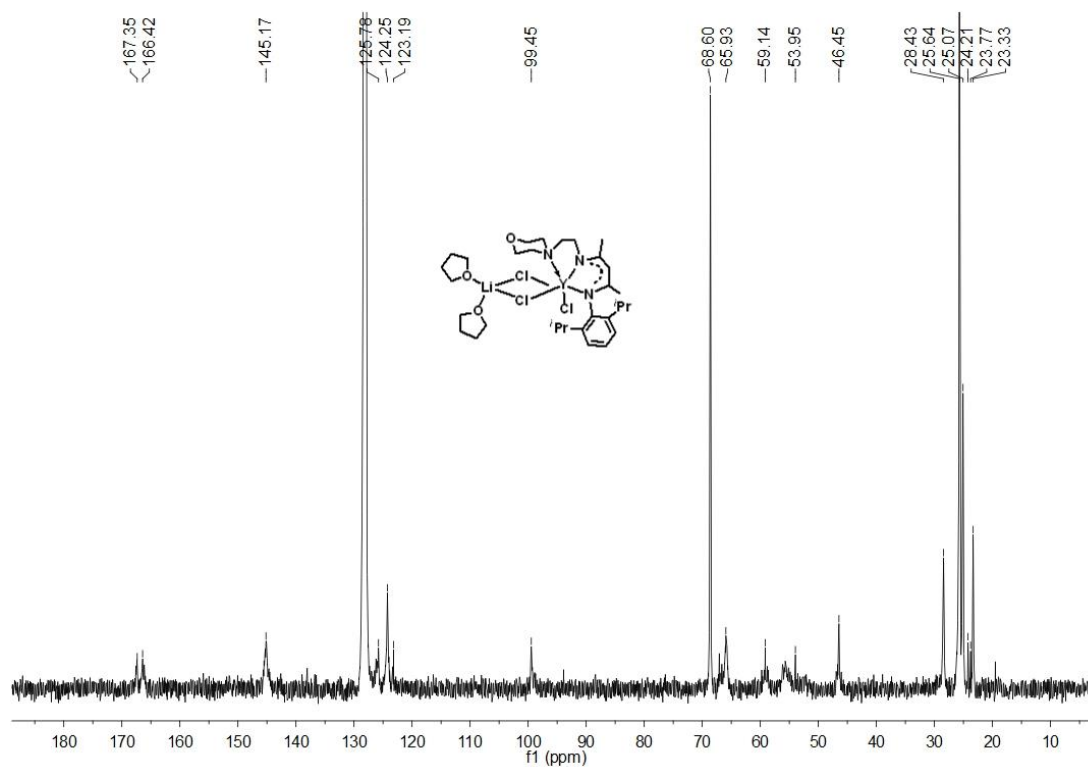

**Fig. S4.**  $^{13}\text{C}$  NMR spectrum of **1a** (100 MHz,  $\text{C}_6\text{D}_6$ , 20 °C)



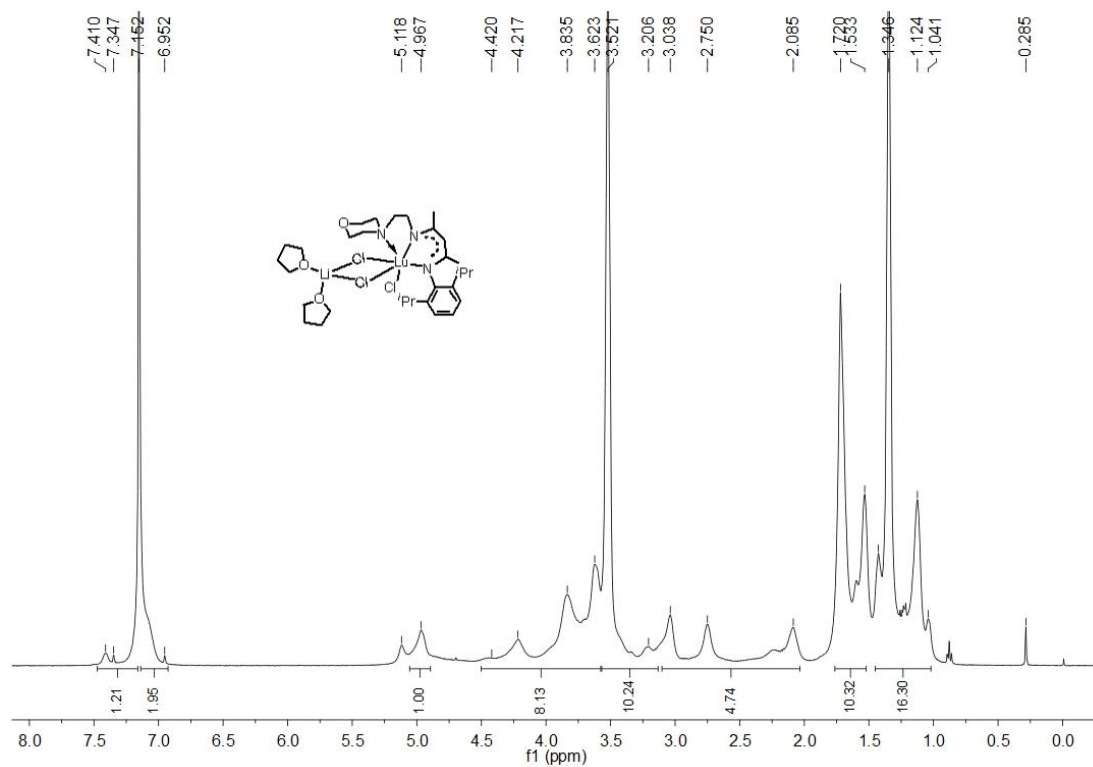

**Fig. S5.**  $^1\text{H}$  NMR spectrum of **1c** (400 MHz,  $\text{C}_6\text{D}_6$ , 20  $^\circ\text{C}$ )

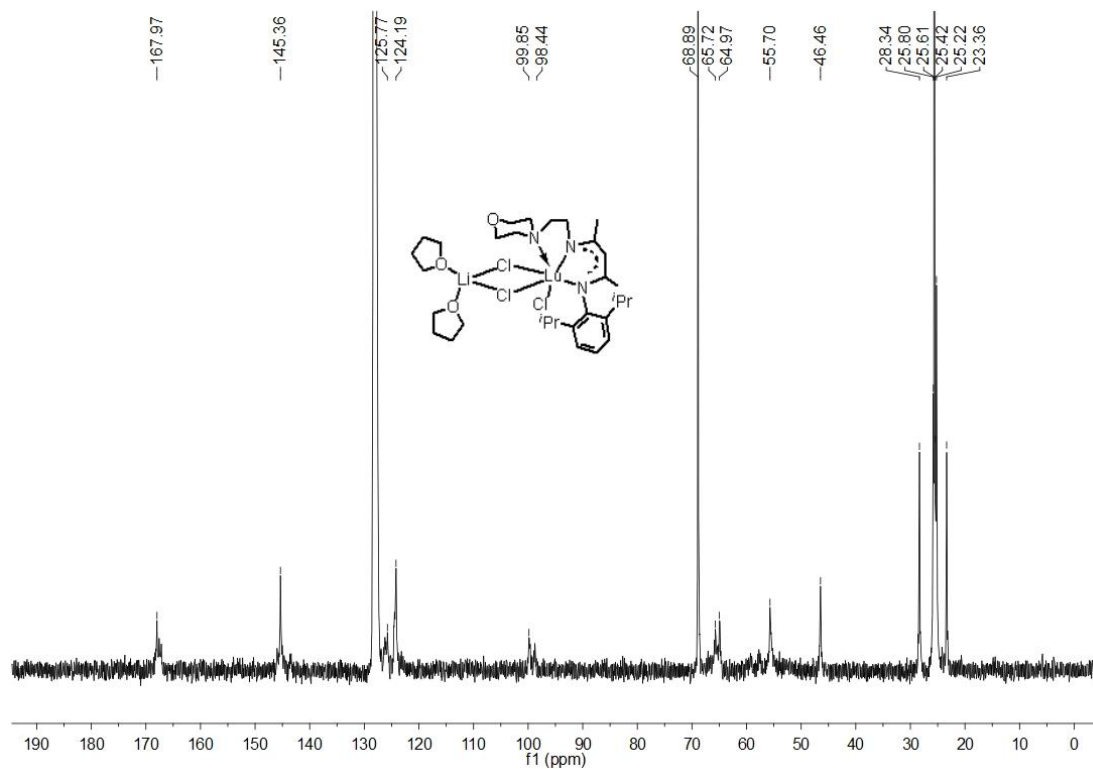

**Fig. S6.**  $^{13}\text{C}$  NMR spectrum of **1c** (100 MHz,  $\text{C}_6\text{D}_6$ , 20  $^\circ\text{C}$ )

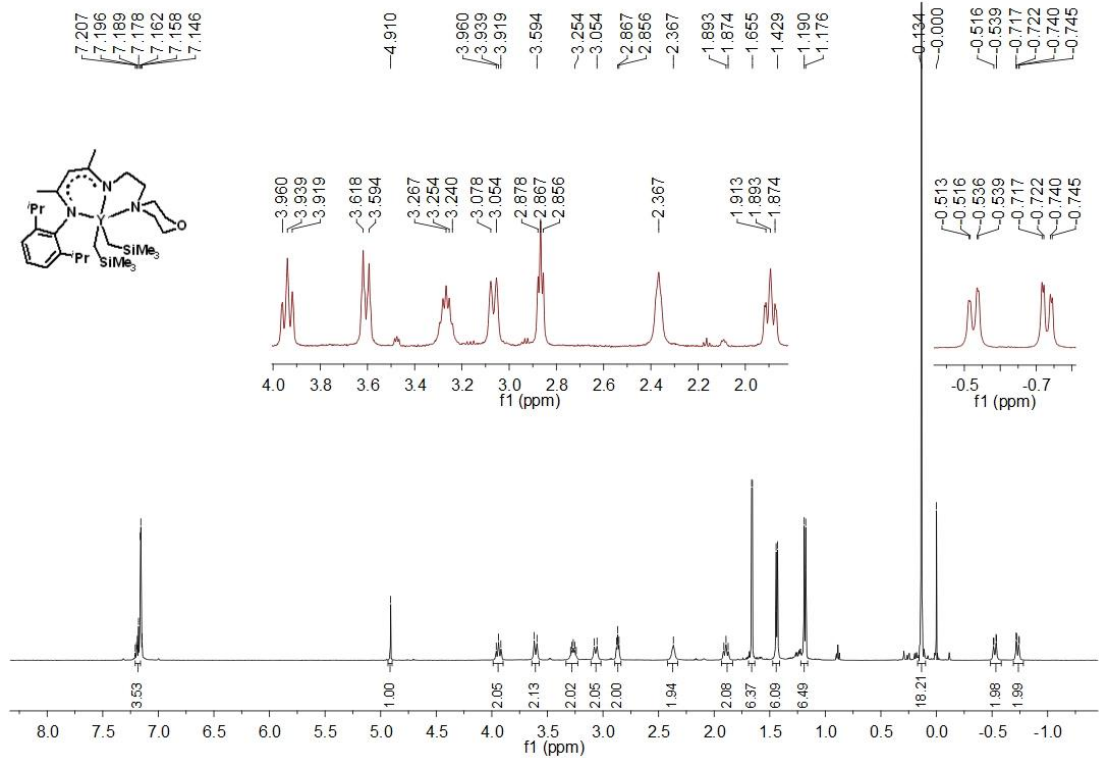

**Fig. S7.** <sup>1</sup>H NMR spectrum of **2a** (500 MHz, C<sub>6</sub>D<sub>6</sub>, 20 °C)

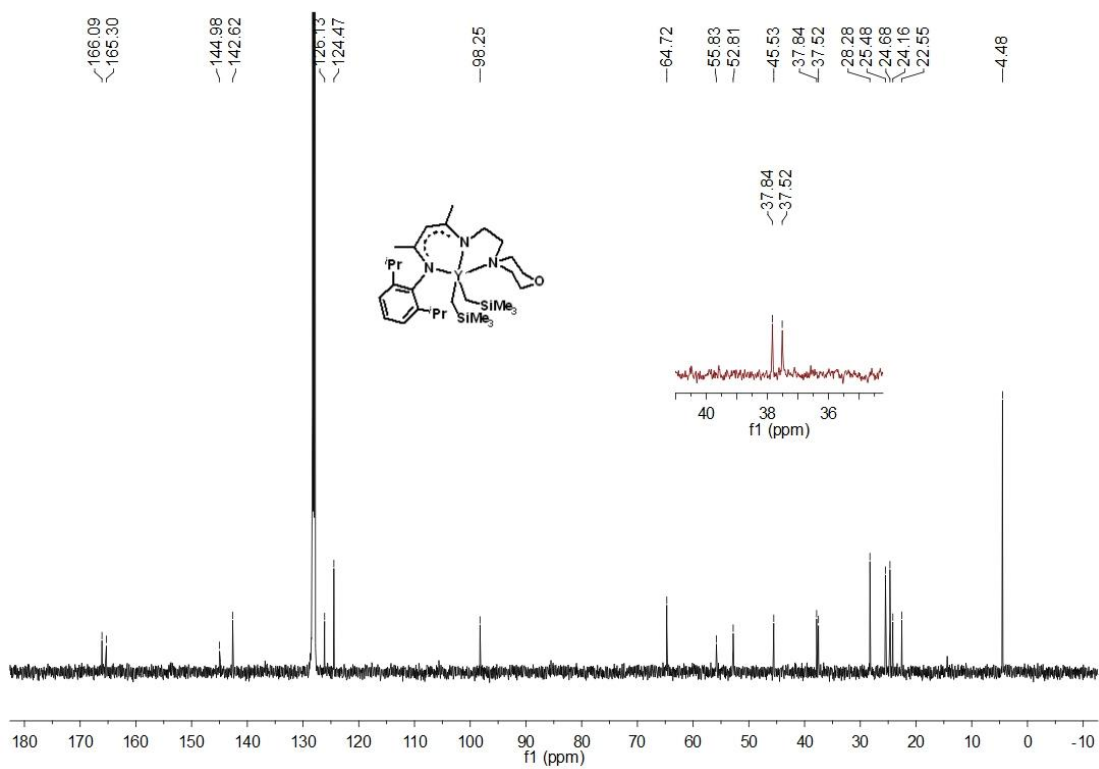

**Fig. S8.** <sup>13</sup>C NMR spectrum of **2a** (125 MHz, C<sub>6</sub>D<sub>6</sub>, 20 °C)

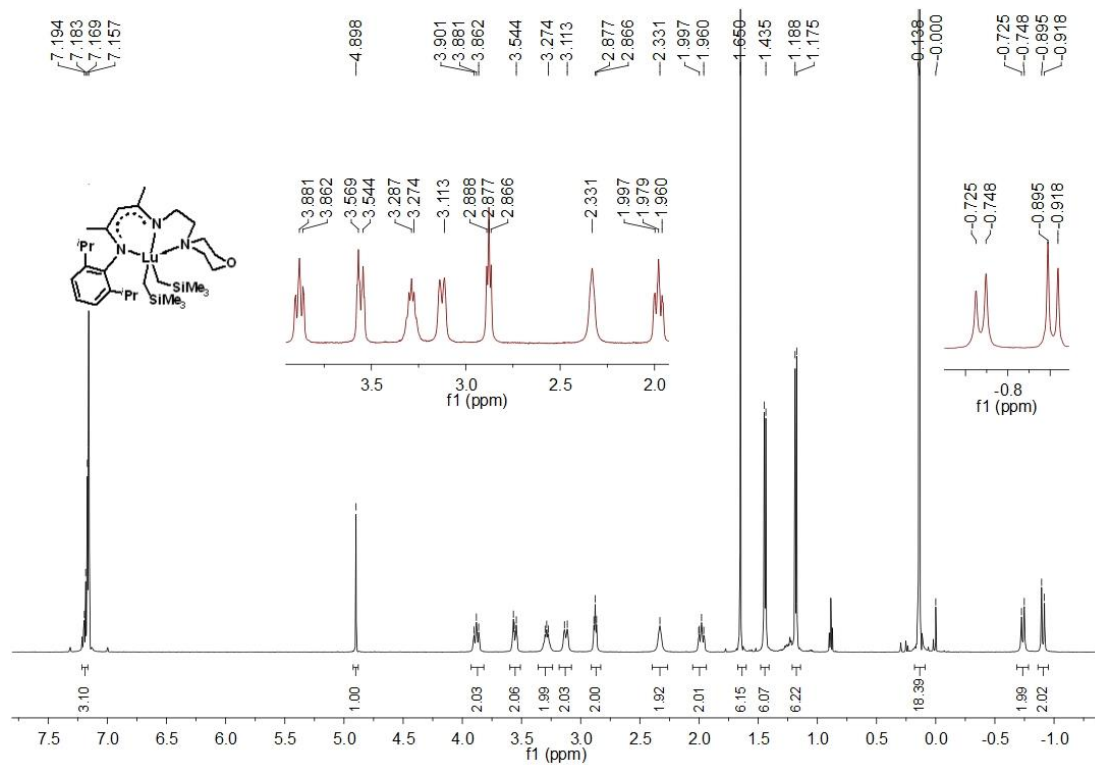

**Fig. S9.**  $^1\text{H}$  NMR spectrum of **2c** (500 MHz,  $\text{C}_6\text{D}_6$ , 20  $^\circ\text{C}$ )

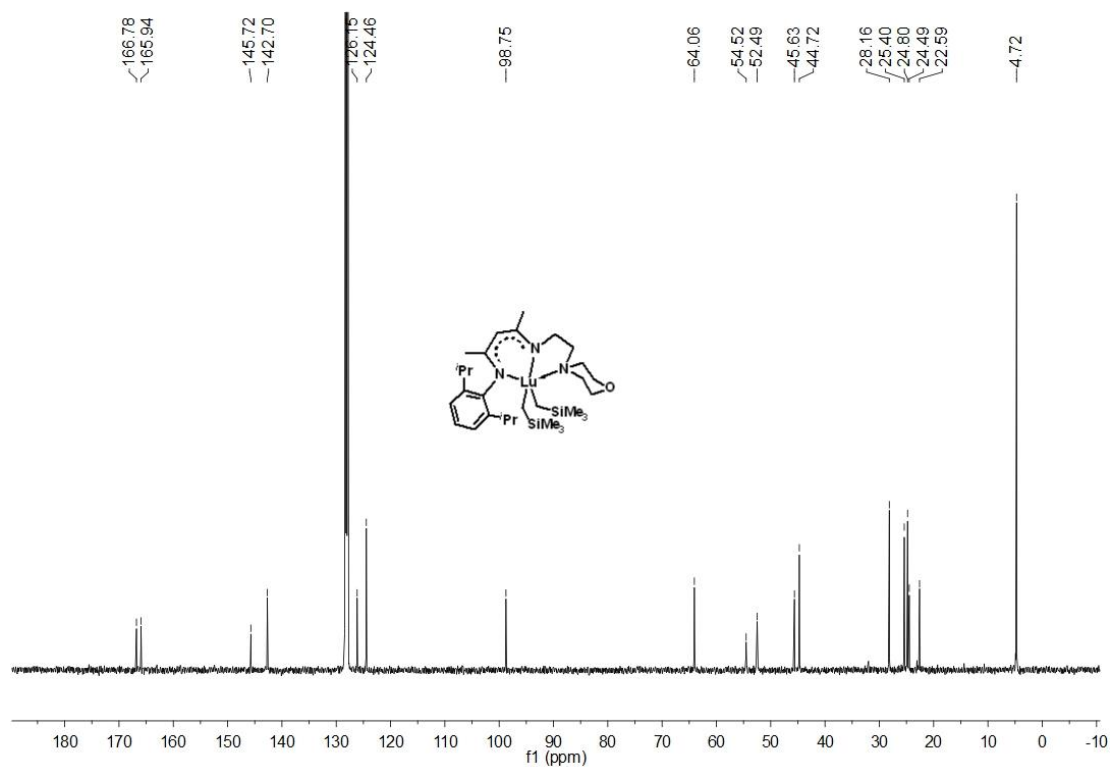

**Fig. S10.**  $^{13}\text{C}$  NMR spectrum of **2c** (125 MHz,  $\text{C}_6\text{D}_6$ , 20  $^\circ\text{C}$ )

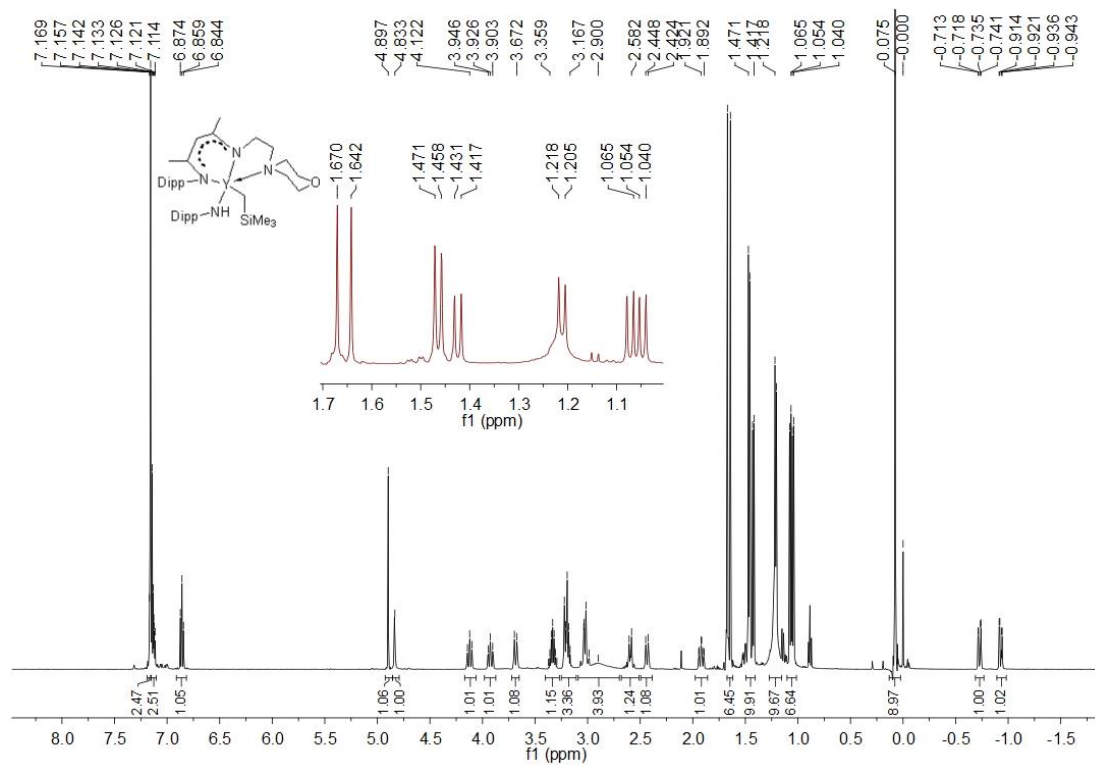

**Fig. S11.** <sup>1</sup>H NMR spectrum of **5a** (500 MHz, C<sub>6</sub>D<sub>6</sub>, 20 °C)

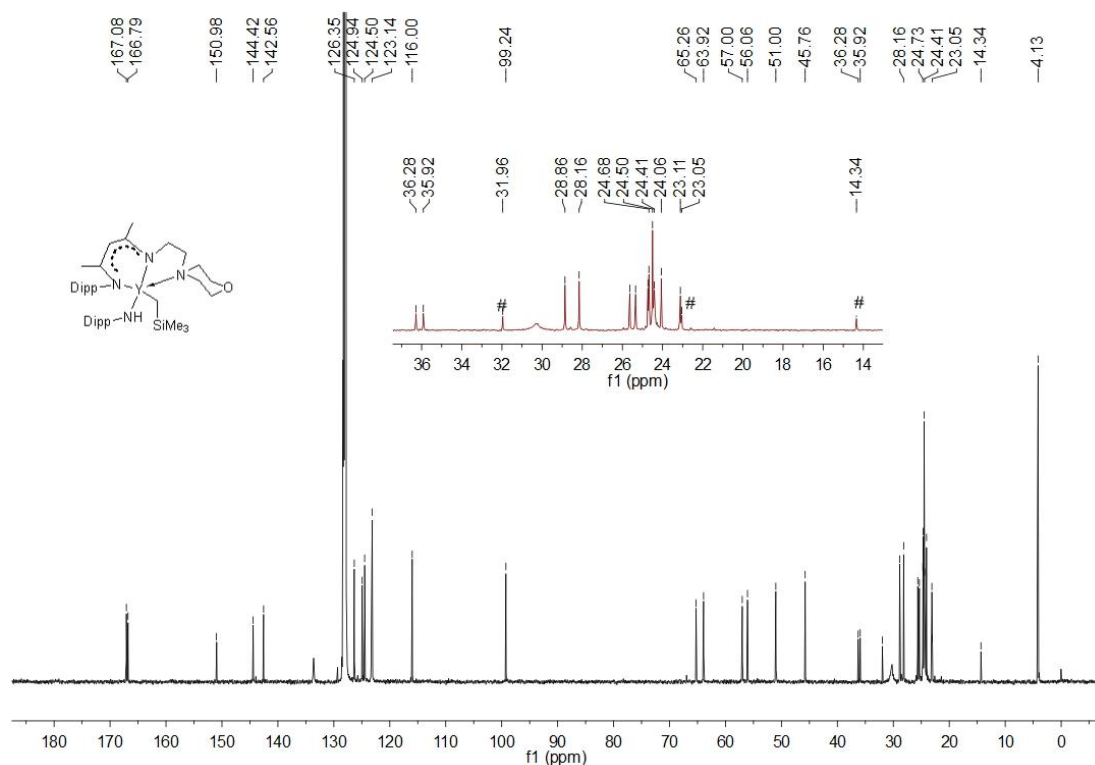

**Fig. S12.** <sup>13</sup>C NMR spectrum of **5a** (125 MHz, C<sub>6</sub>D<sub>6</sub>, 20 °C). The peaks labelled with # represent residual *n*-hexane.

### Copies of thiocarbamates

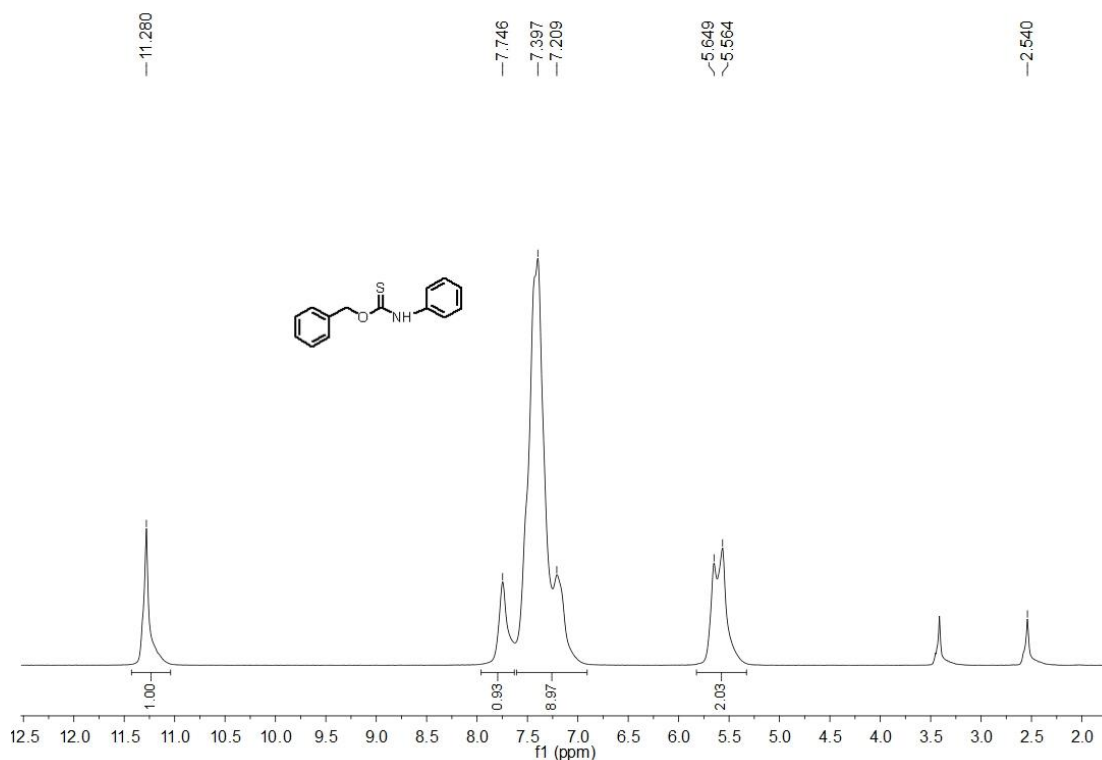

**Fig. S13.**  $^1\text{H}$  NMR spectrum of 3aa (400 MHz, DMSO- $d_6$ , 20 °C)

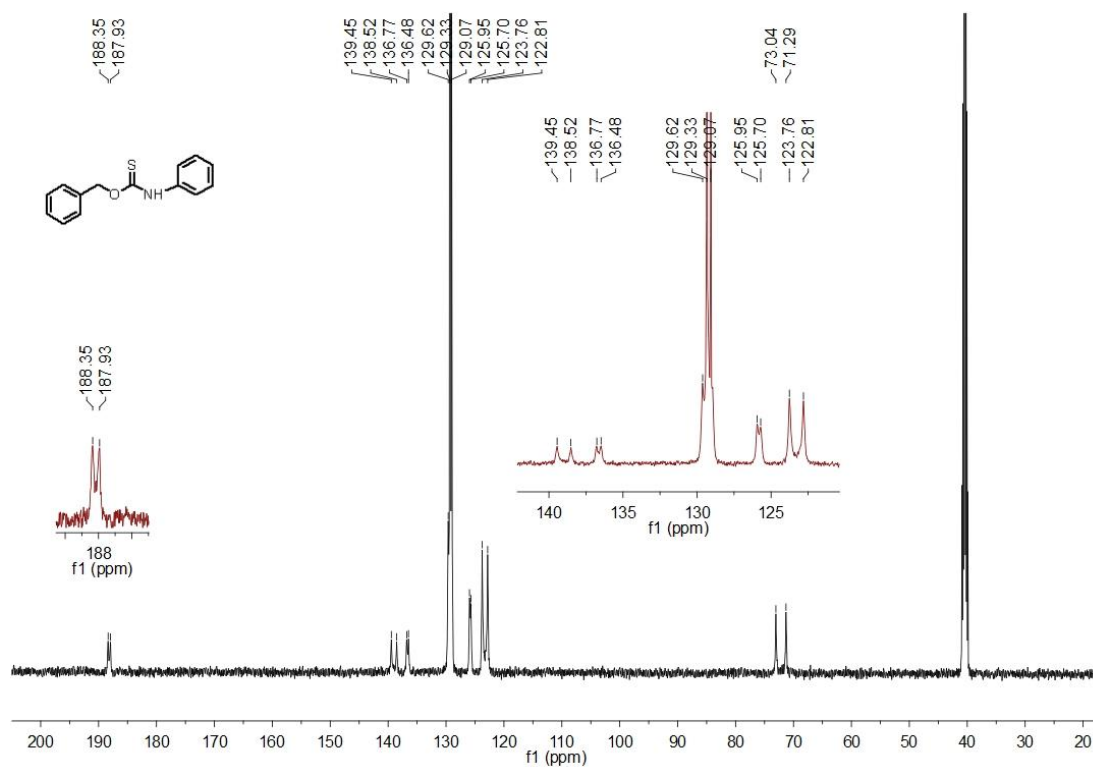

**Fig. S14.**  $^{13}\text{C}$  NMR spectrum of 3aa (100 MHz, DMSO- $d_6$ , 20 °C)

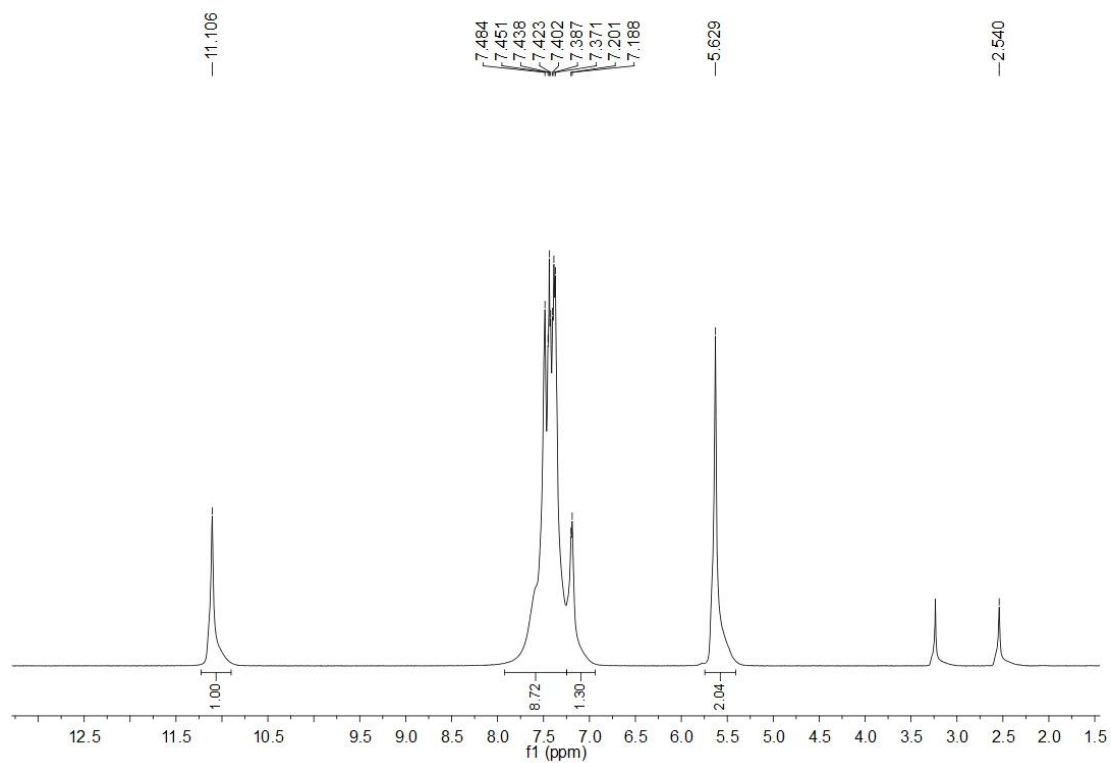

**Fig. S15.** <sup>1</sup>H NMR spectrum of 3aa (500 MHz, DMSO-*d*<sub>6</sub>, 60 °C)

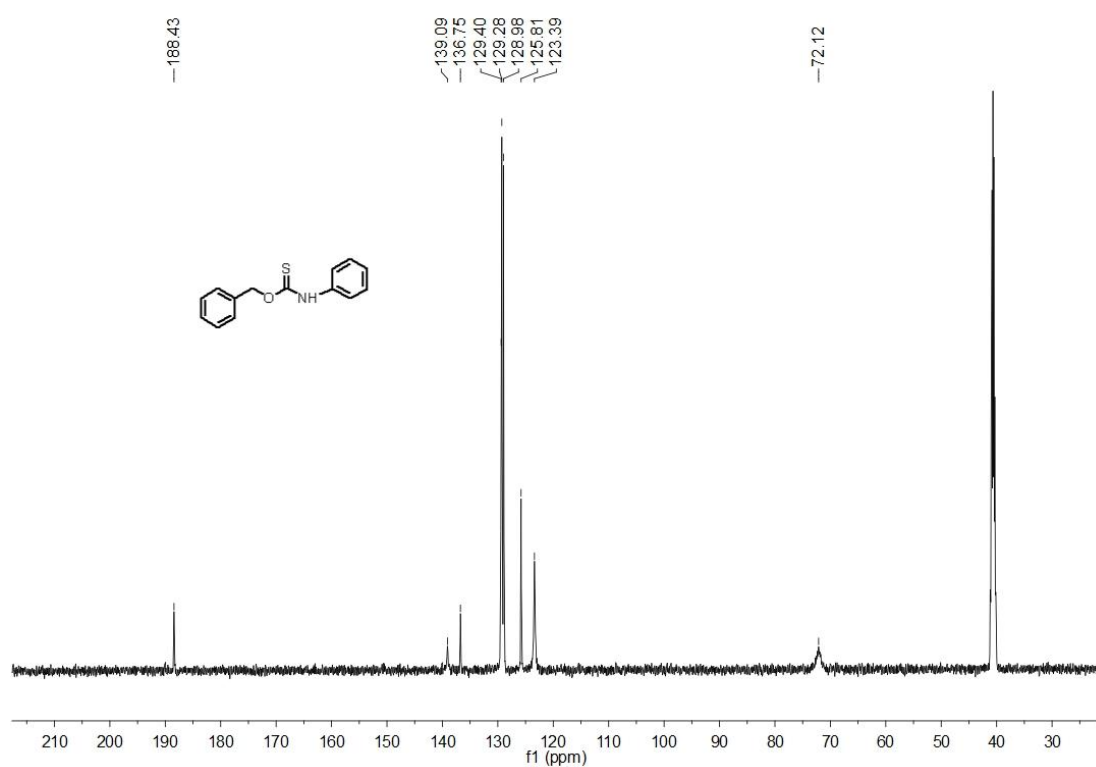

**Fig. S16.** <sup>13</sup>C NMR spectrum of 3aa (125 MHz, DMSO-*d*<sub>6</sub>, 60 °C)

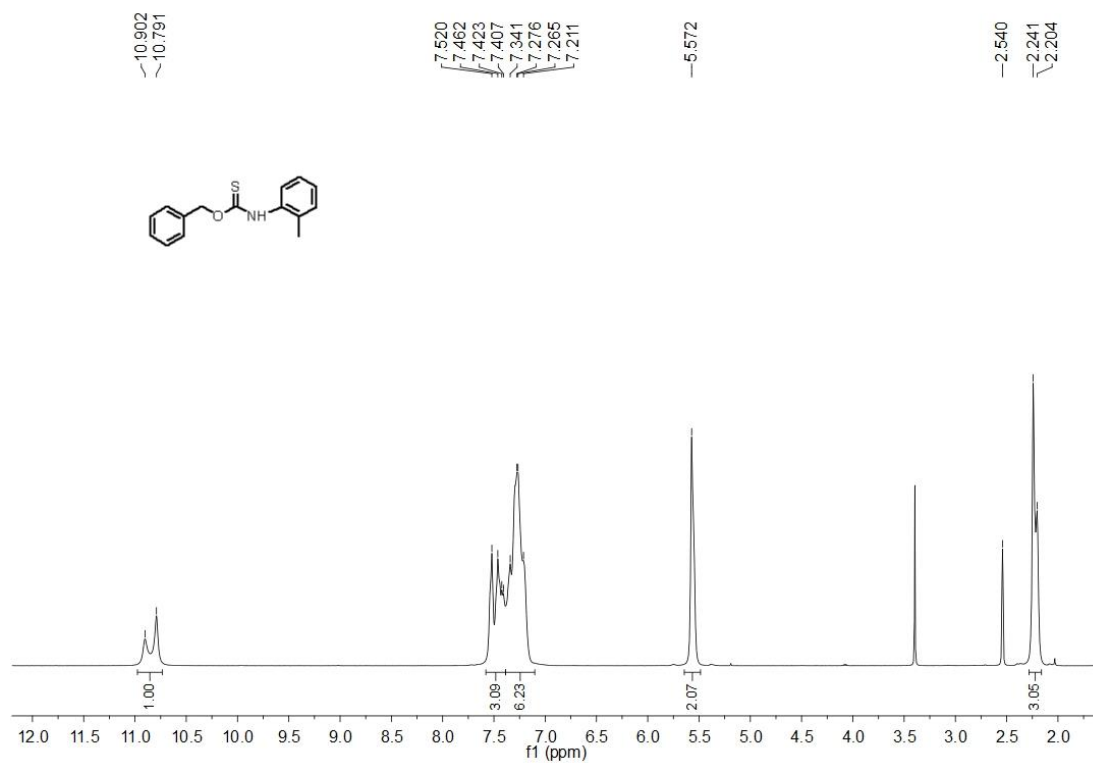

**Fig. S17.** <sup>1</sup>H NMR spectrum of 3ab (400 MHz, DMSO-*d*<sub>6</sub>, 20 °C)

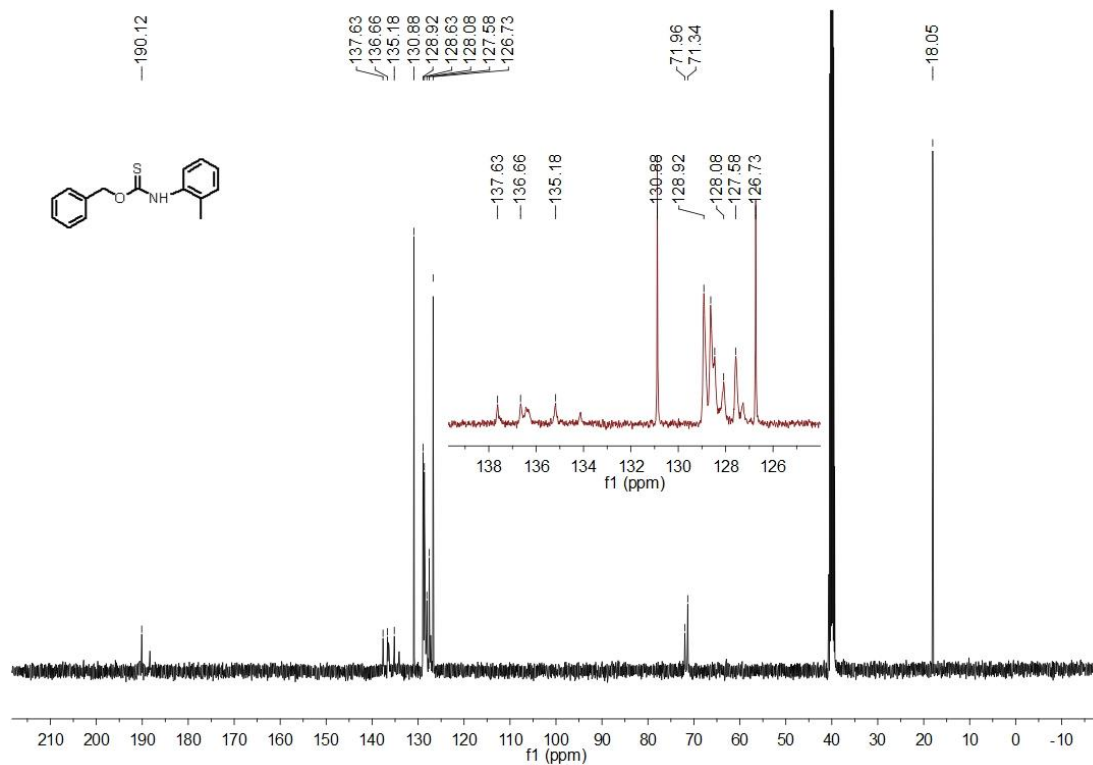

**Fig. S18.** <sup>13</sup>C NMR spectrum of 3ab (100 MHz, DMSO-*d*<sub>6</sub>, 20 °C)

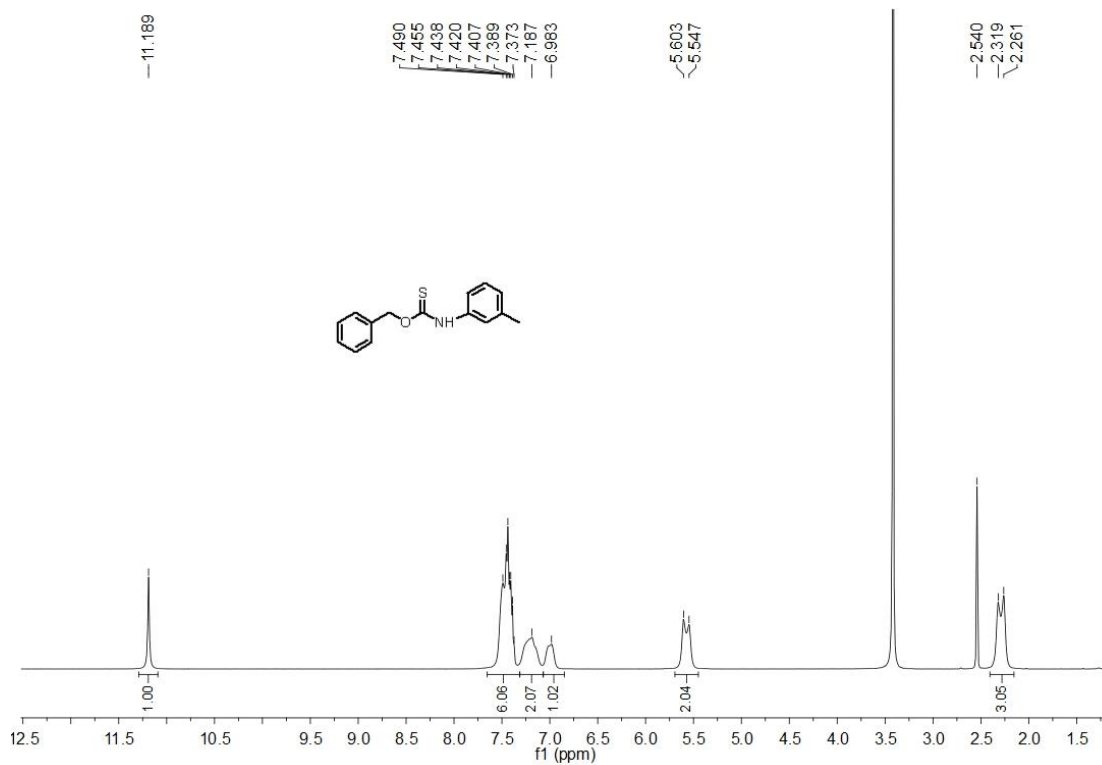

**Fig. S19.**  $^1\text{H NMR}$  spectrum of 3ac (400 MHz,  $\text{DMSO-}d_6$ , 20 °C)

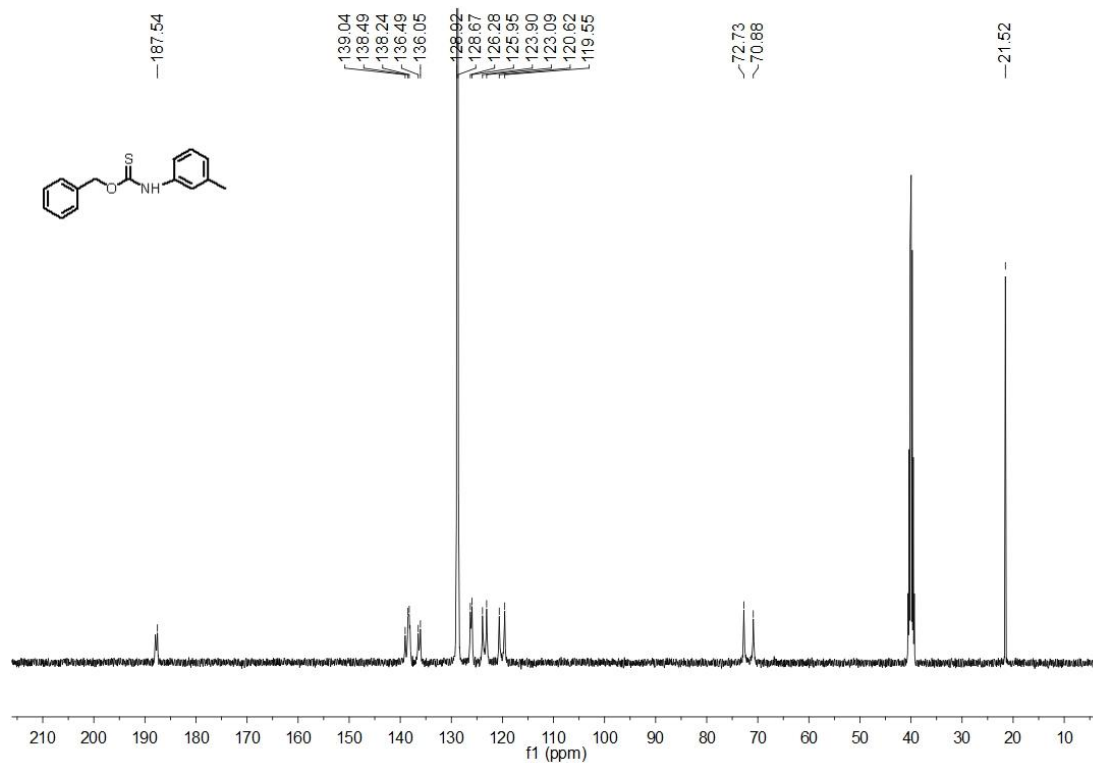

**Fig. S20.**  $^{13}\text{C NMR}$  spectrum of 3ac (100 MHz,  $\text{DMSO-}d_6$ , 20 °C)



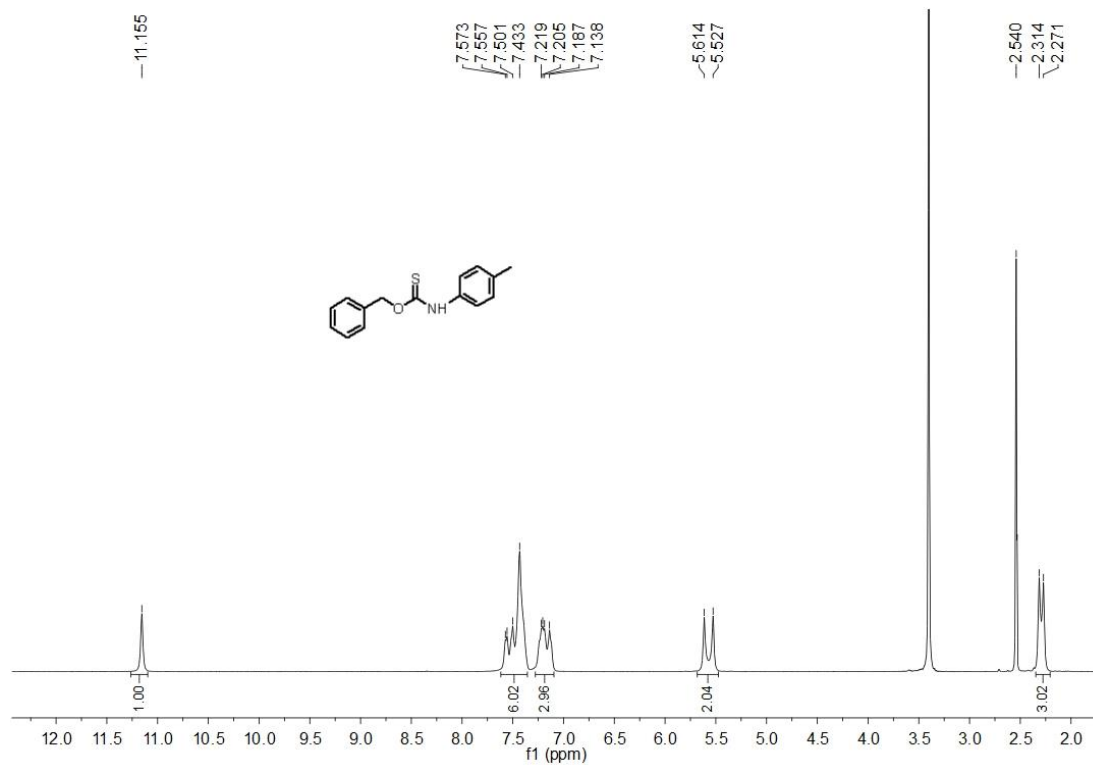

**Fig. S21.**  $^1\text{H}$  NMR spectrum of **3ad** (400 MHz,  $\text{DMSO-}d_6$ , 20 °C)

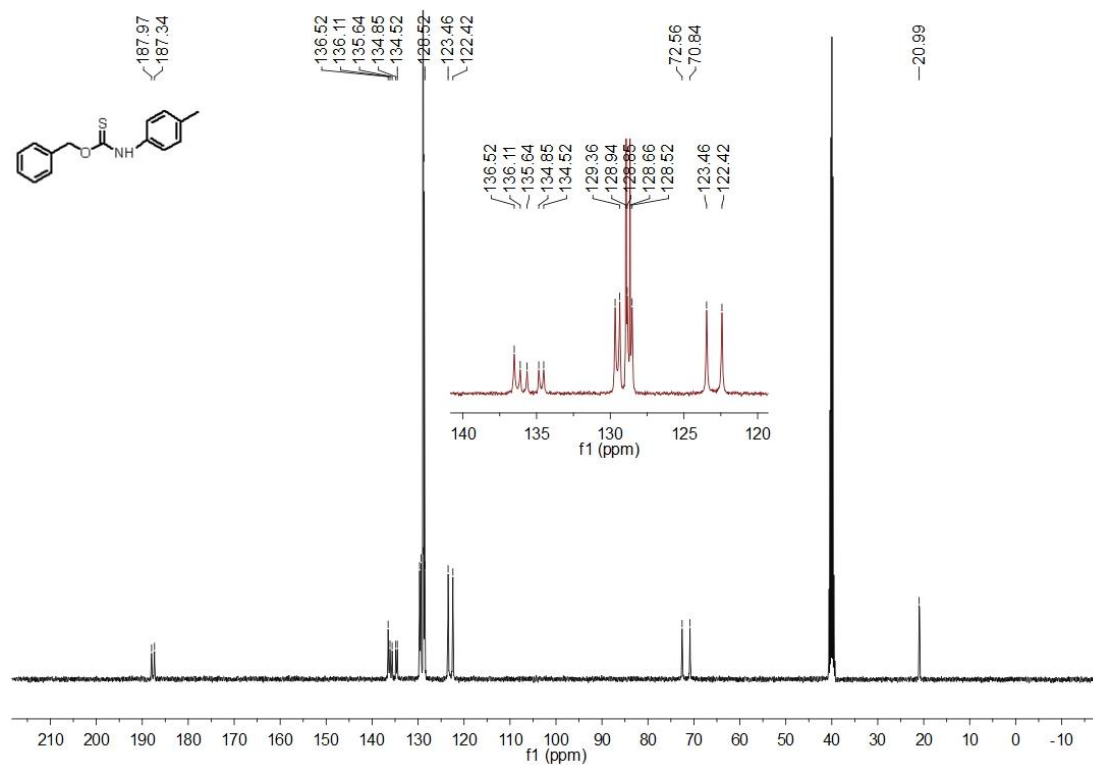

**Fig. S22.**  $^{13}\text{C}$  NMR spectrum of **3ad** (100 MHz,  $\text{DMSO-}d_6$ , 20 °C)

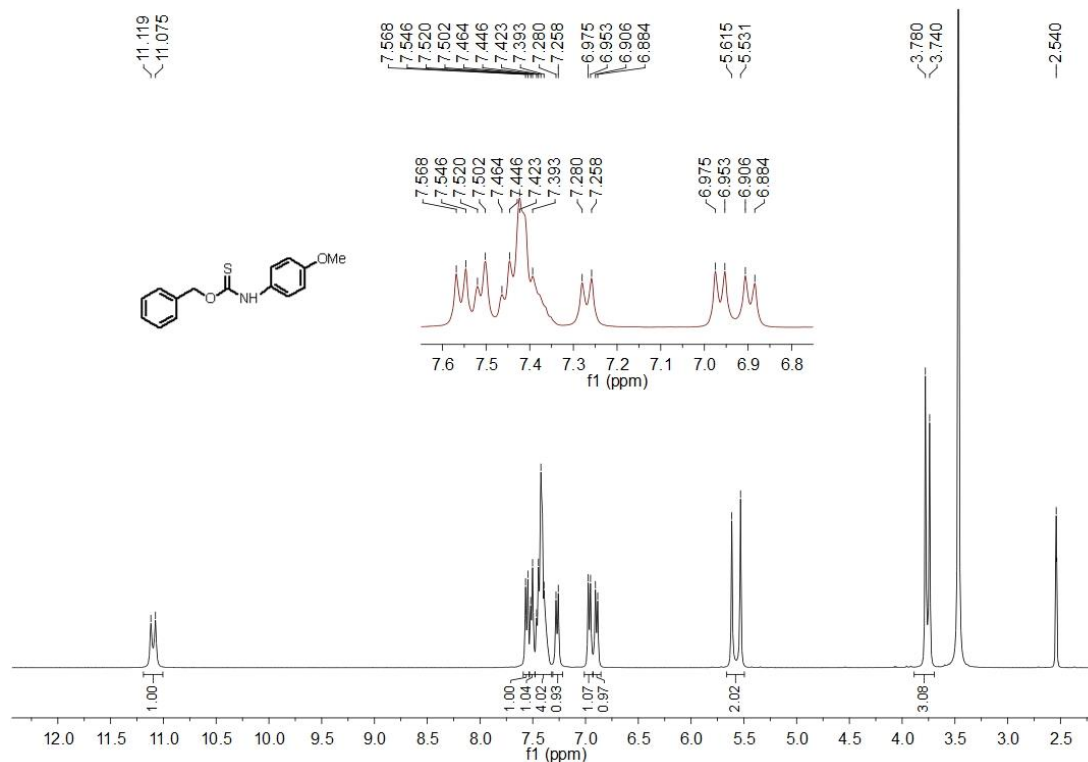

**Fig. S23.** <sup>1</sup>H NMR spectrum of **3ae** (400 MHz, DMSO-*d*<sub>6</sub>, 20 °C)

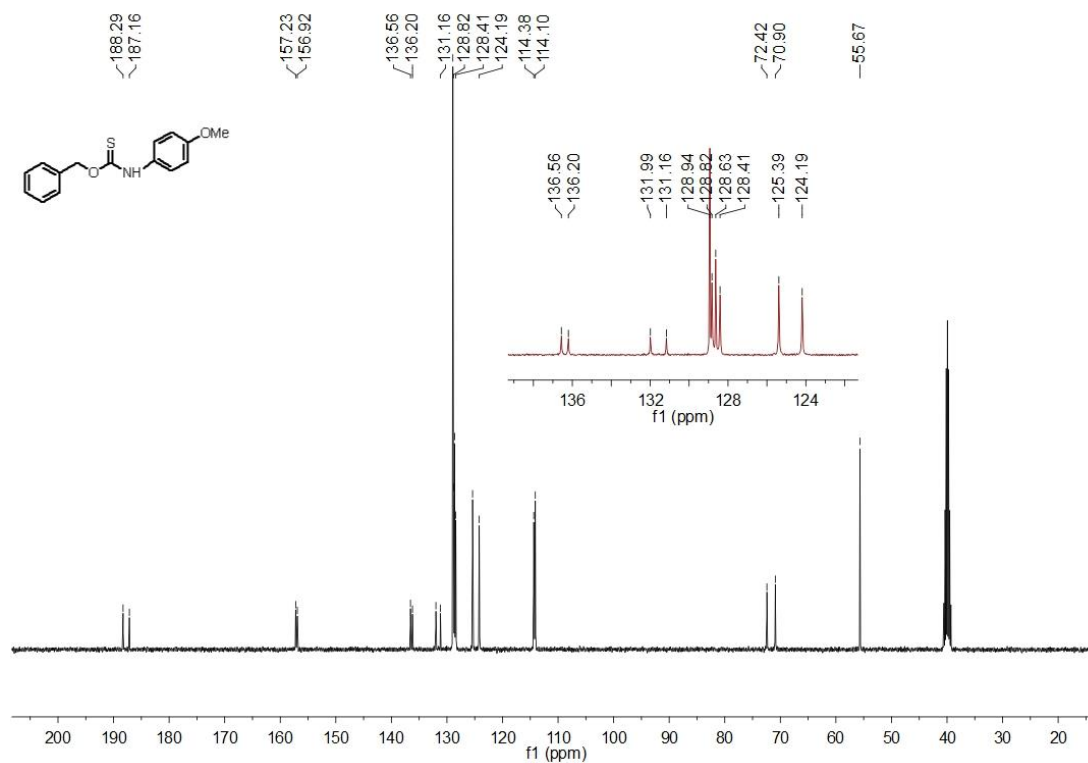

**Fig. S24.** <sup>13</sup>C NMR spectrum of **3ae** (100 MHz, DMSO-*d*<sub>6</sub>, 20 °C)

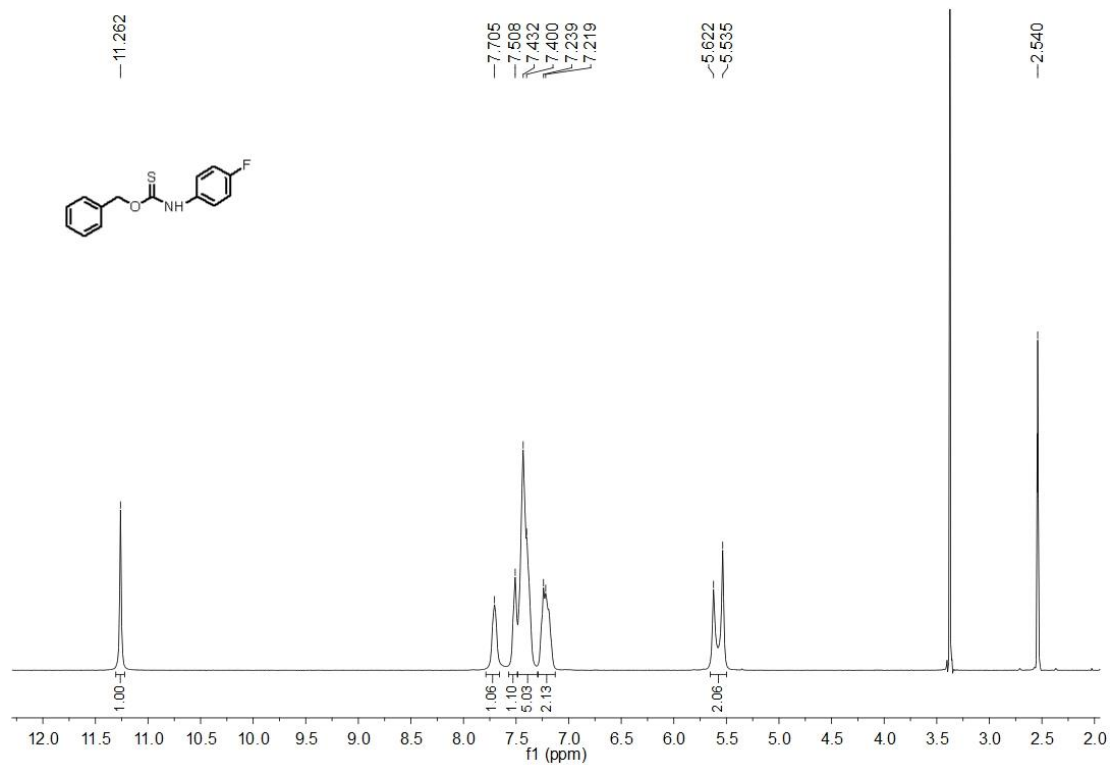

**Fig. S25.** <sup>1</sup>H NMR spectrum of 3af (400 MHz, DMSO-*d*<sub>6</sub>, 20 °C)

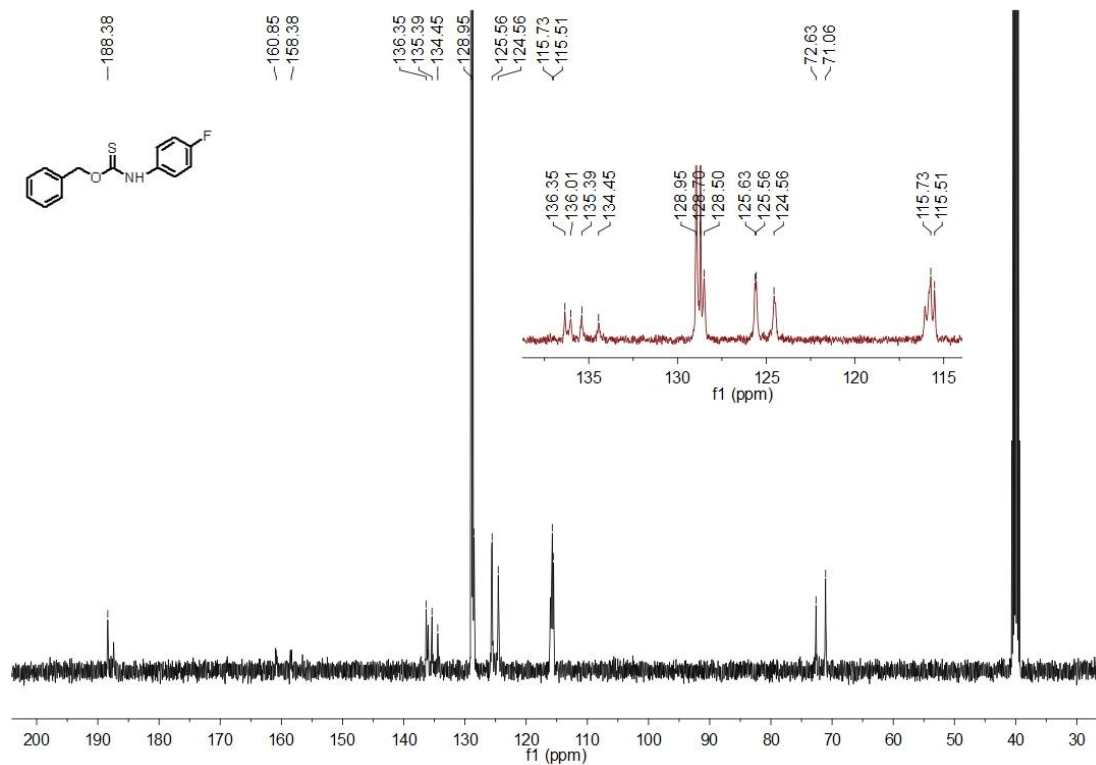

**Fig. S26.** <sup>13</sup>C NMR spectrum of 3af (100 MHz, DMSO-*d*<sub>6</sub>, 20 °C)

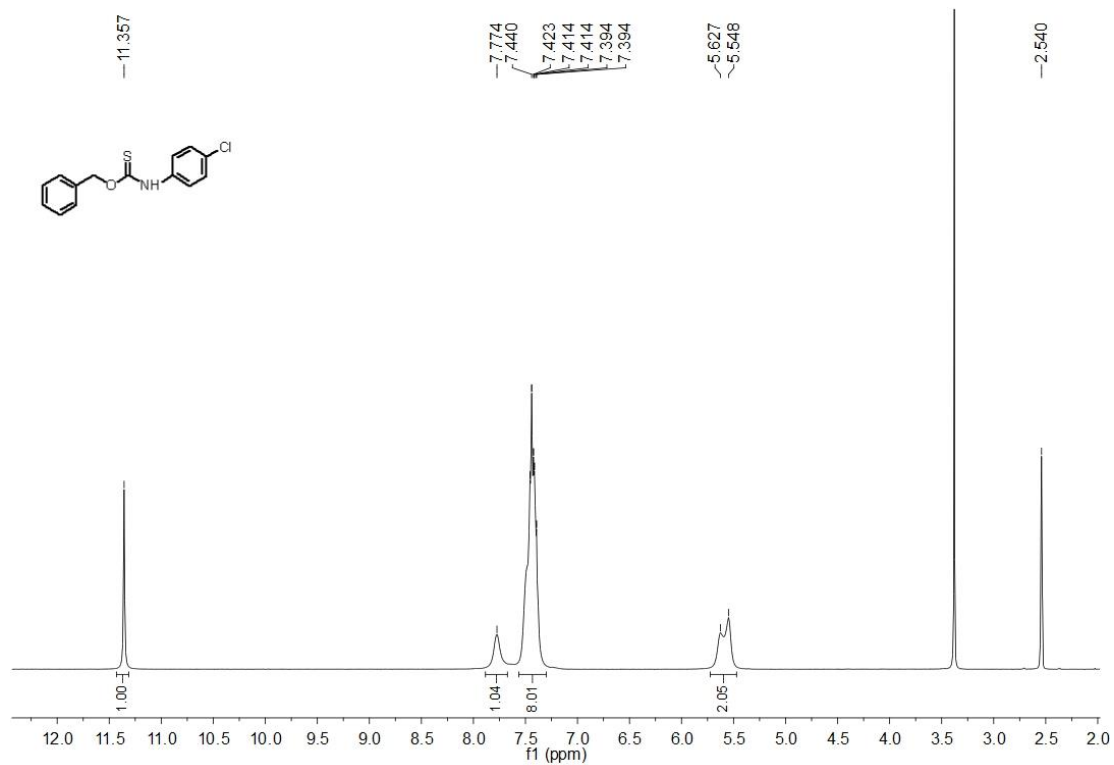

**Fig. S27.** <sup>1</sup>H NMR spectrum of 3ag (400 MHz, DMSO-*d*<sub>6</sub>, 20 °C)

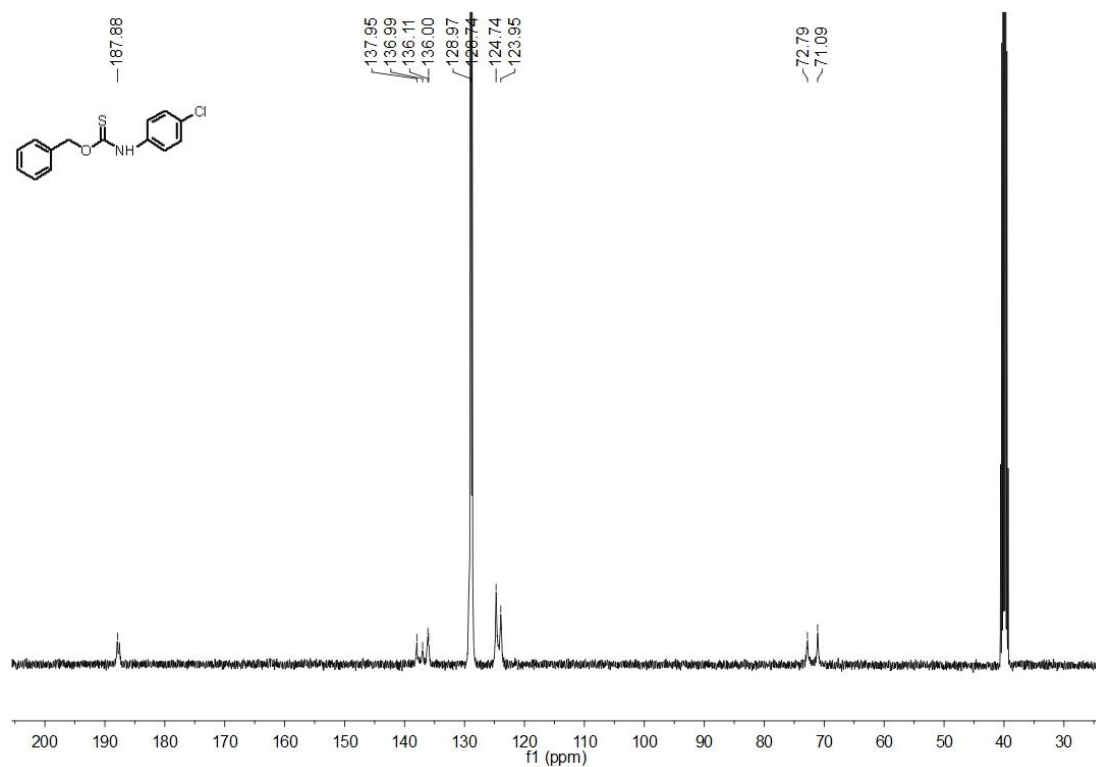

**Fig. S28.** <sup>13</sup>C NMR spectrum of 3ag (100 MHz, DMSO-*d*<sub>6</sub>, 20 °C)

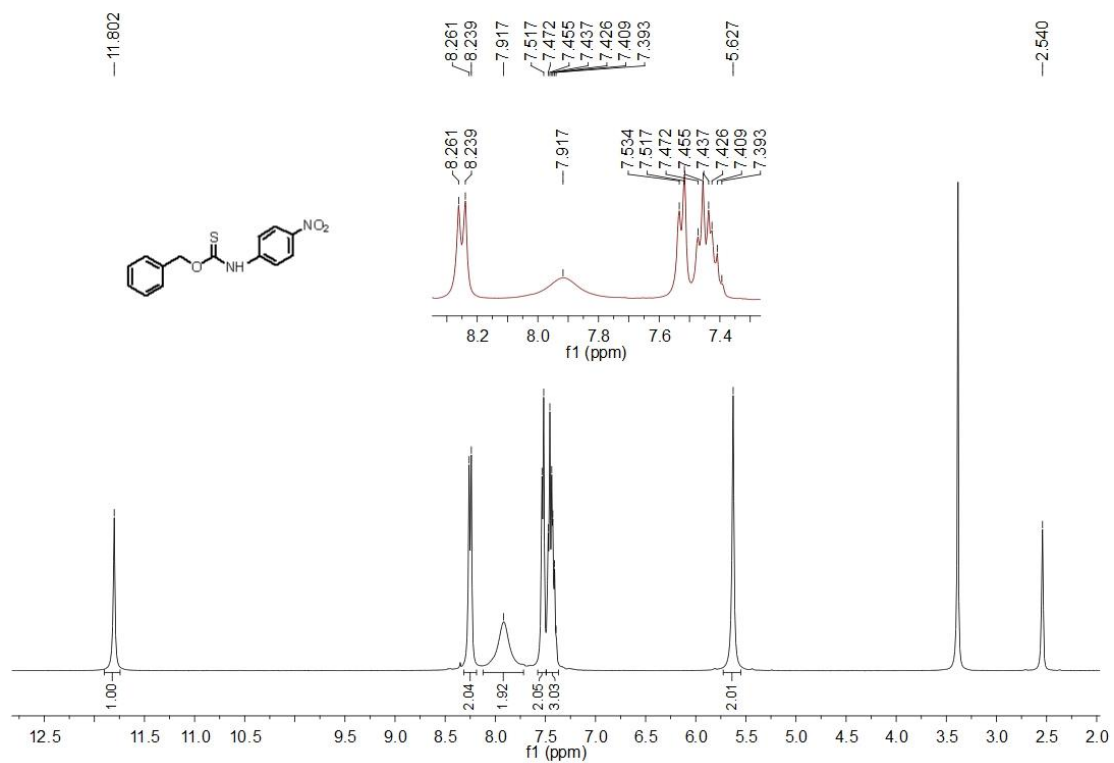

**Fig. S29.** <sup>1</sup>H NMR spectrum of **3ah** (400 MHz, DMSO-*d*<sub>6</sub>, 20 °C)

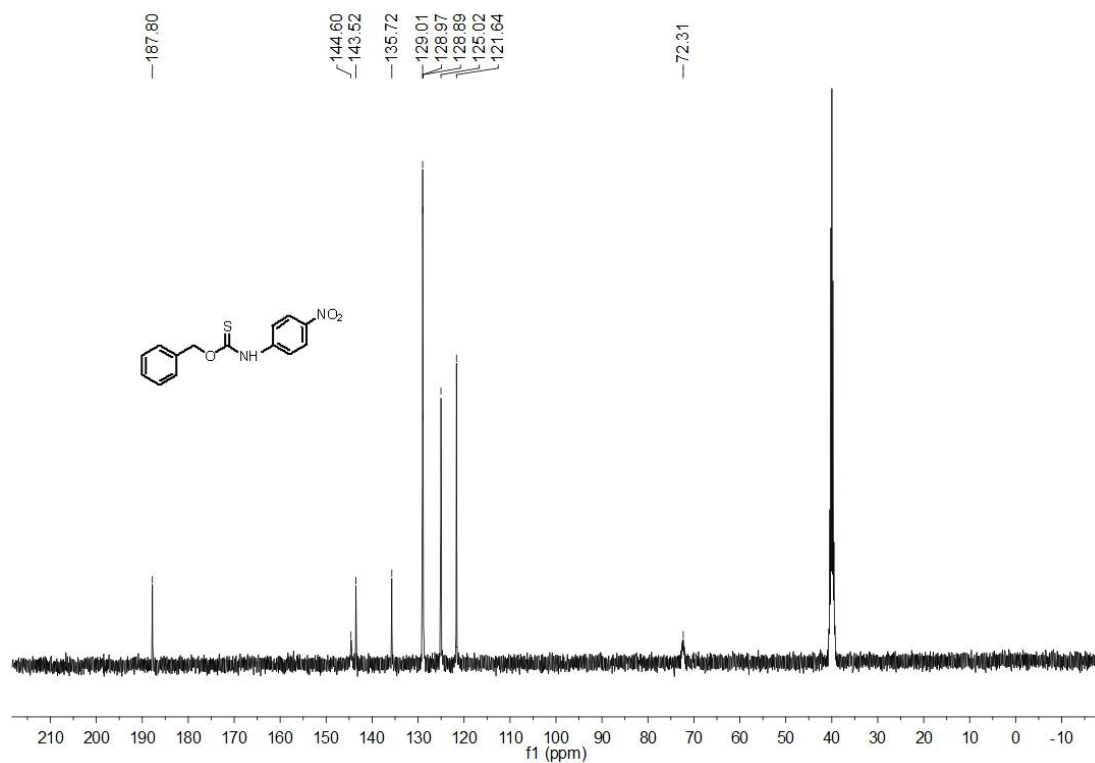

**Fig. S30.** <sup>13</sup>C NMR spectrum of **3ah** (100 MHz, DMSO-*d*<sub>6</sub>, 20 °C)

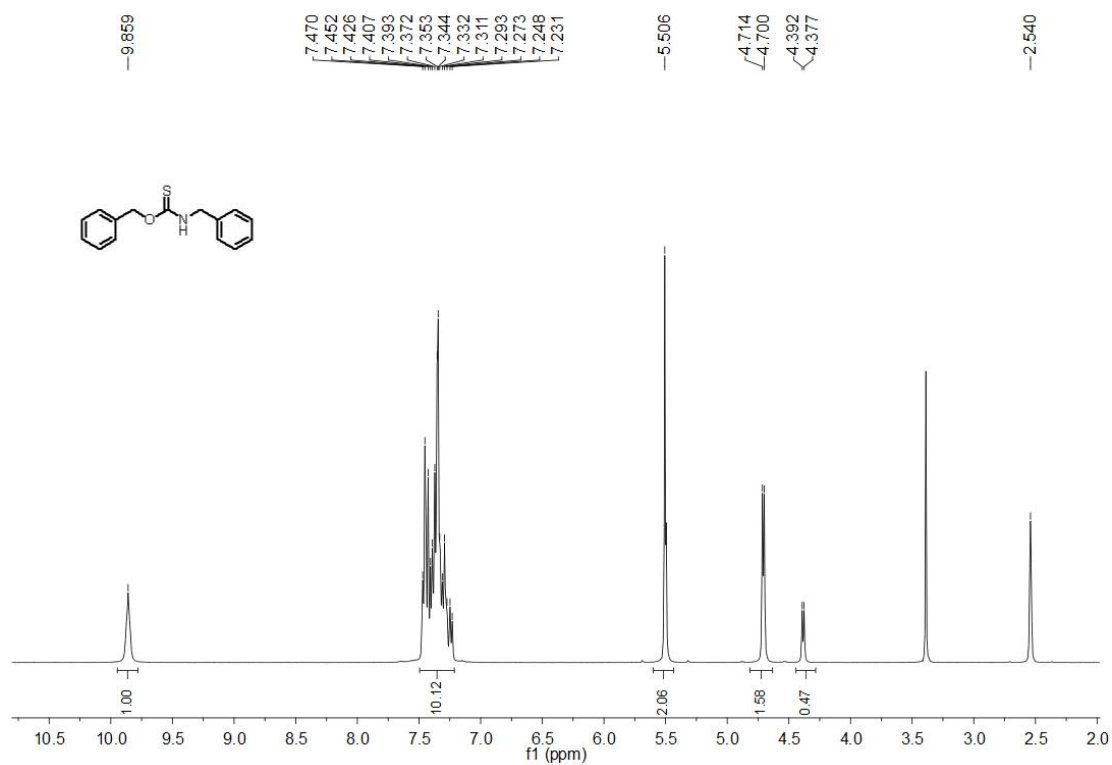

**Fig. S31.** <sup>1</sup>H NMR spectrum of 3ai (400 MHz, DMSO-*d*<sub>6</sub>, 20 °C)

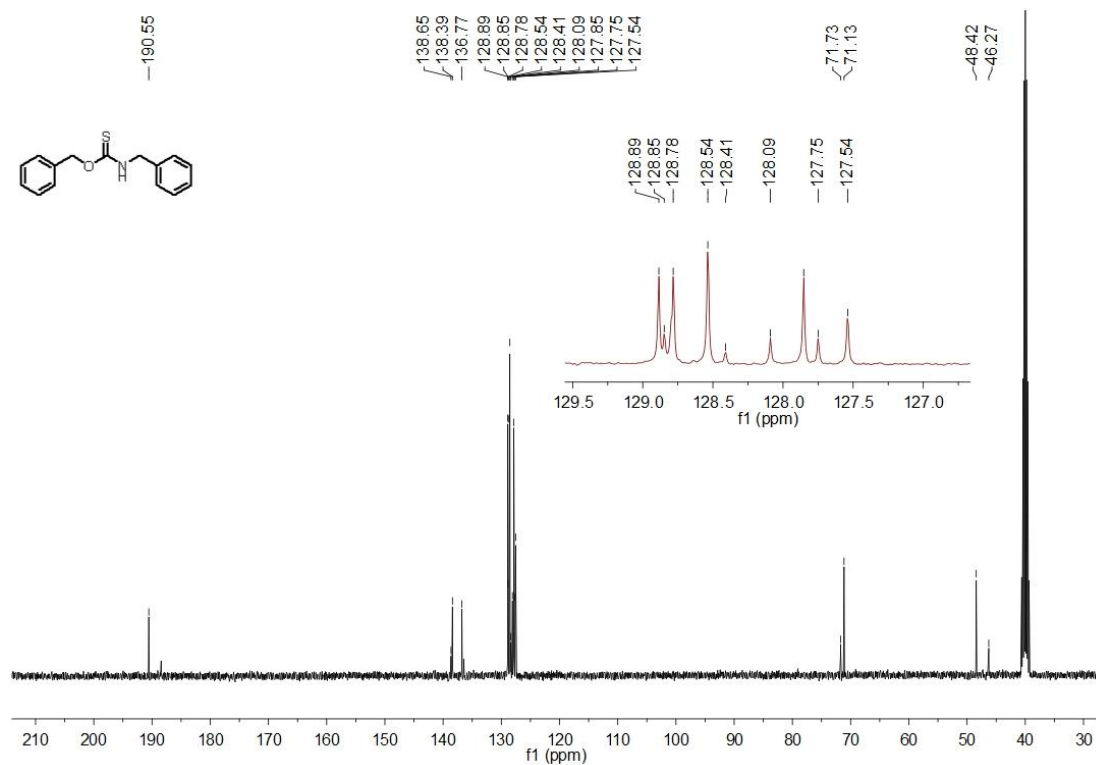

**Fig. S32.** <sup>13</sup>C NMR spectrum of 3ai (100 MHz, DMSO-*d*<sub>6</sub>, 20 °C)

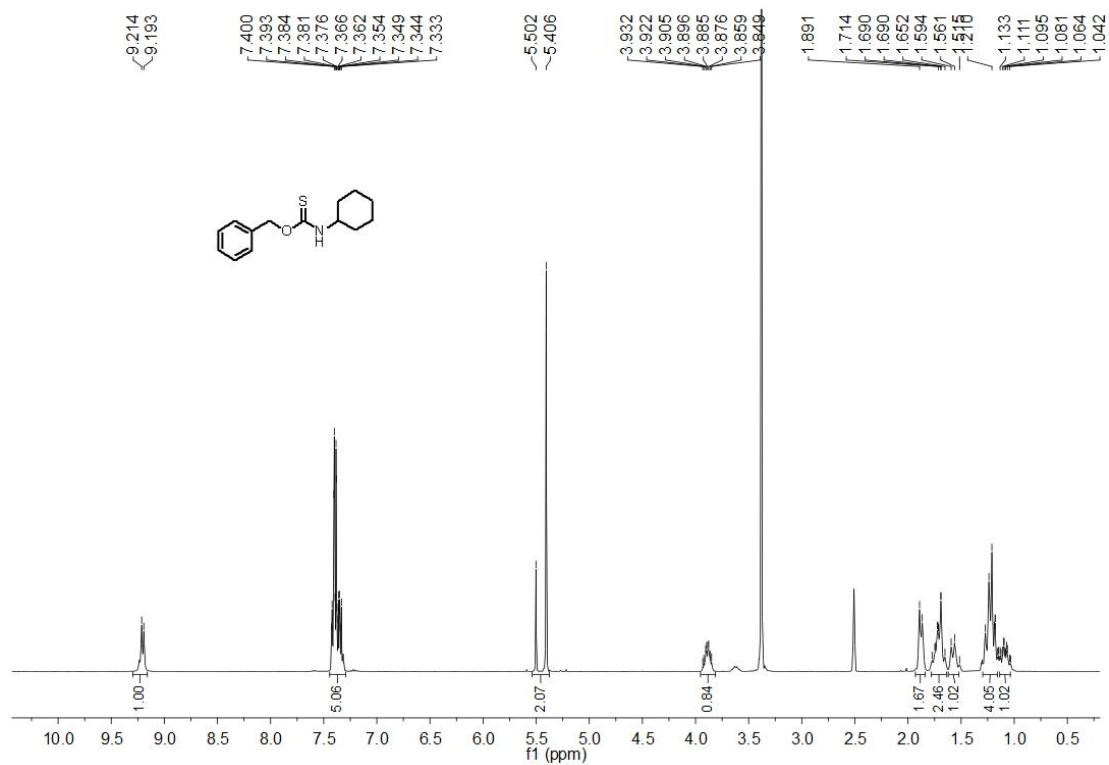

**Fig. S33.** <sup>1</sup>H NMR spectrum of **3aj** (400 MHz, DMSO-*d*<sub>6</sub>, 20 °C)

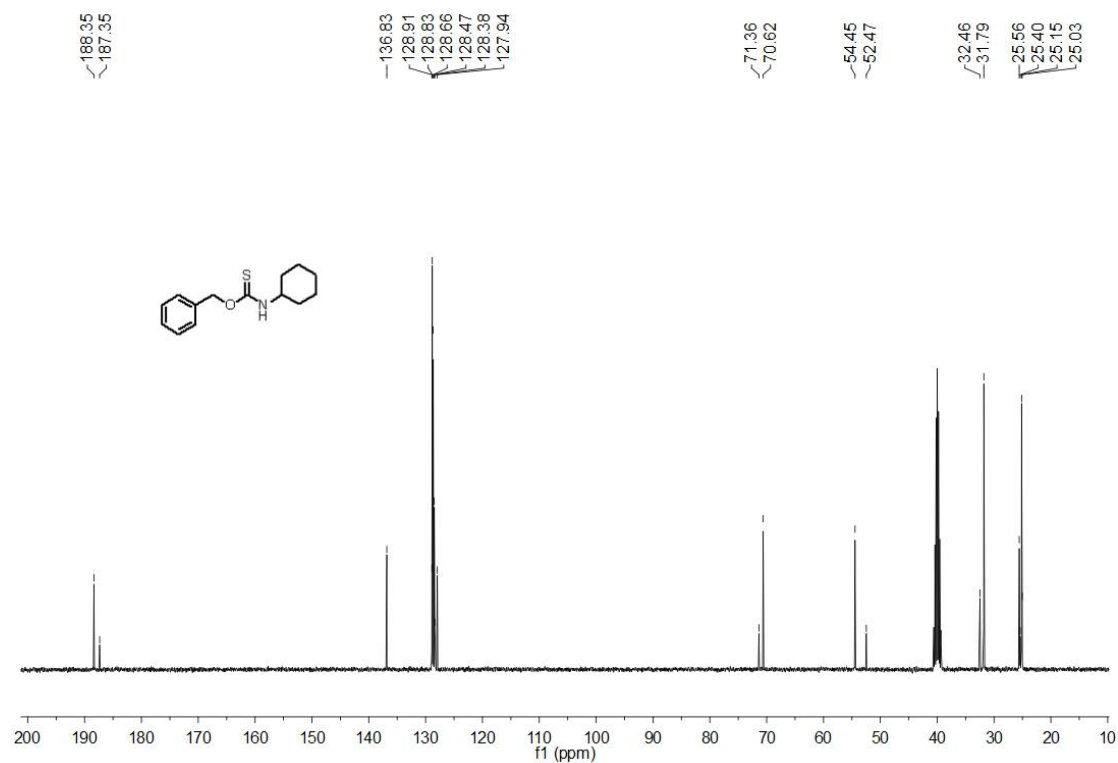

**Fig. S34.** <sup>13</sup>C NMR spectrum of **3aj** (100 MHz, DMSO-*d*<sub>6</sub>, 20 °C)

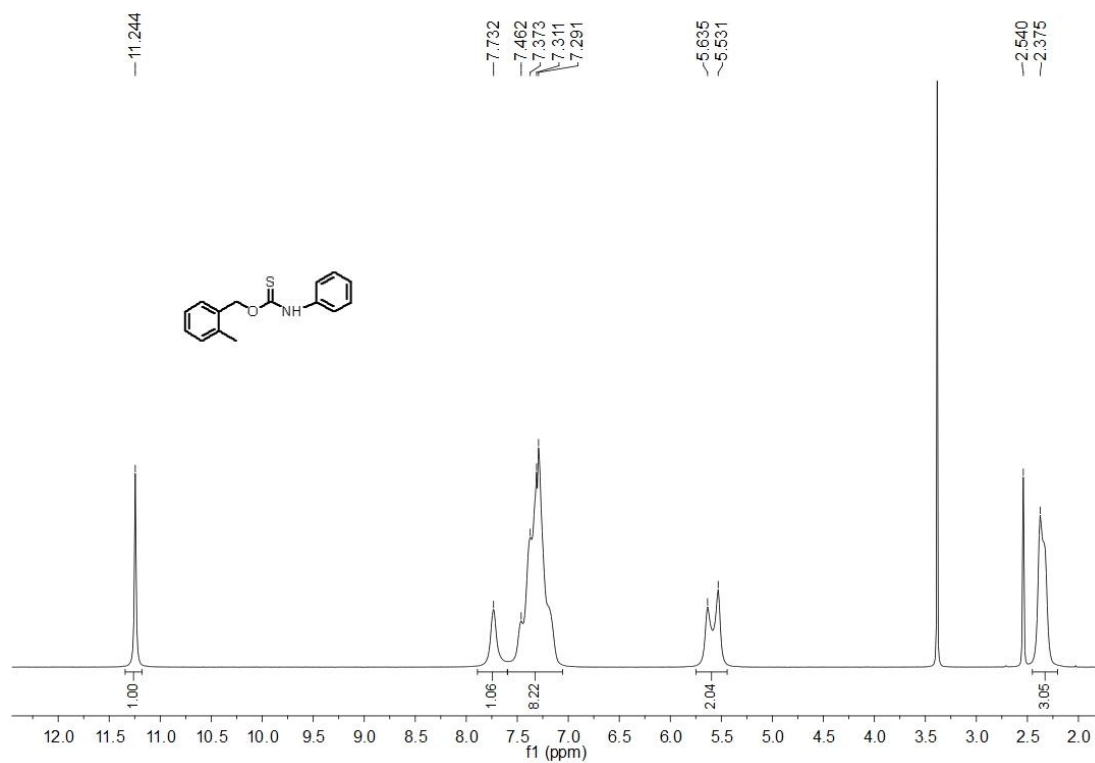

**Fig. S35.**  $^1\text{H}$  NMR spectrum of **3ba** (400 MHz,  $\text{DMSO-}d_6$ , 20 °C)

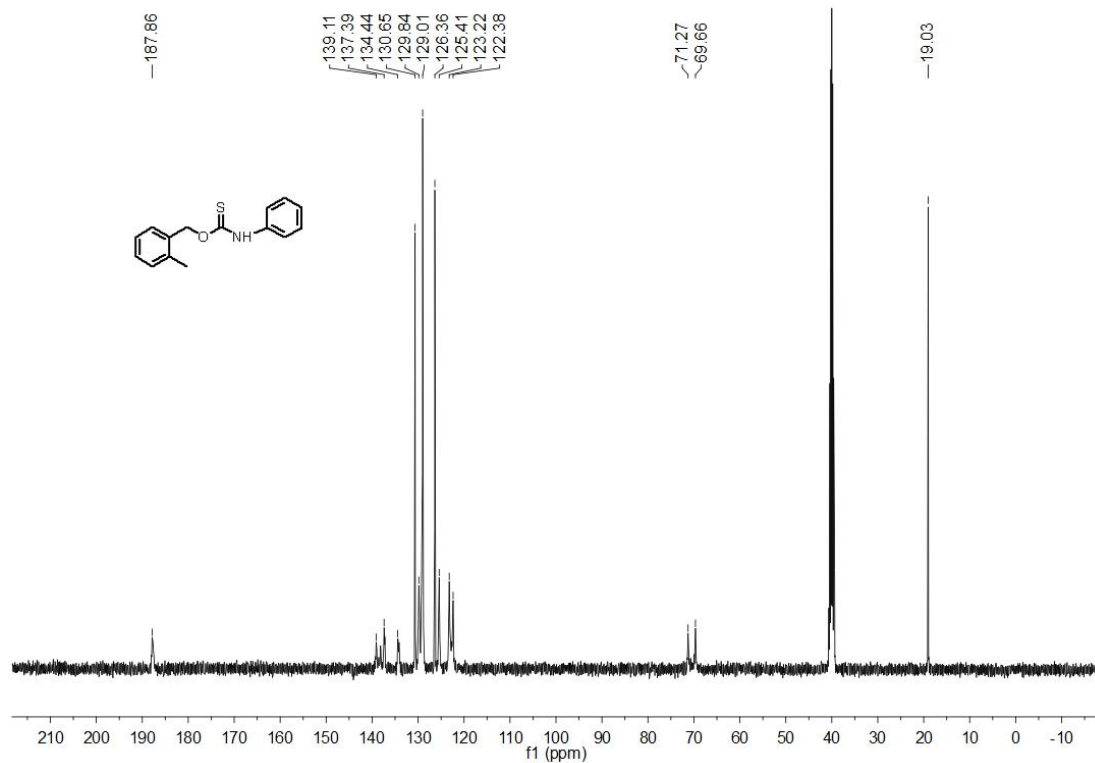

**Fig. S36.**  $^{13}\text{C}$  NMR spectrum of **3ba** (100 MHz,  $\text{DMSO-}d_6$ , 20 °C)



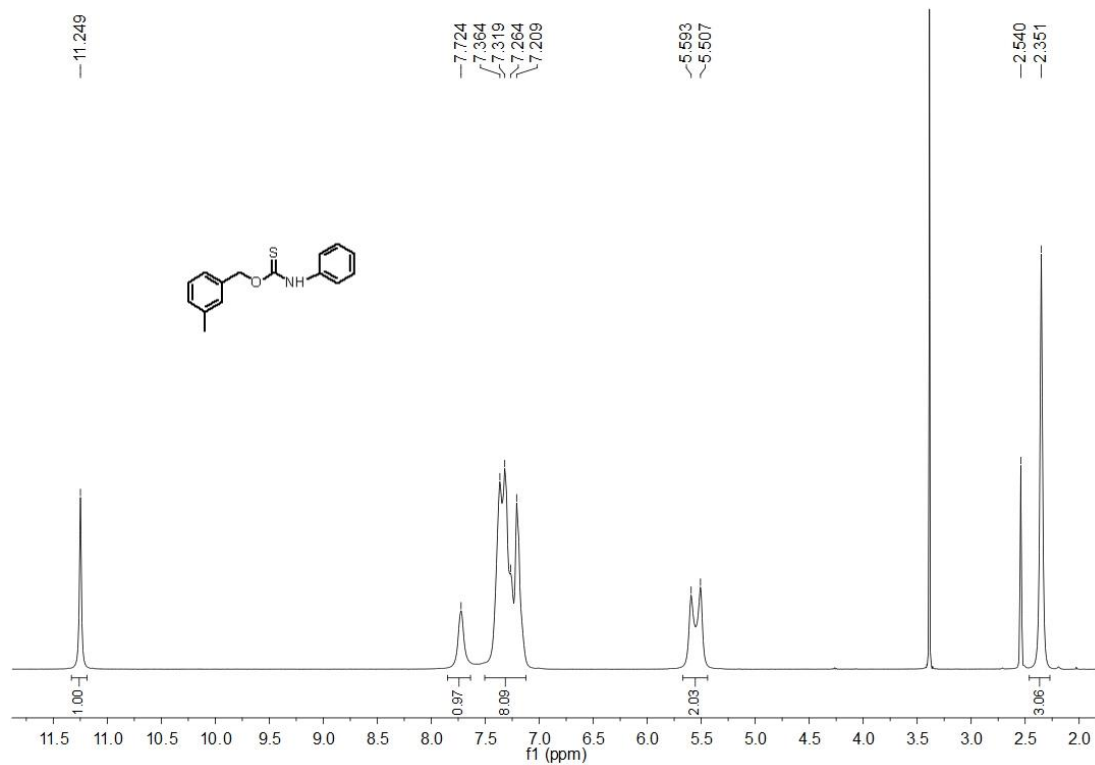

**Fig. S37.**  $^1\text{H}$  NMR spectrum of **3ca** (400 MHz,  $\text{DMSO-}d_6$ , 20 °C)

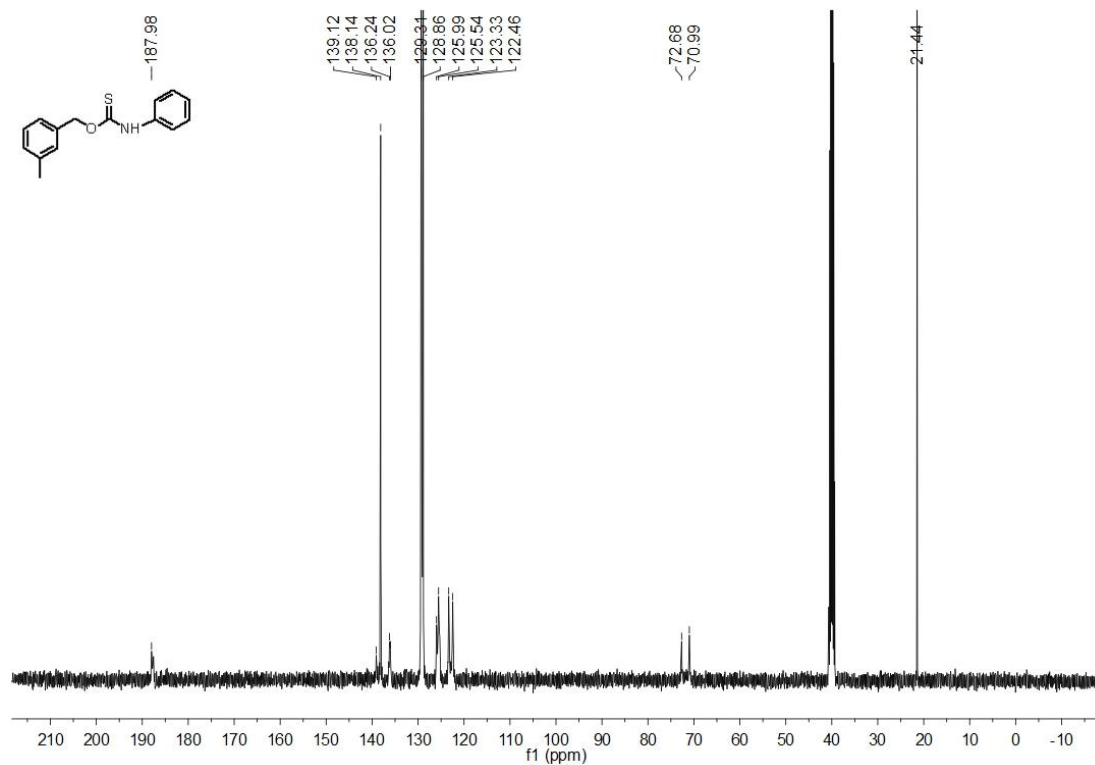

**Fig. S38.**  $^{13}\text{C}$  NMR spectrum of **3ca** (100 MHz,  $\text{DMSO-}d_6$ , 20 °C)

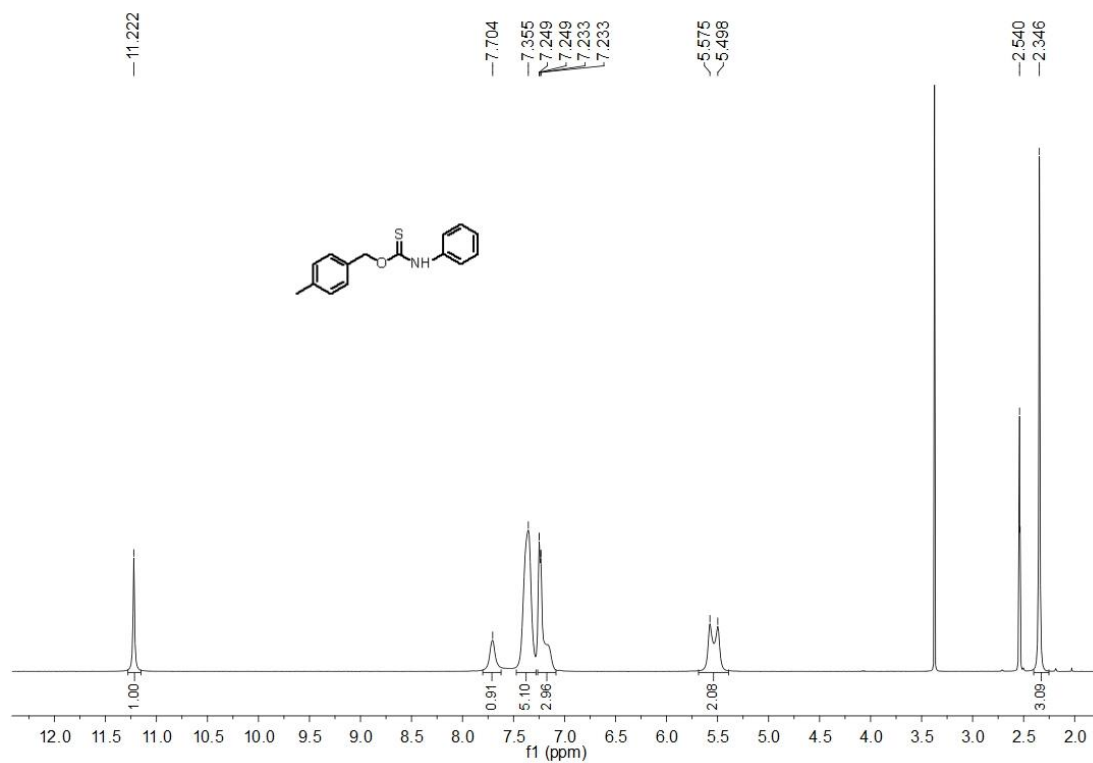

**Fig. S39.**  $^1\text{H}$  NMR spectrum of **3da** (400 MHz,  $\text{DMSO-}d_6$ , 20 °C)

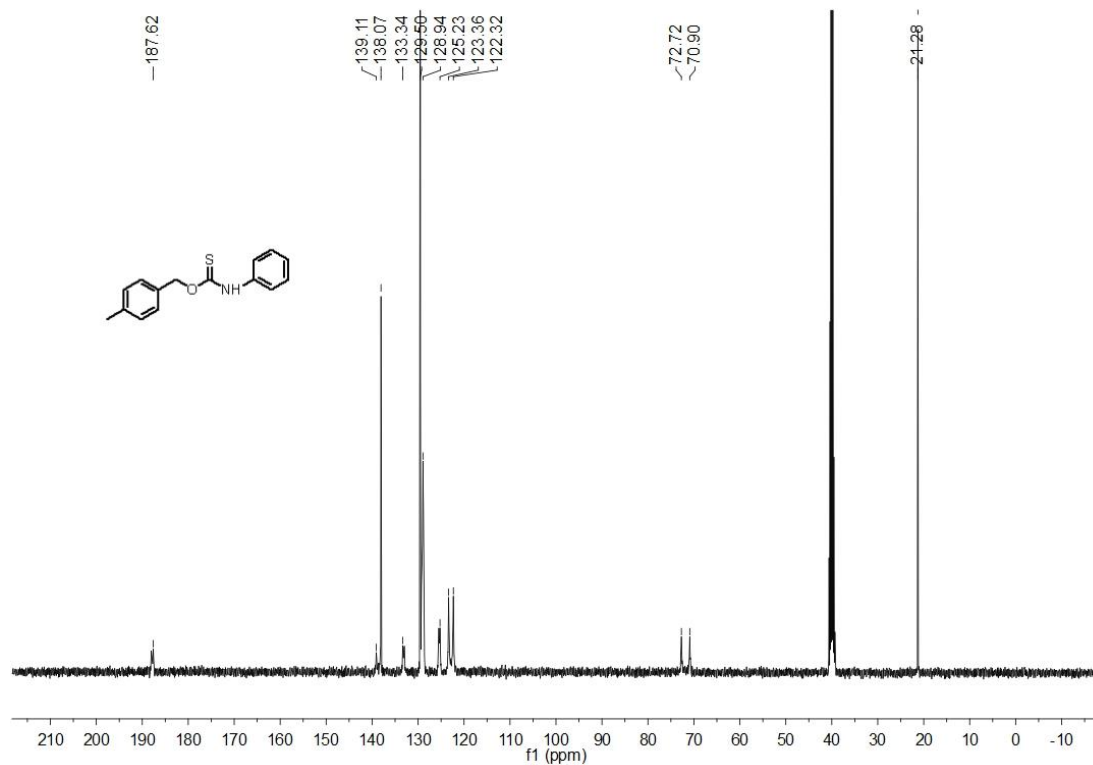

**Fig. S40.**  $^{13}\text{C}$  NMR spectrum of **3da** (100 MHz,  $\text{DMSO-}d_6$ , 20 °C)

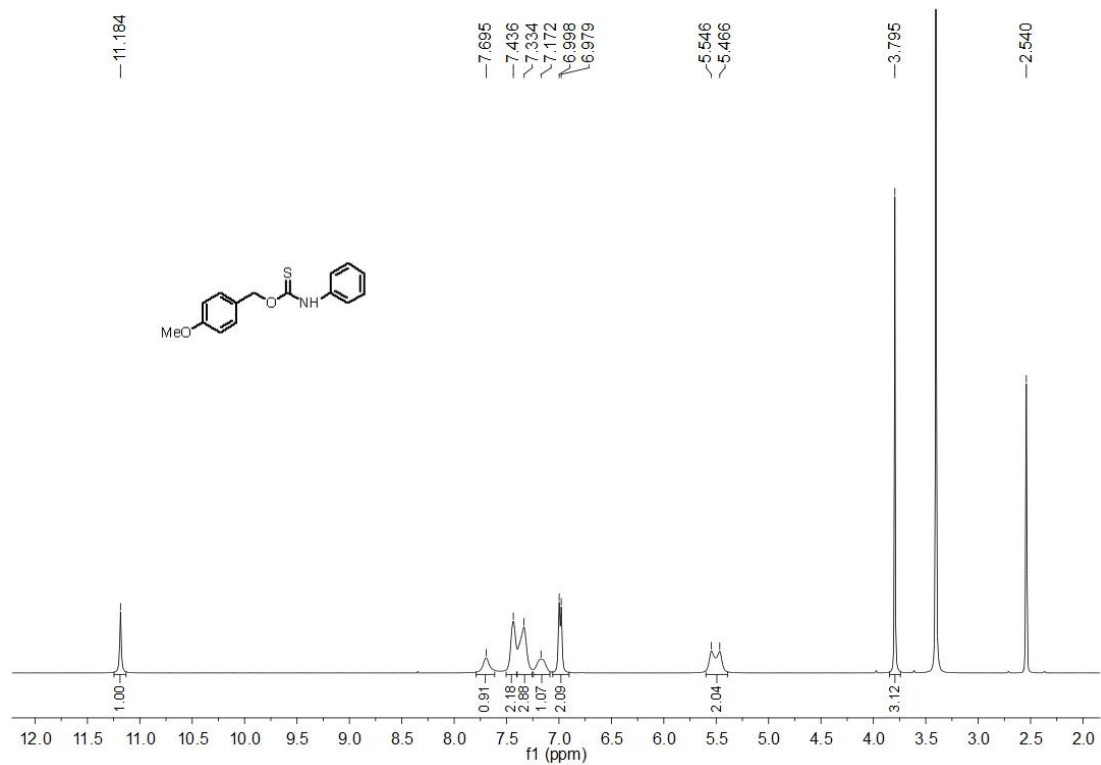

**Fig. S41.** <sup>1</sup>H NMR spectrum of 3ea (400 MHz, DMSO-*d*<sub>6</sub>, 20 °C)

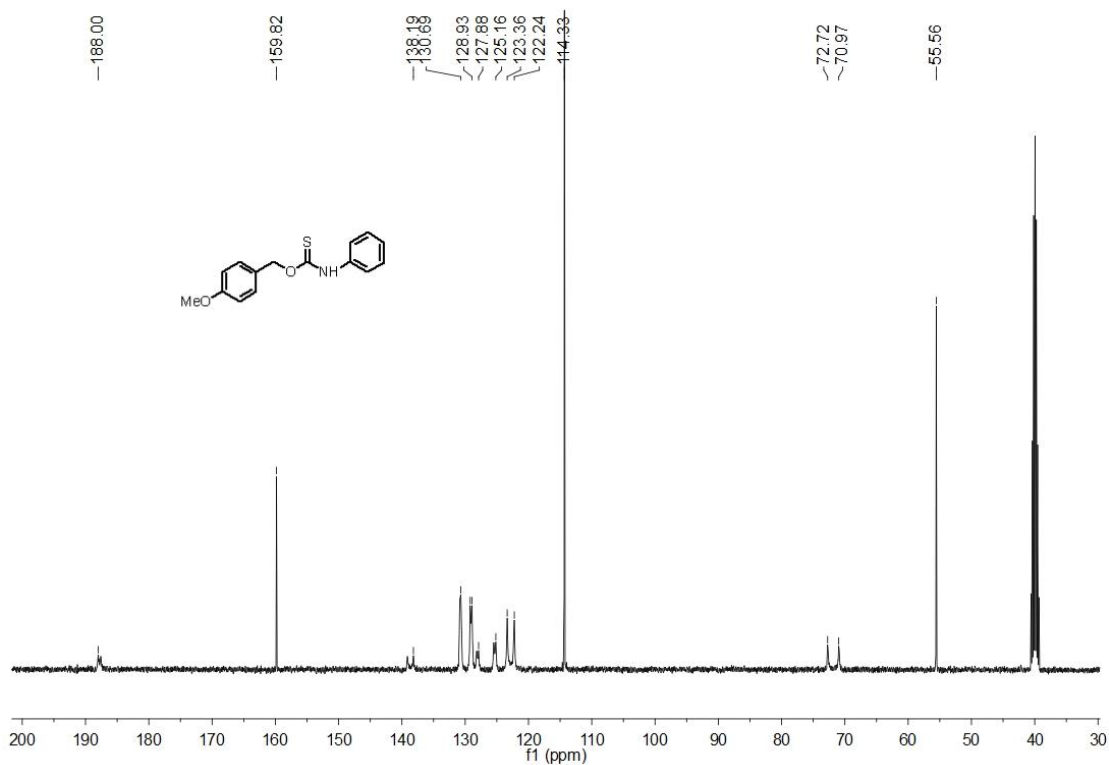

**Fig. S42.** <sup>13</sup>C NMR spectrum of 3ea (100 MHz, DMSO-*d*<sub>6</sub>, 20 °C)

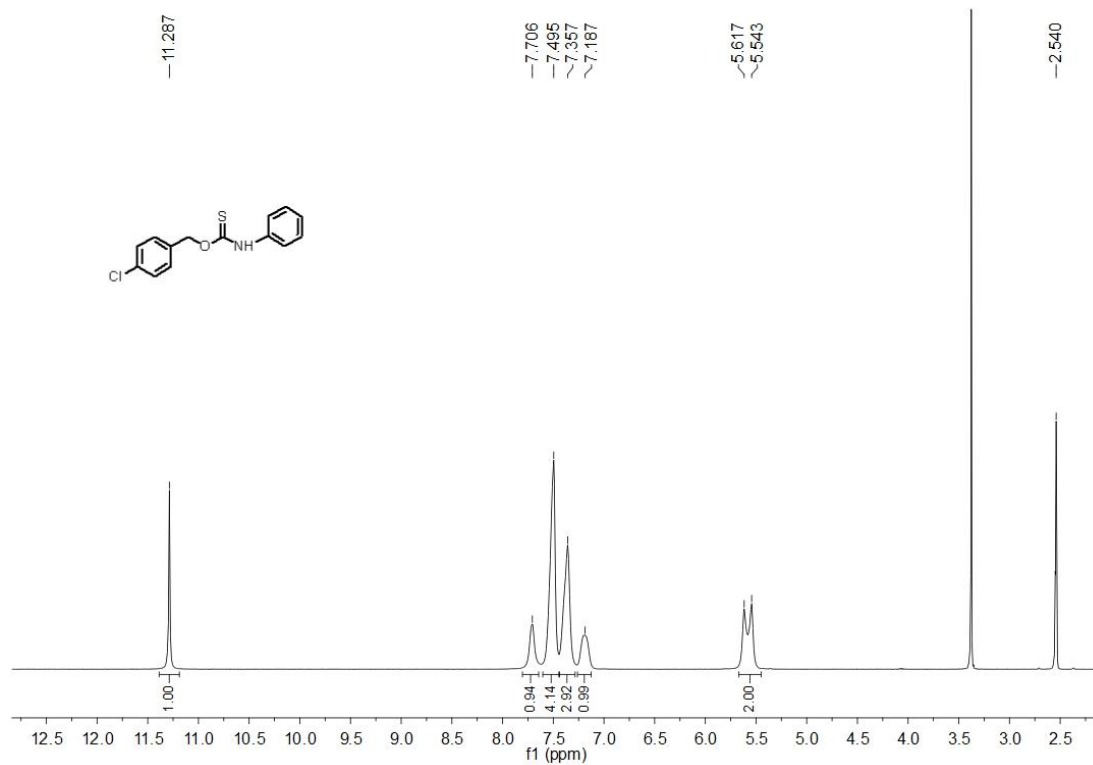

**Fig. S43.**  $^1\text{H}$  NMR spectrum of 3fa (400 MHz, DMSO- $d_6$ , 20 °C)

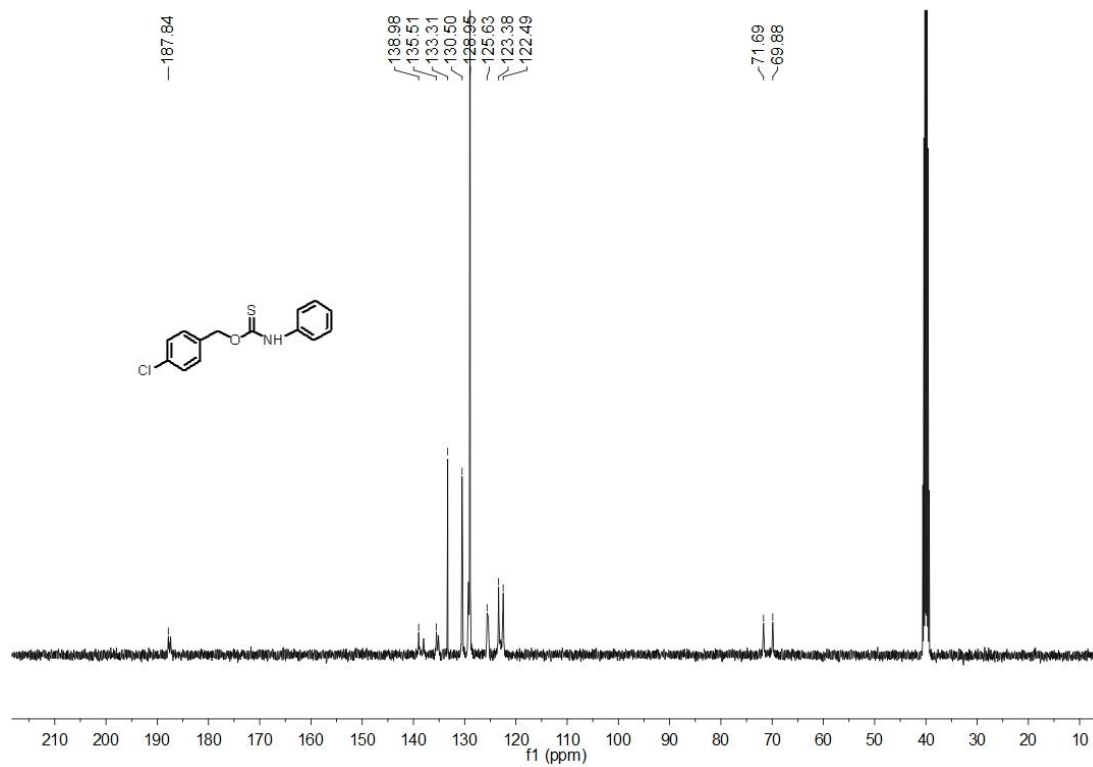

**Fig. S44.**  $^{13}\text{C}$  NMR spectrum of 3fa (100 MHz, DMSO- $d_6$ , 20 °C)

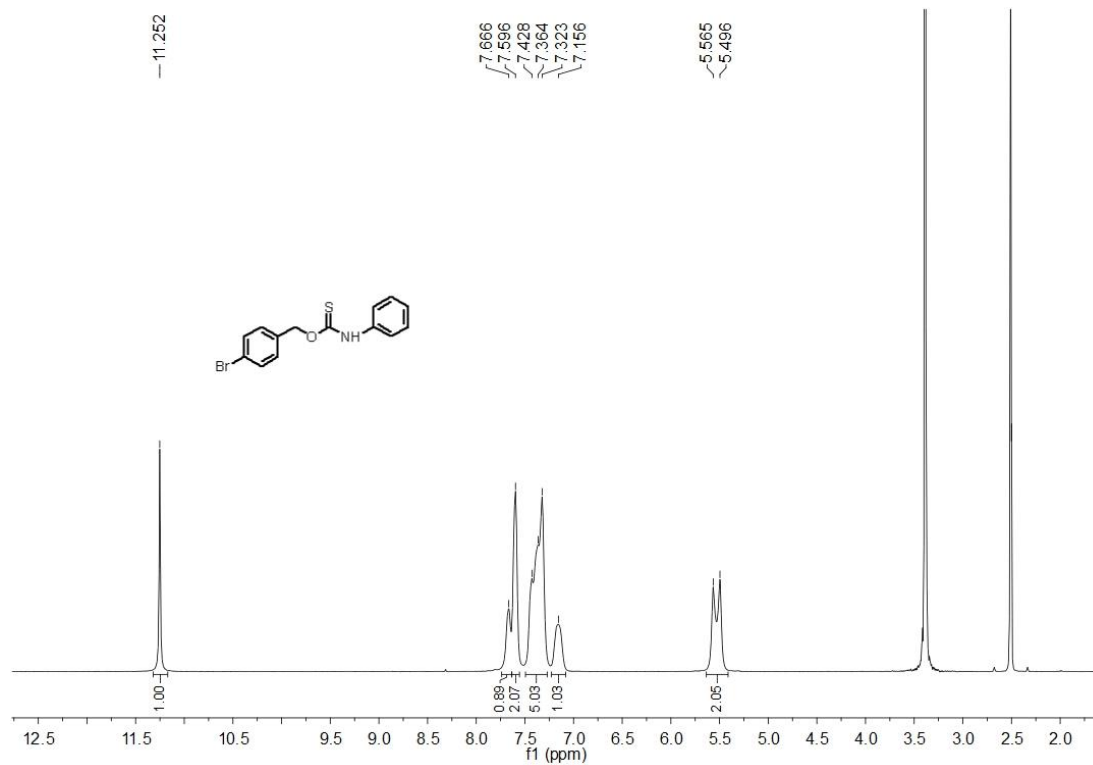

**Fig. S45.**  $^1\text{H NMR}$  spectrum of 3ga (400 MHz,  $\text{DMSO-}d_6$ , 20 °C)

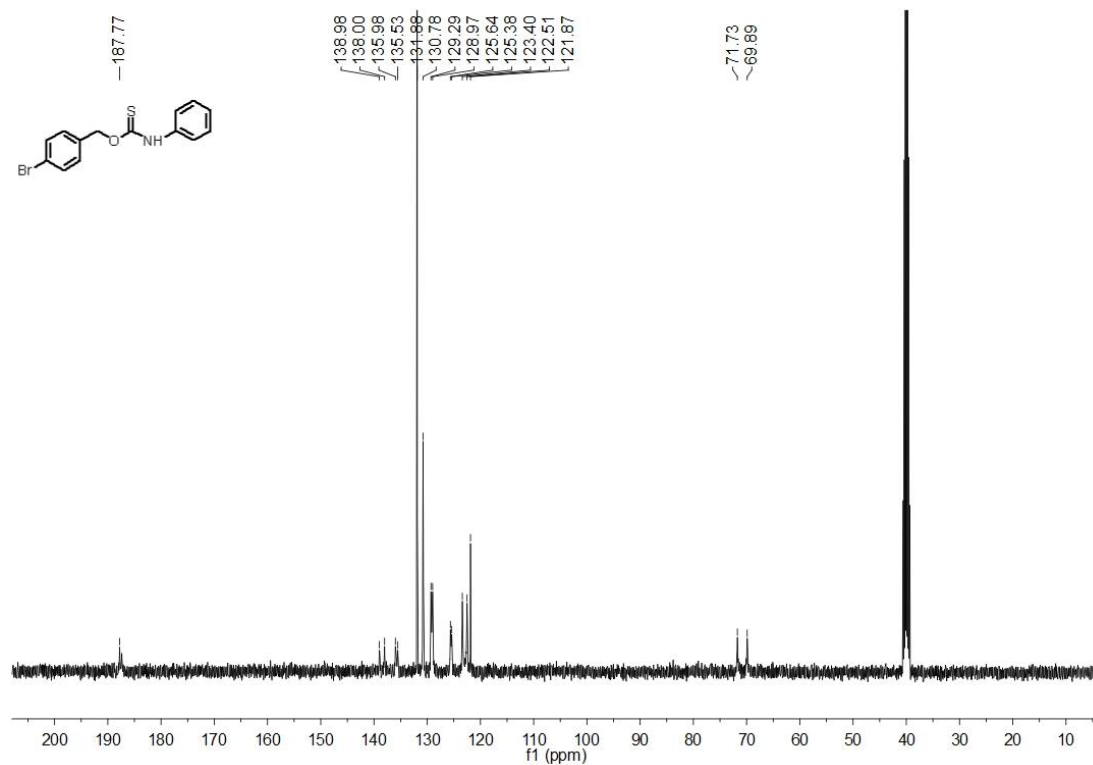

**Fig. S46.**  $^{13}\text{C NMR}$  spectrum of 3ga (100 MHz,  $\text{DMSO-}d_6$ , 20 °C)

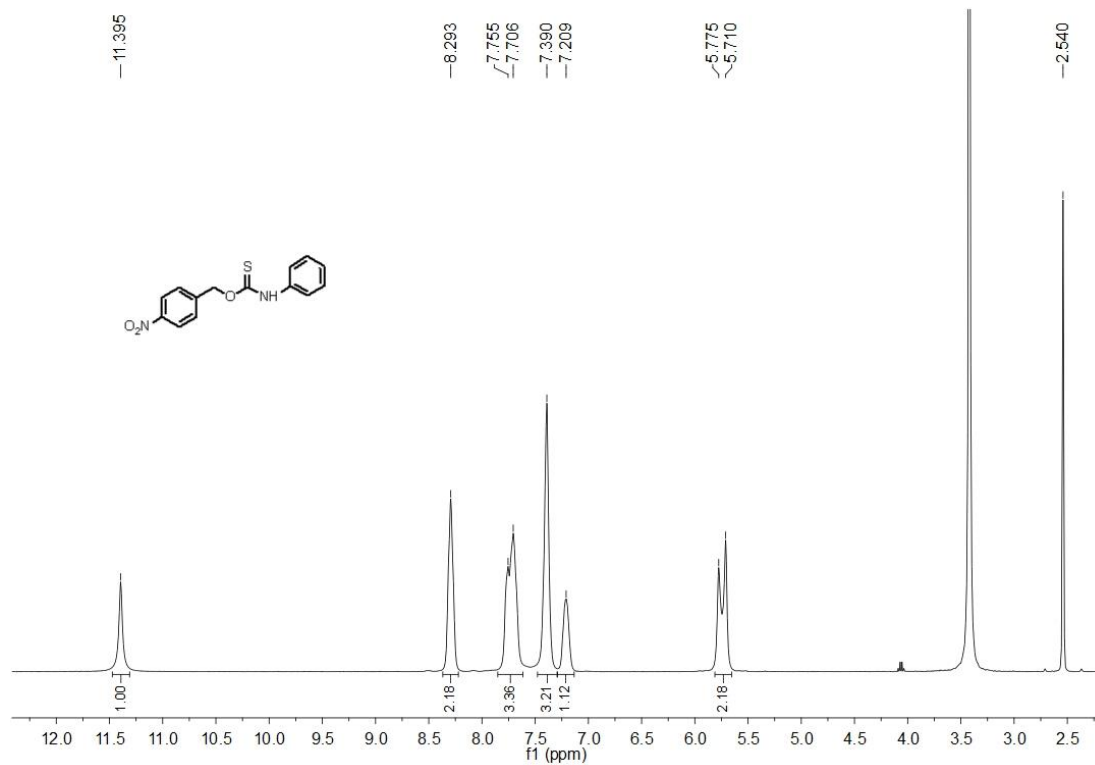

**Fig. S47.**  $^1\text{H}$  NMR spectrum of **3ha** (400 MHz,  $\text{DMSO-}d_6$ , 20 °C)

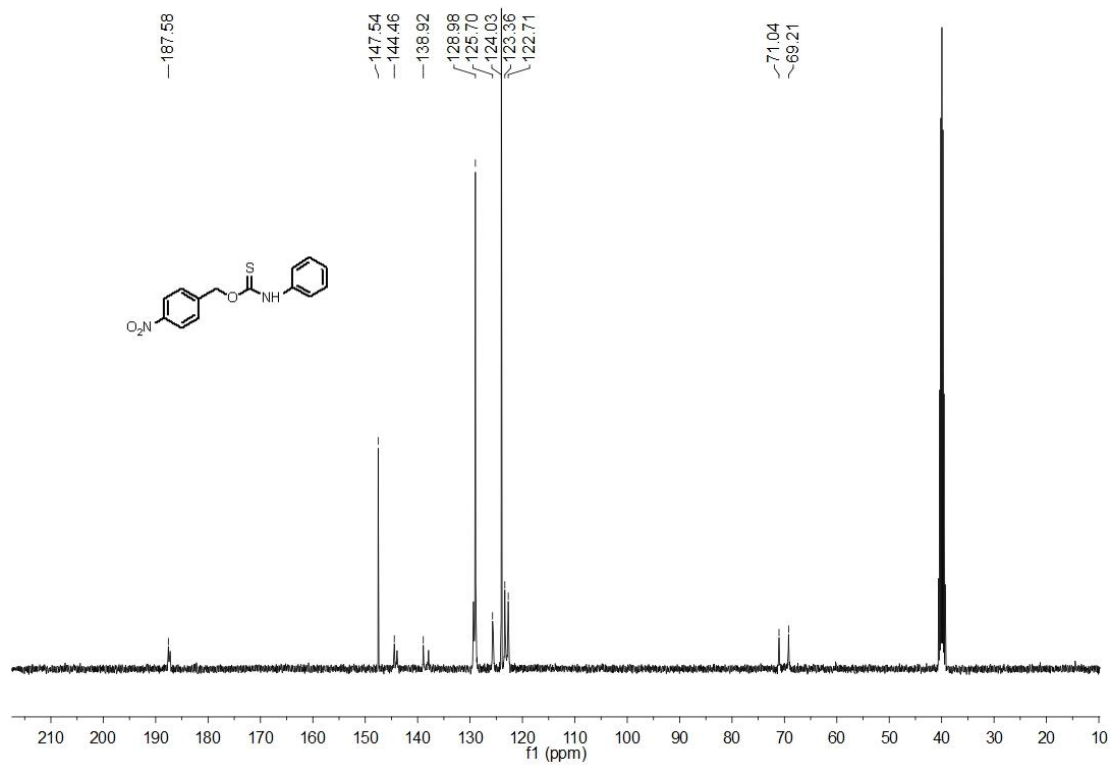

**Fig. S48.**  $^{13}\text{C}$  NMR spectrum of **3ha** (100 MHz,  $\text{DMSO-}d_6$ , 20 °C)

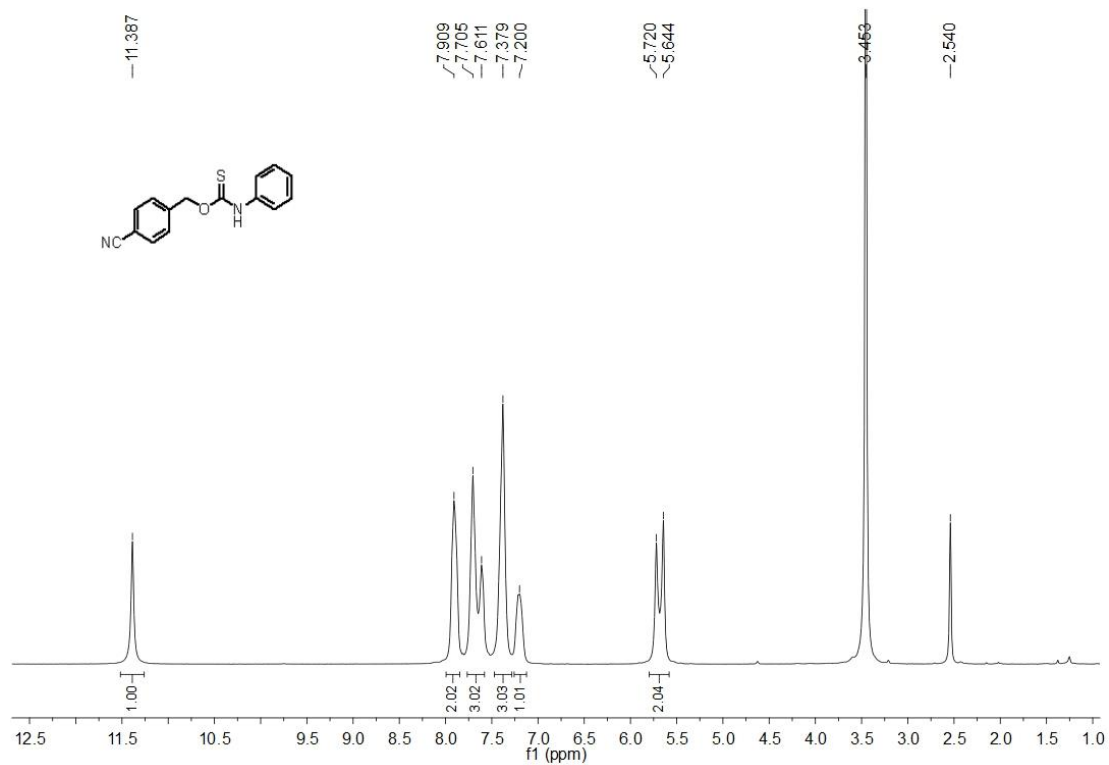

**Fig. S49.** <sup>1</sup>H NMR spectrum of 3ia (400 MHz, DMSO-*d*<sub>6</sub>, 20 °C)

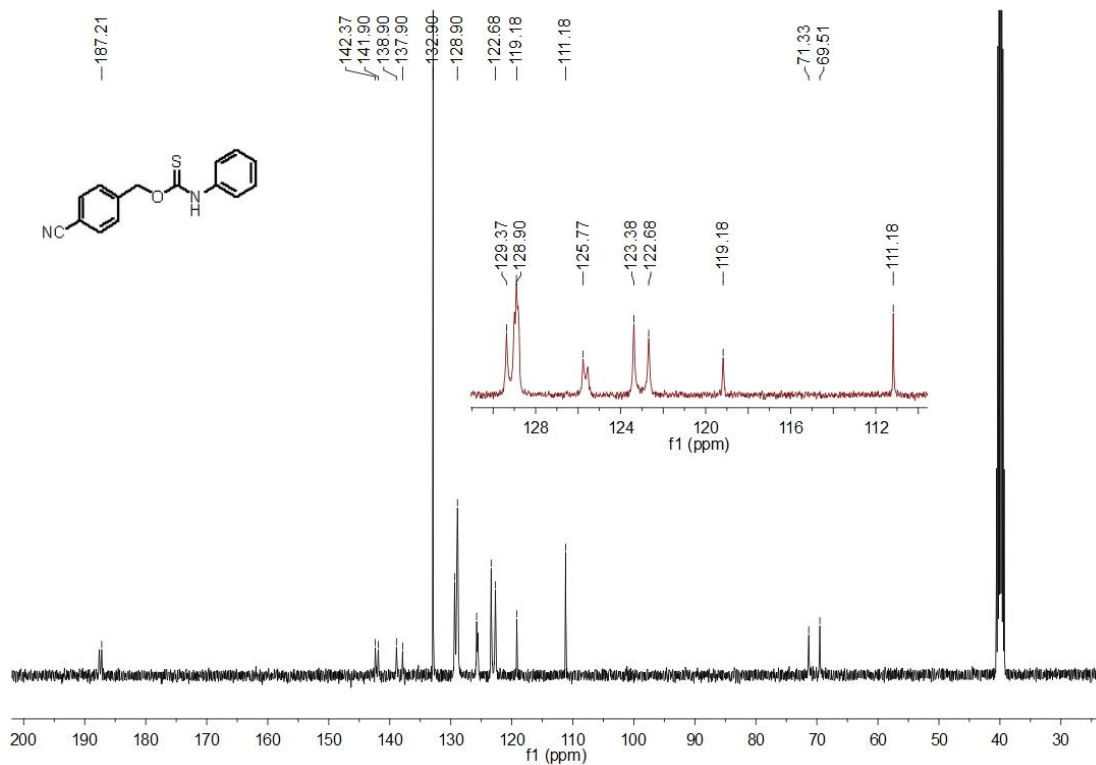

**Fig. S50.** <sup>13</sup>C NMR spectrum of 3ia (100 MHz, DMSO-*d*<sub>6</sub>, 20 °C)

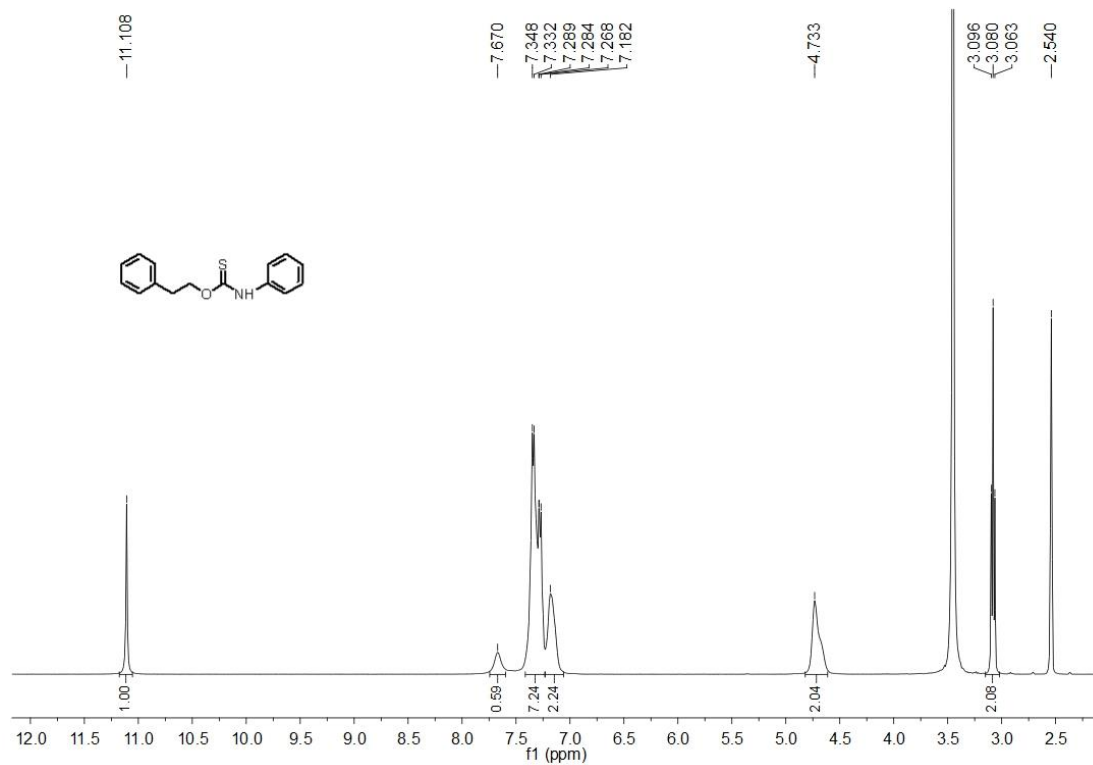

**Fig. S51.**  $^1\text{H}$  NMR spectrum of **3ja** (400 MHz,  $\text{DMSO-}d_6$ , 20 °C)

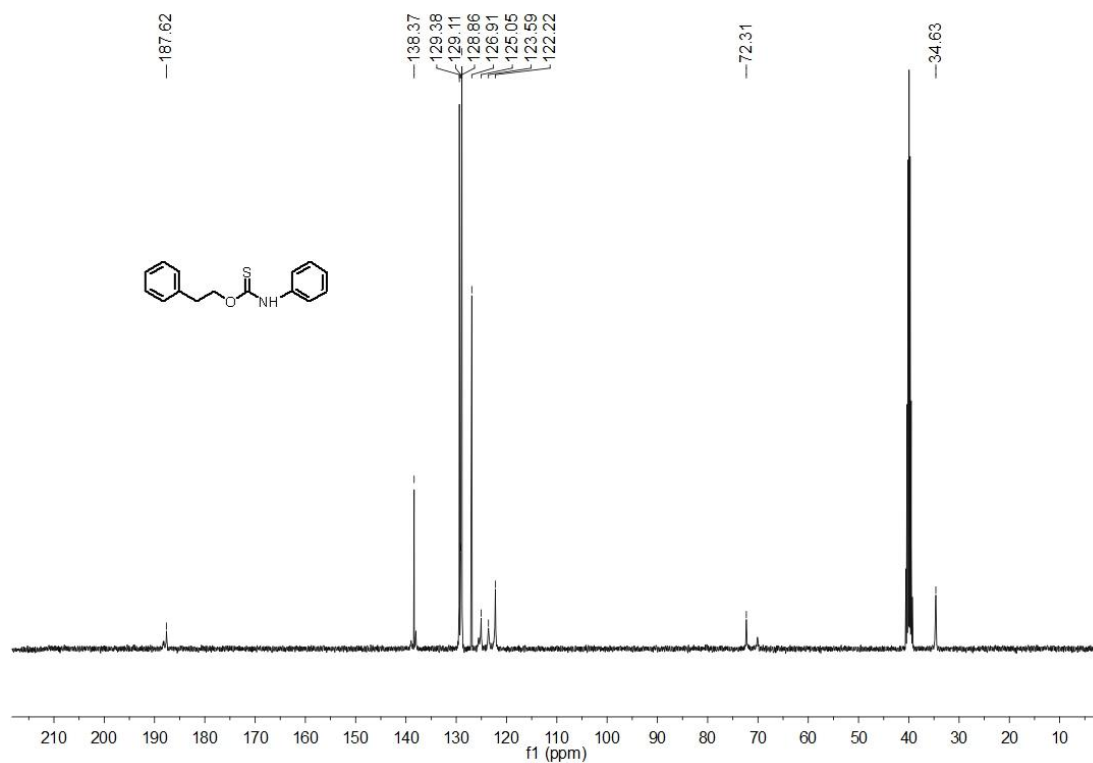

**Fig. S52.**  $^{13}\text{C}$  NMR spectrum of **3ja** (100 MHz,  $\text{DMSO-}d_6$ , 20 °C)



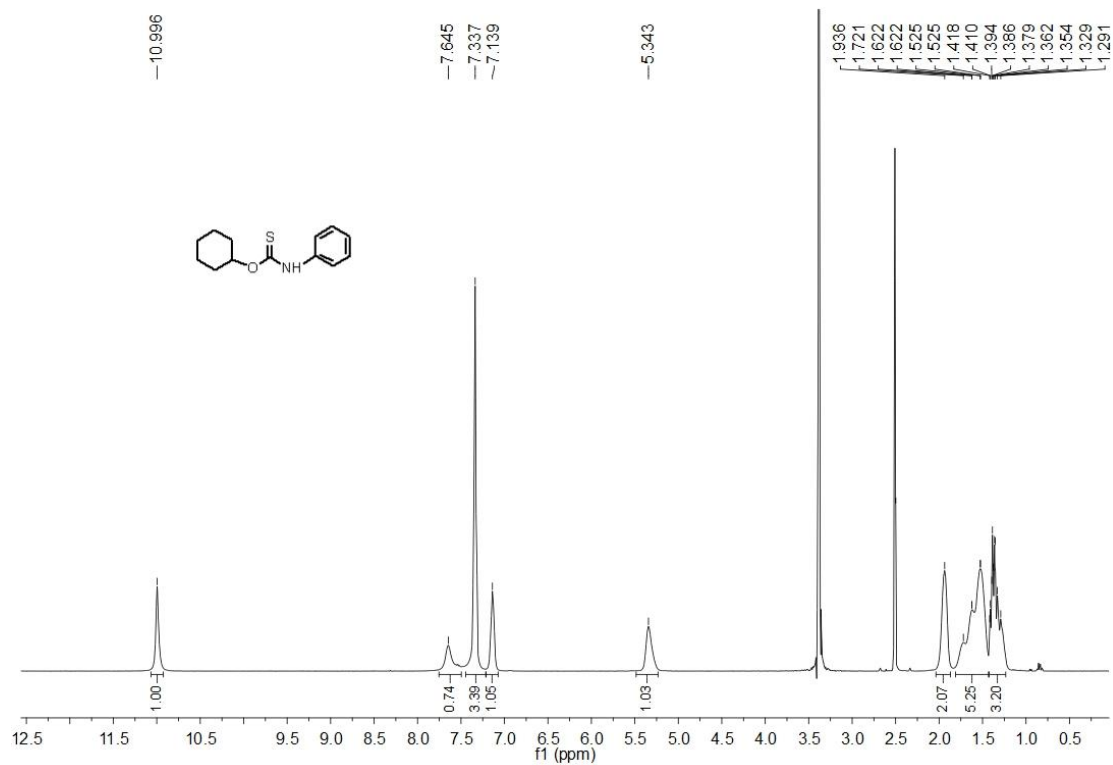

**Fig. S53.**  $^1\text{H}$  NMR spectrum of **3ka** (400 MHz,  $\text{DMSO-}d_6$ , 20 °C)

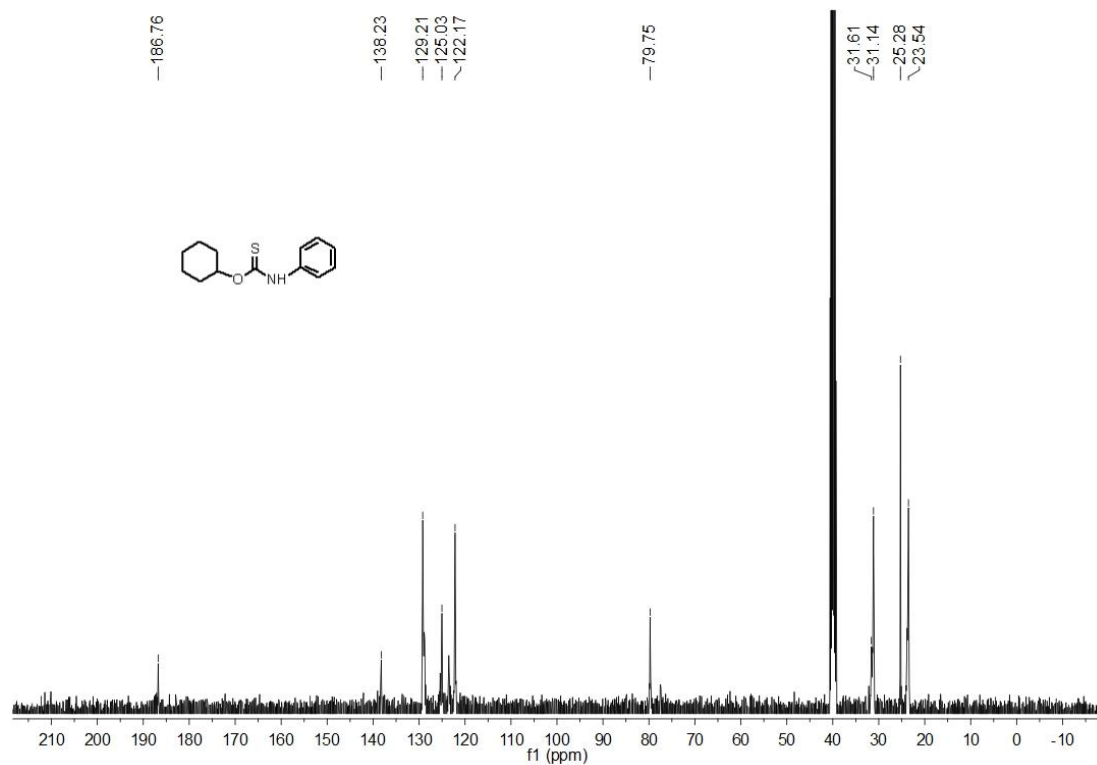

**Fig. S54.**  $^{13}\text{C}$  NMR spectrum of **3ka** (100 MHz,  $\text{DMSO-}d_6$ , 20 °C)

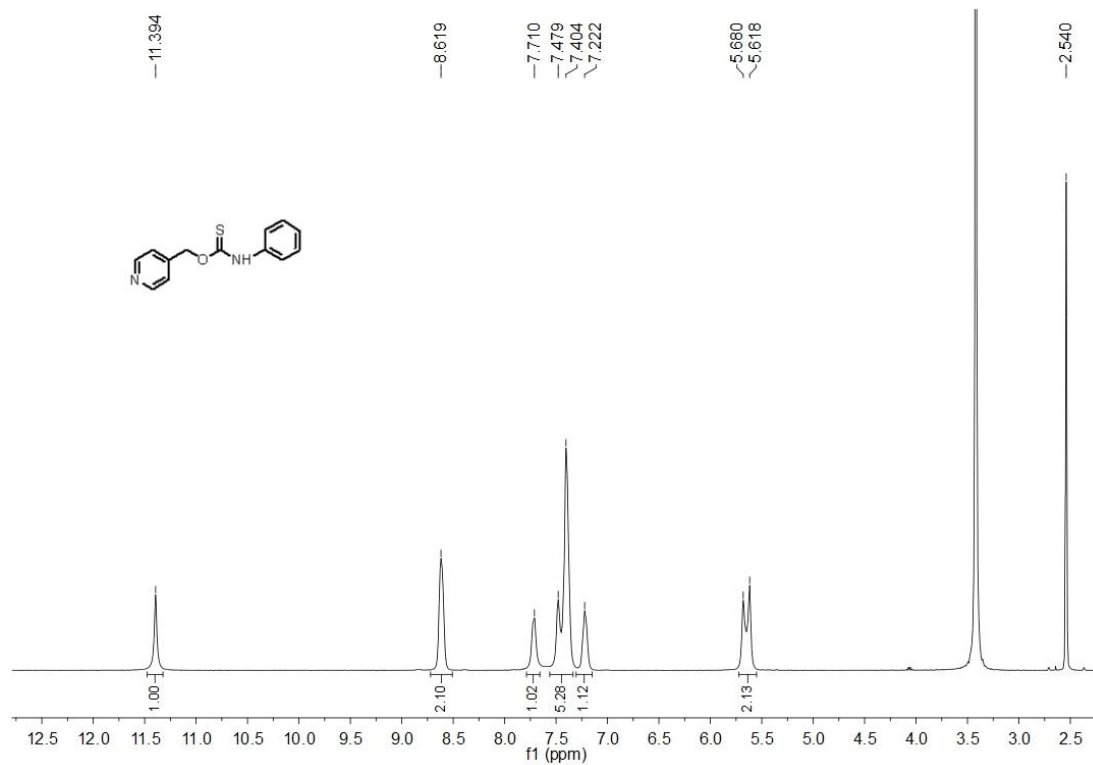

**Fig. S55.**  $^1\text{H}$  NMR spectrum of **3ma** (400 MHz,  $\text{DMSO-}d_6$ , 20 °C)

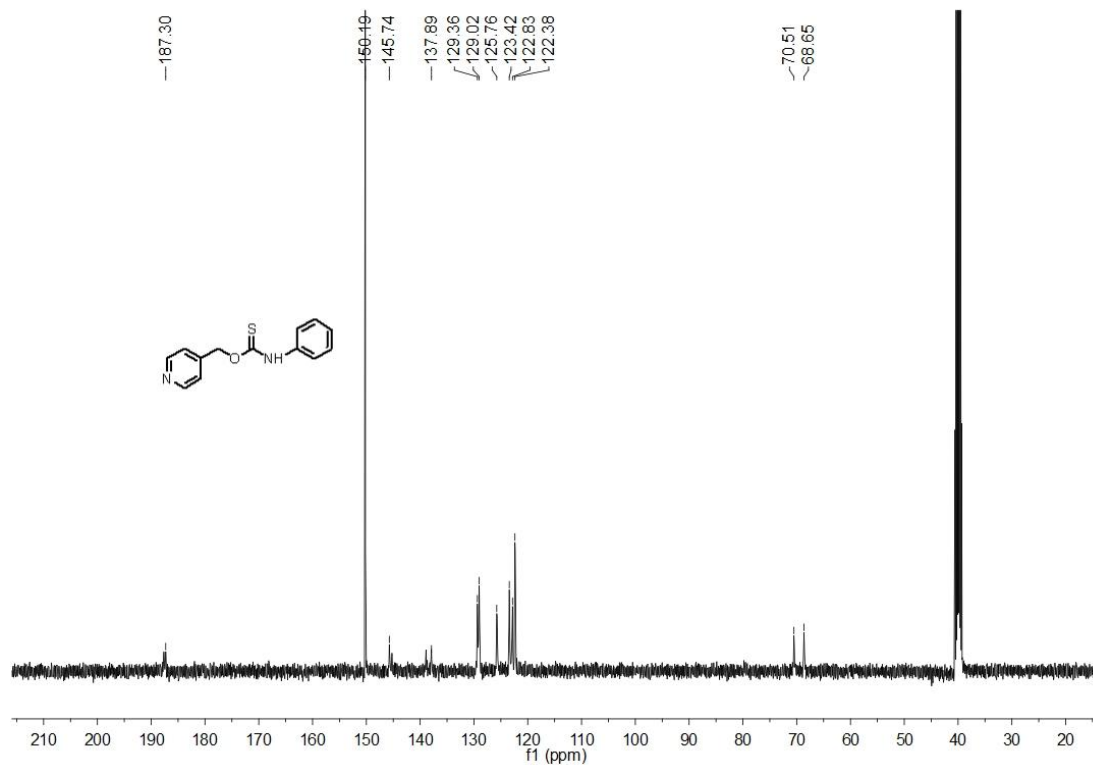

**Fig. S56.**  $^{13}\text{C}$  NMR spectrum of **3ma** (100 MHz,  $\text{DMSO-}d_6$ , 20 °C)

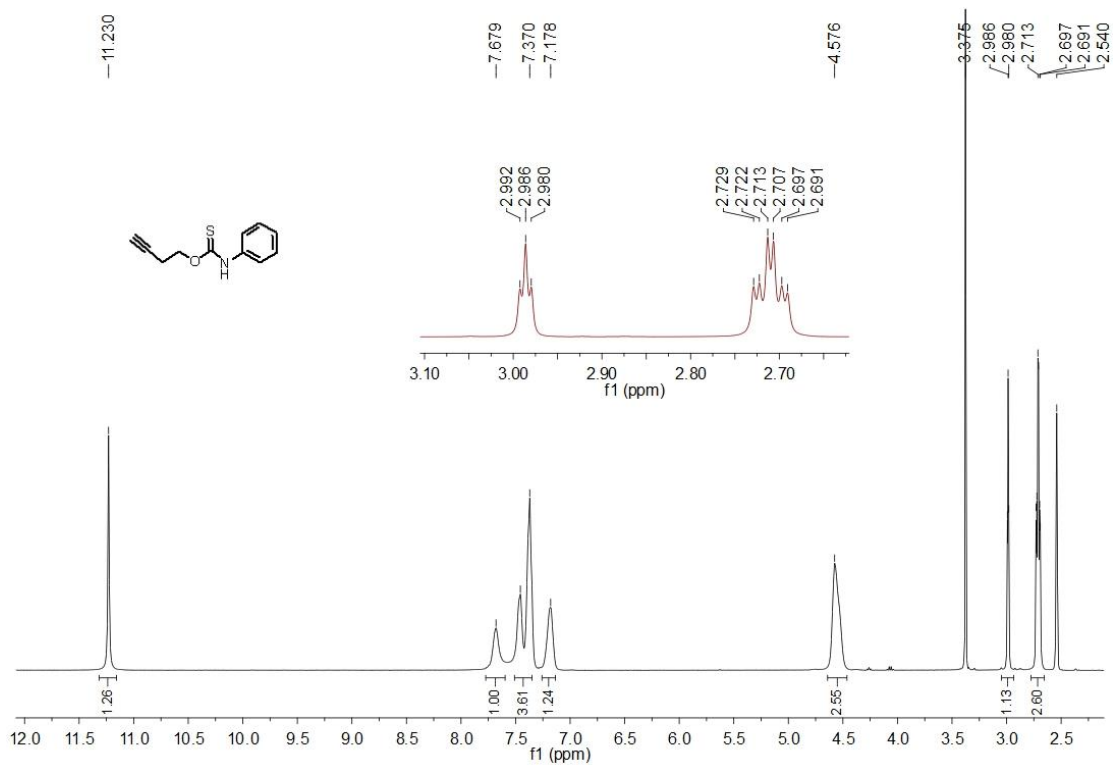

**Fig. S57.** <sup>1</sup>H NMR spectrum of **3na** (400 MHz, DMSO-*d*<sub>6</sub>, 20 °C)

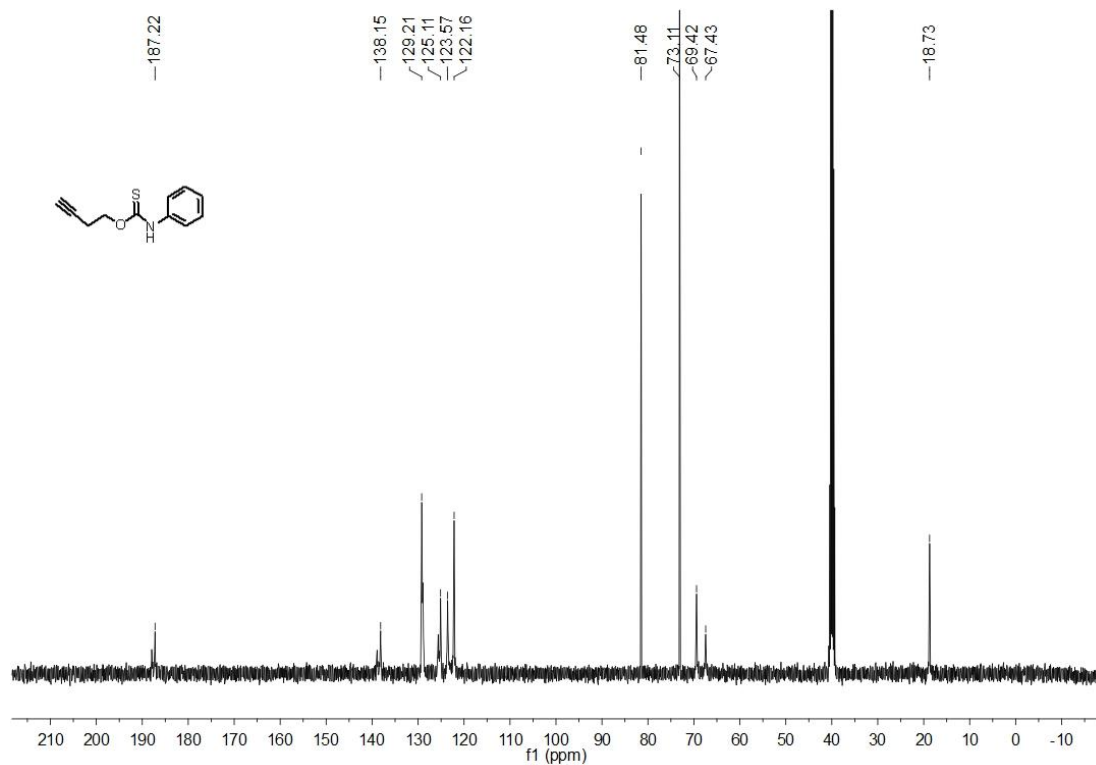

**Fig. S58.** <sup>13</sup>C NMR spectrum of **3na** (100 MHz, DMSO-*d*<sub>6</sub>, 20 °C)

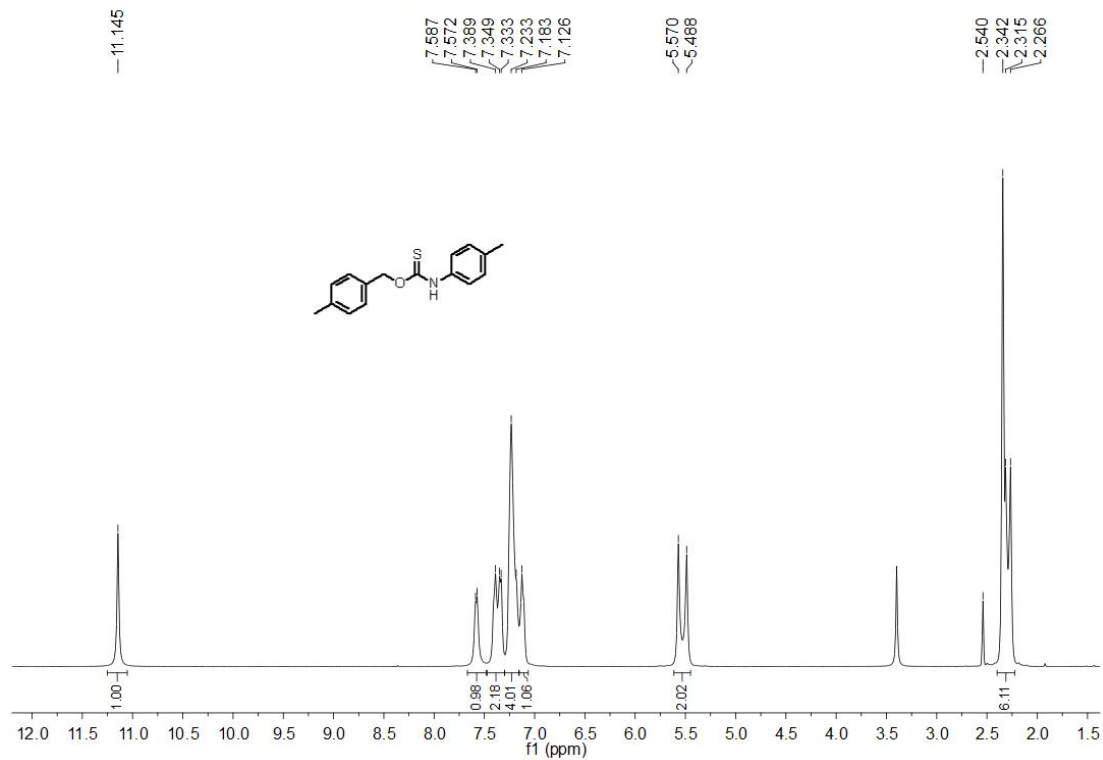

**Fig. S59.**  $^1\text{H}$  NMR spectrum of **3dd** (400 MHz,  $\text{DMSO-}d_6$ , 20 °C)

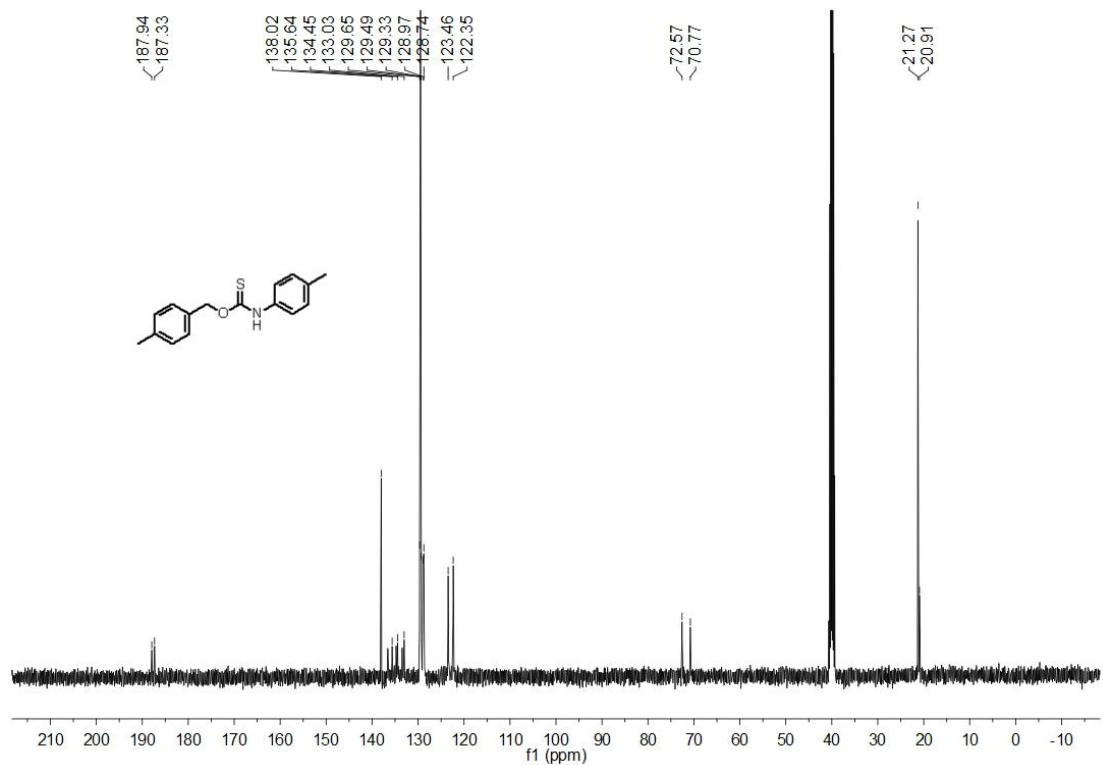

**Fig. S60.**  $^{13}\text{C}$  NMR spectrum of **3dd** (100 MHz,  $\text{DMSO-}d_6$ , 20 °C)

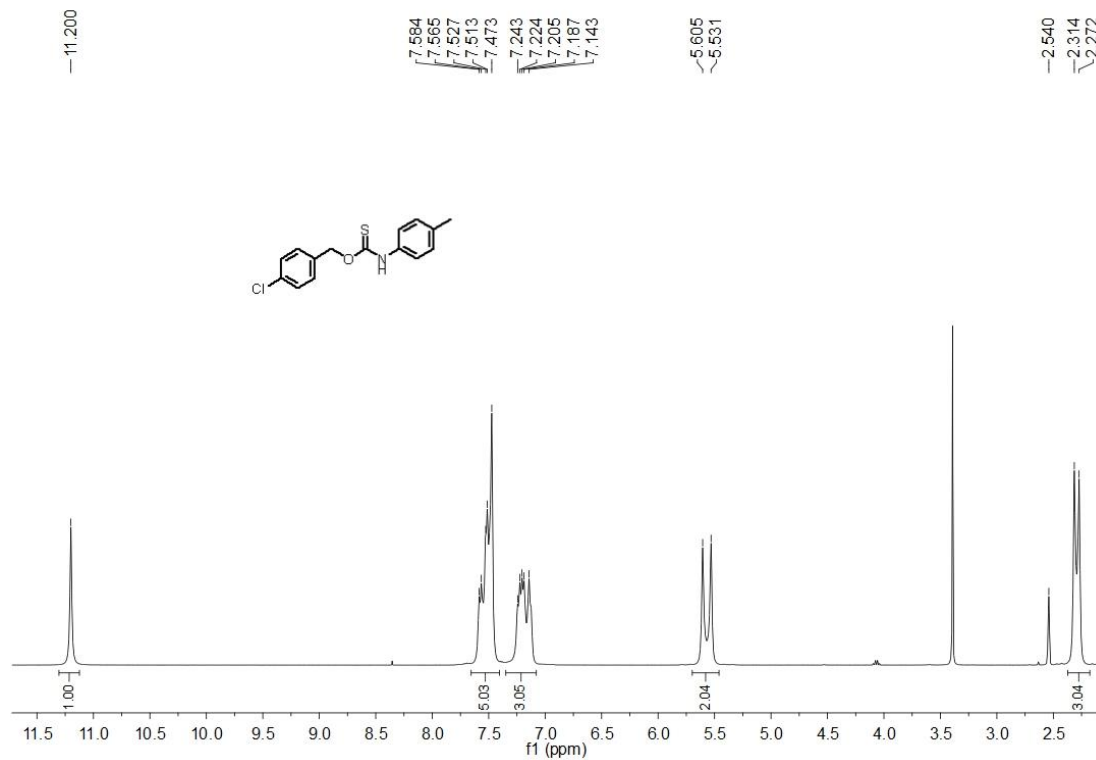

**Fig. S61.**  $^1\text{H NMR}$  spectrum of 3fd (400 MHz, DMSO- $d_6$ , 20 °C)

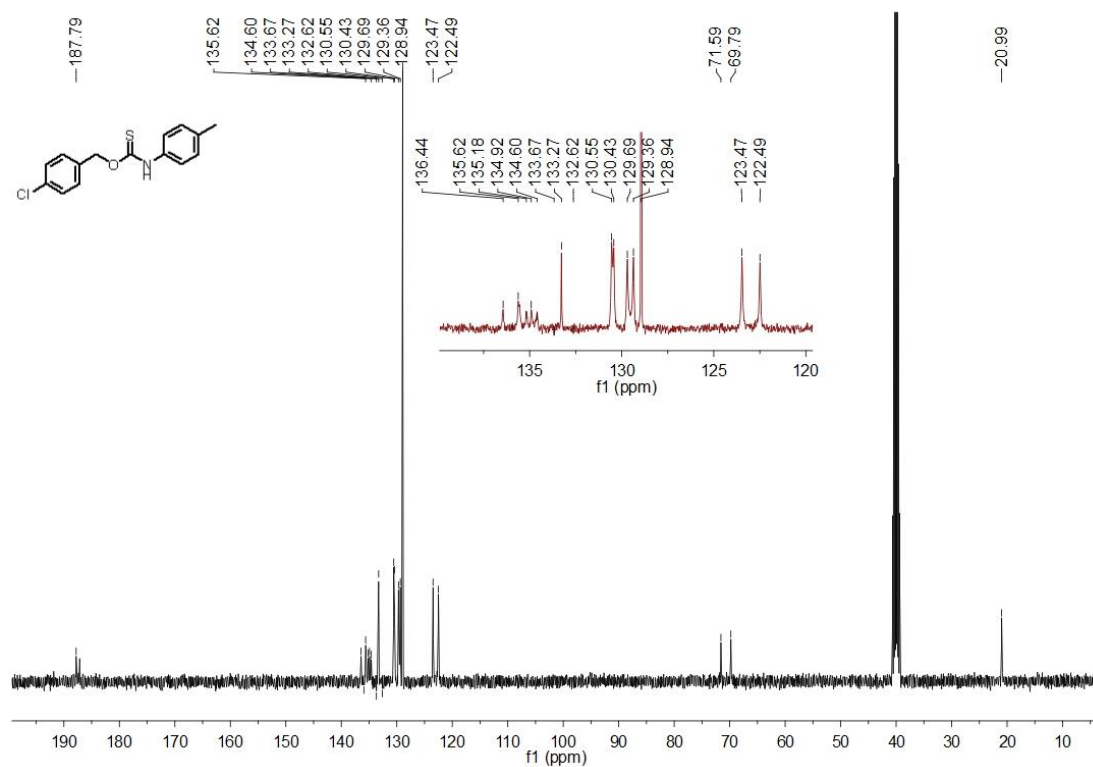

**Fig. S62.**  $^{13}\text{C NMR}$  spectrum of 3fd (100 MHz, DMSO- $d_6$ , 20 °C)

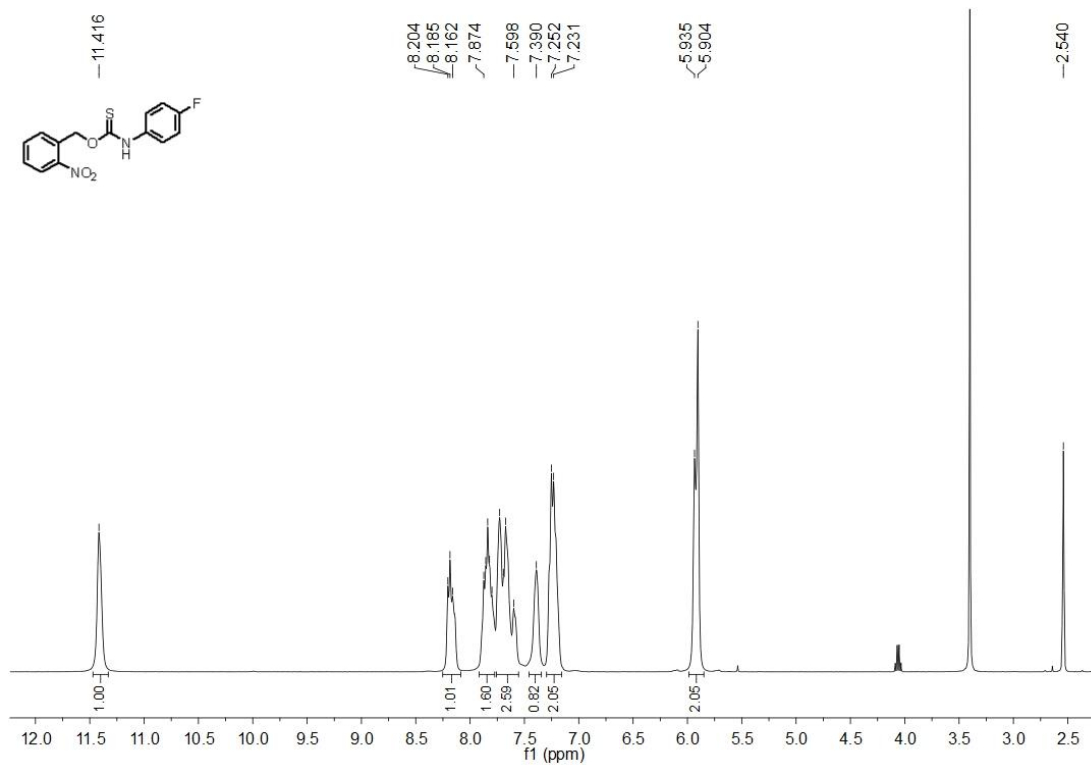

**Fig. S63.** <sup>1</sup>H NMR spectrum of 3of (400 MHz, DMSO-*d*<sub>6</sub>, 20 °C)

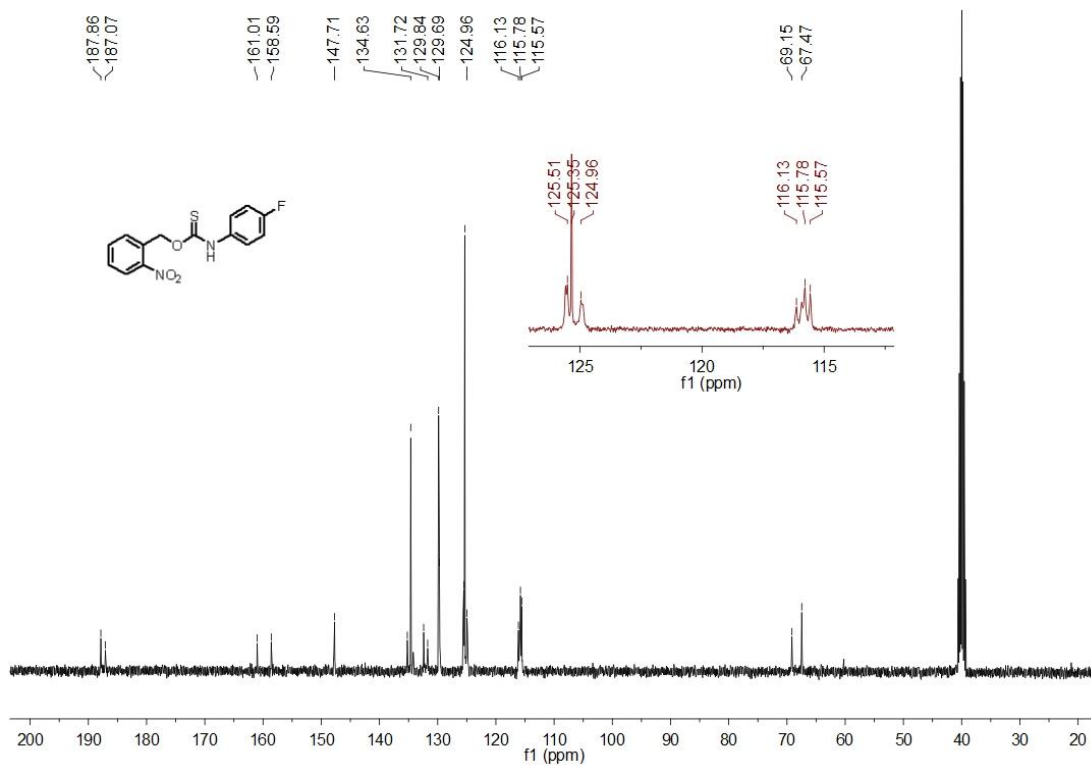

**Fig. S64.** <sup>13</sup>C NMR spectrum of 3of (100 MHz, DMSO-*d*<sub>6</sub>, 20 °C)

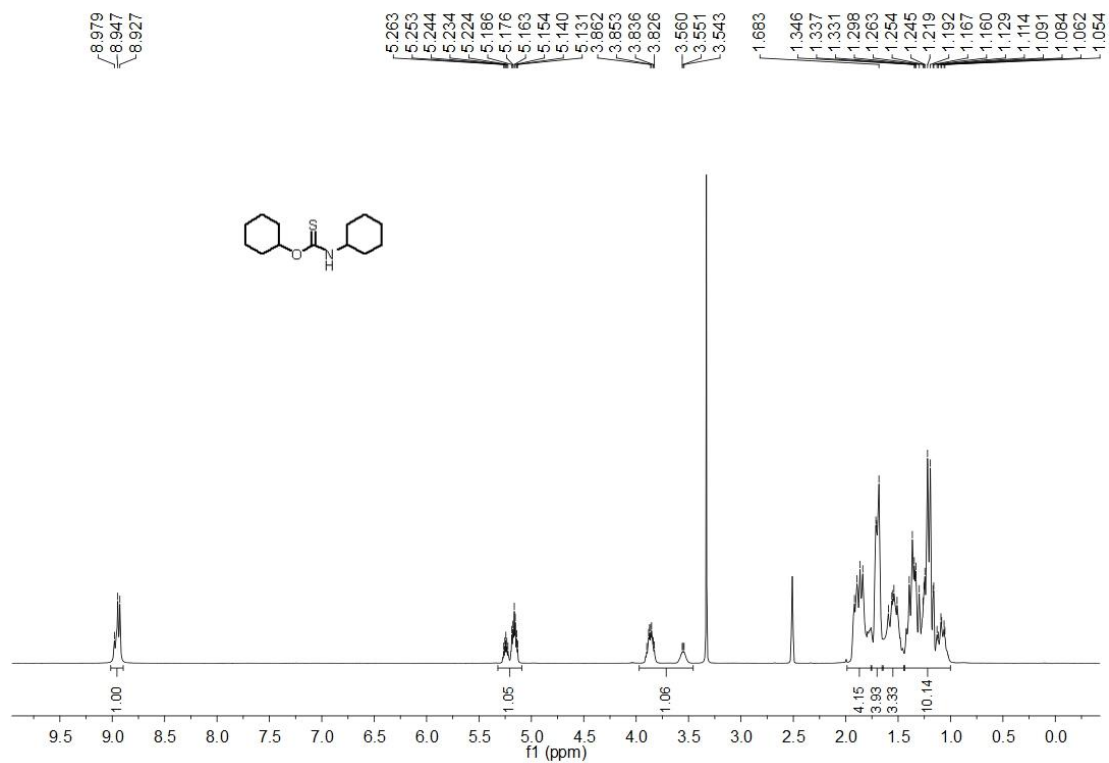

Fig. S65. <sup>1</sup>H NMR spectrum of 3kj (400 MHz, DMSO-*d*<sub>6</sub>, 20 °C)

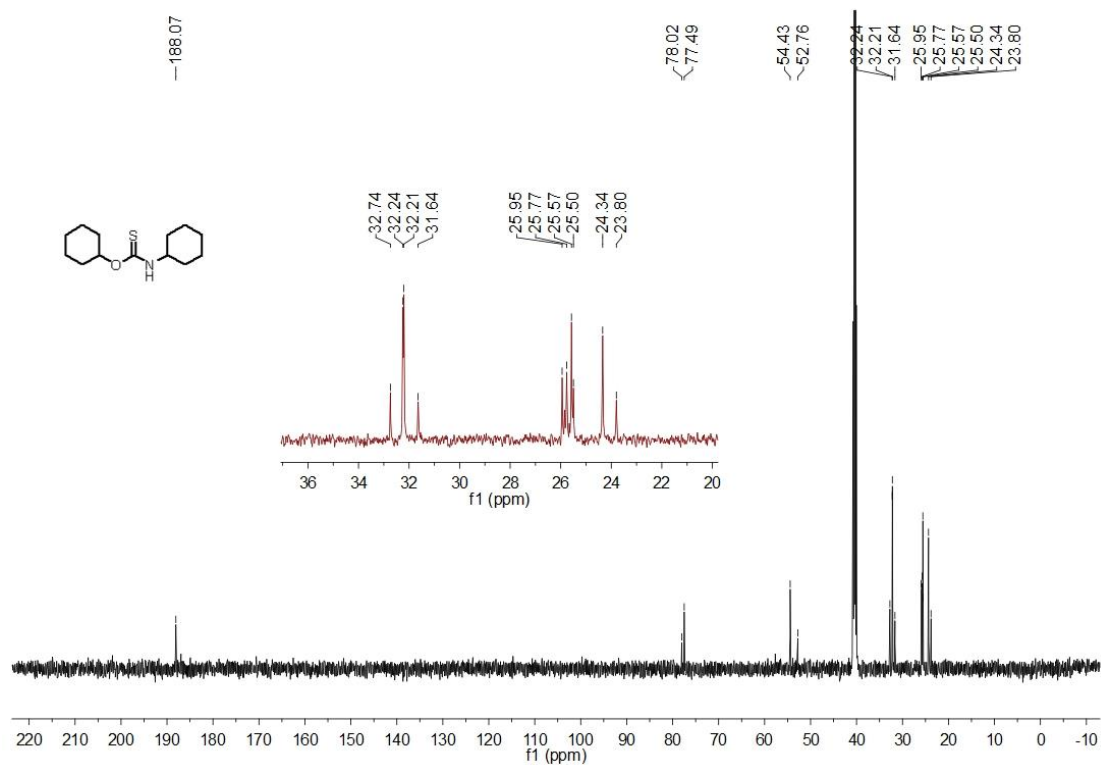

Fig. S66. <sup>13</sup>C NMR spectrum of 3kj (100 MHz, DMSO-*d*<sub>6</sub>, 20 °C)

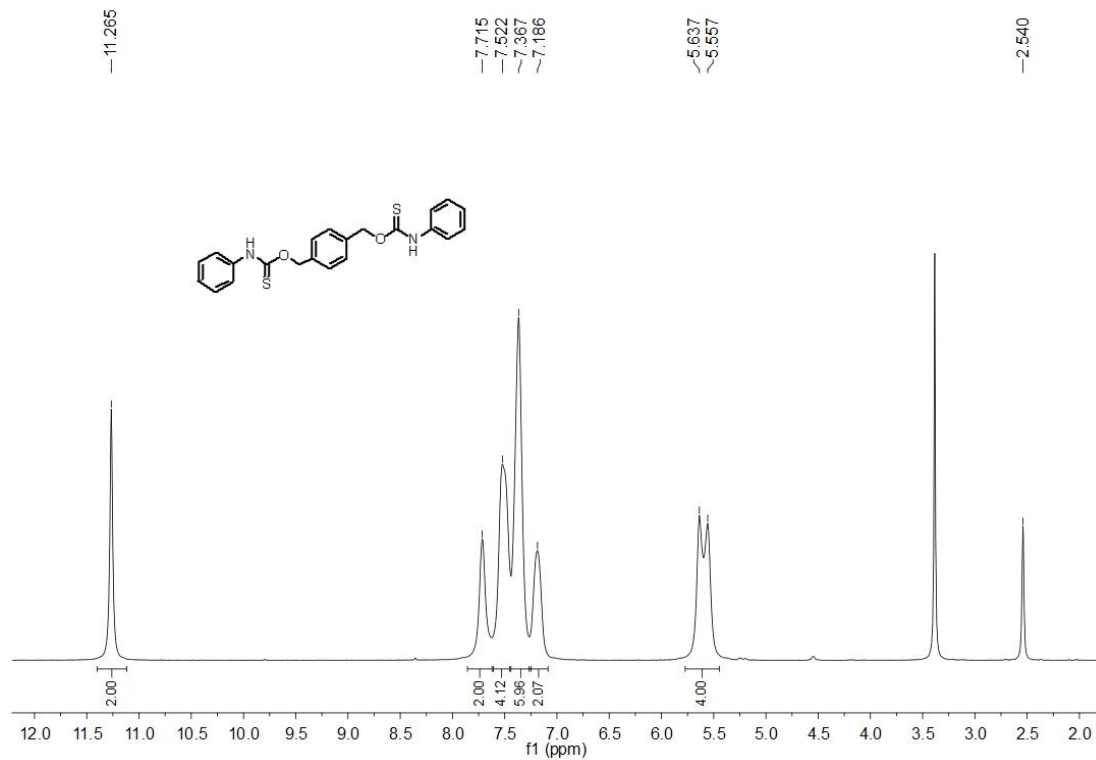

**Fig. S67.**  $^1\text{H}$  NMR spectrum of 3pa (400 MHz, DMSO- $d_6$ , 20 °C)

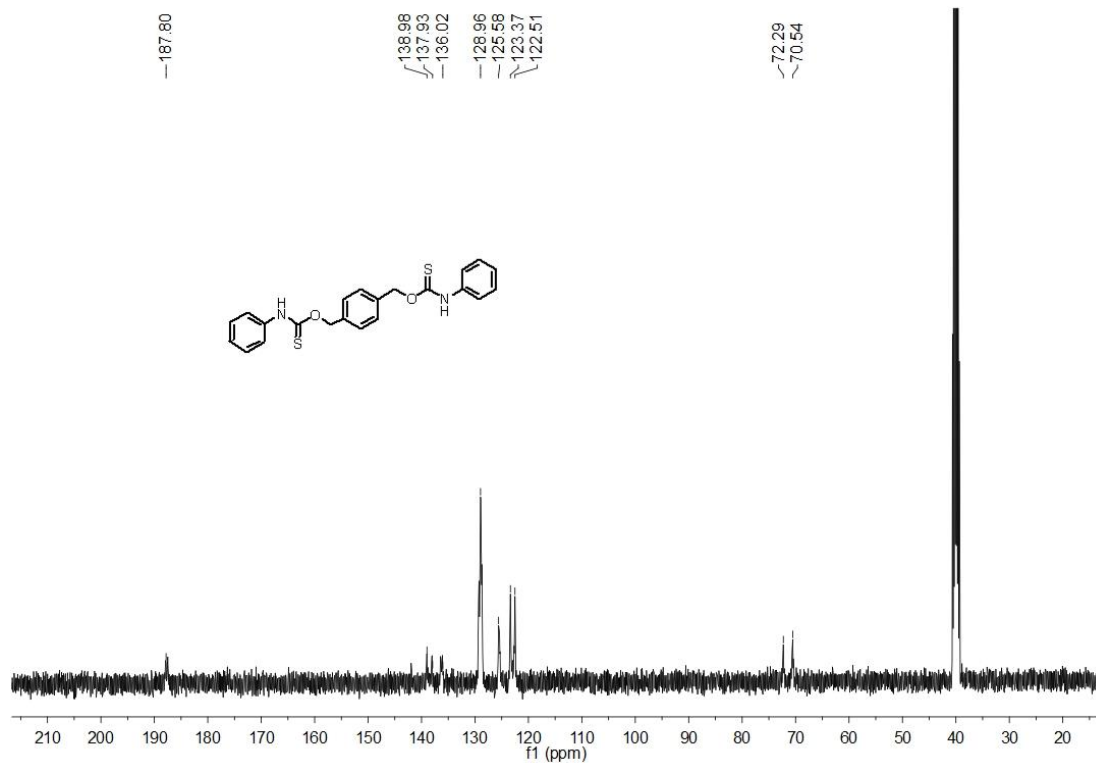

**Fig. S68.**  $^{13}\text{C}$  NMR spectrum of 3pa (100 MHz, DMSO- $d_6$ , 20 °C)



Copies of  $\beta$ -amino alcohols

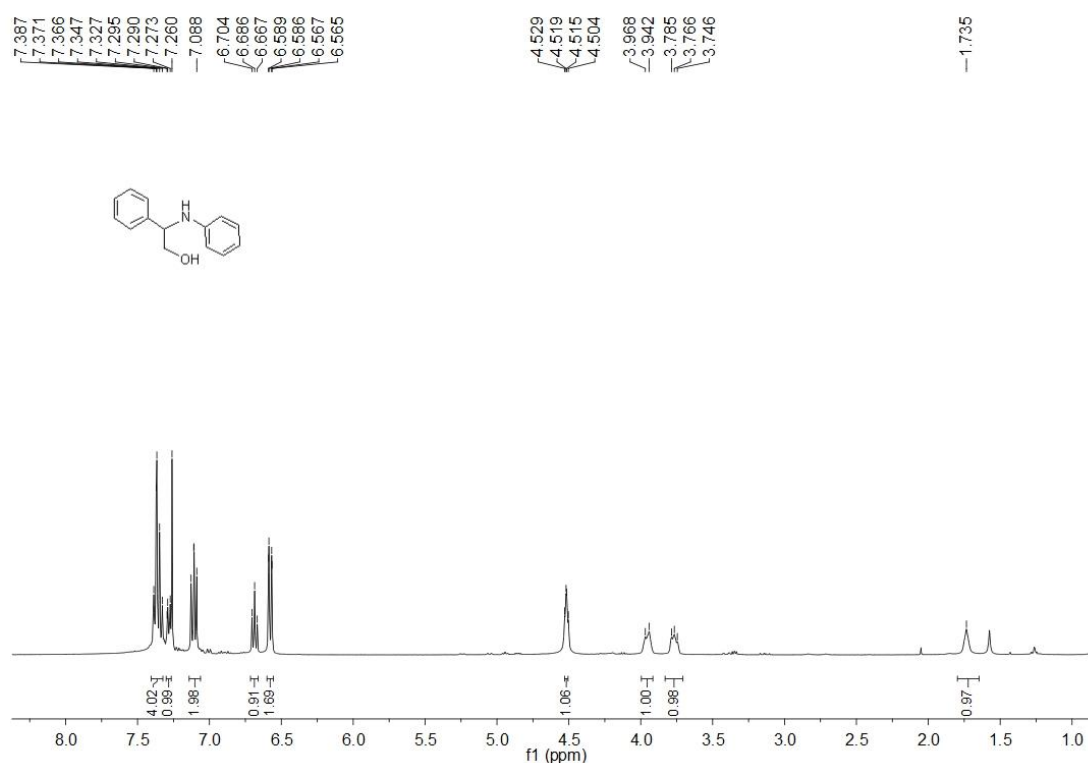

Fig. S69.  $^1\text{H}$  NMR spectrum of **4aa** (400 MHz,  $\text{CDCl}_3$ , 20  $^\circ\text{C}$ )

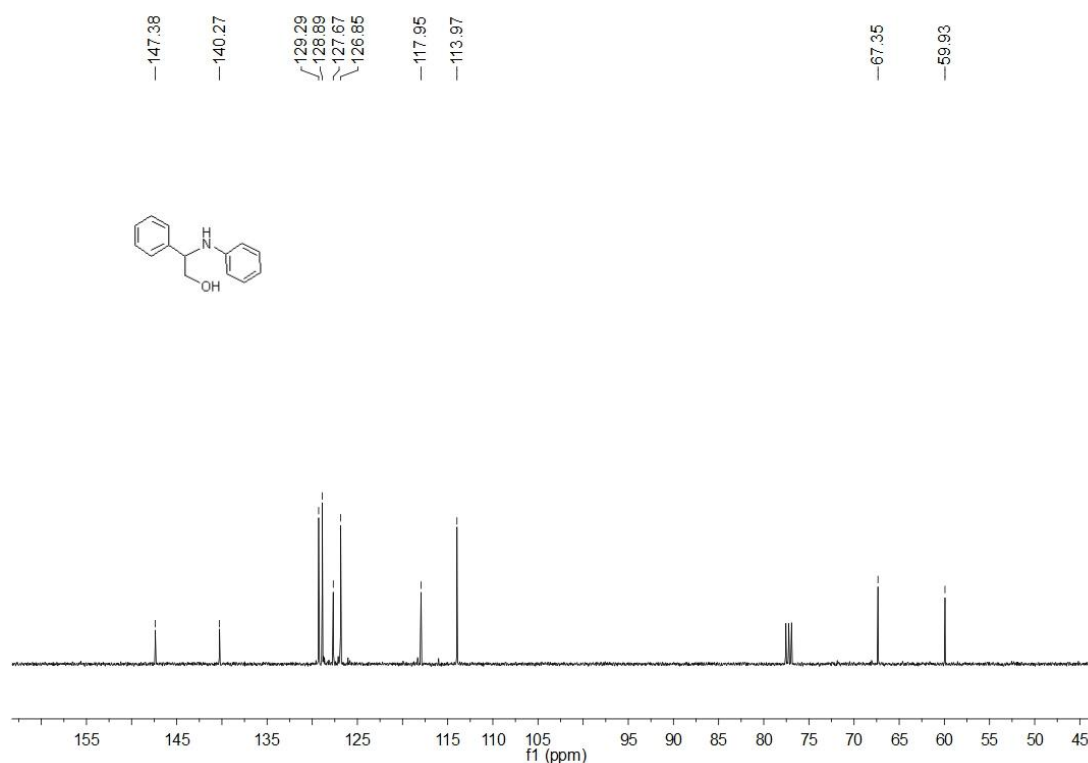

Fig. S70.  $^{13}\text{C}$  NMR spectrum of **4aa** (100 MHz,  $\text{CDCl}_3$ , 20  $^\circ\text{C}$ )

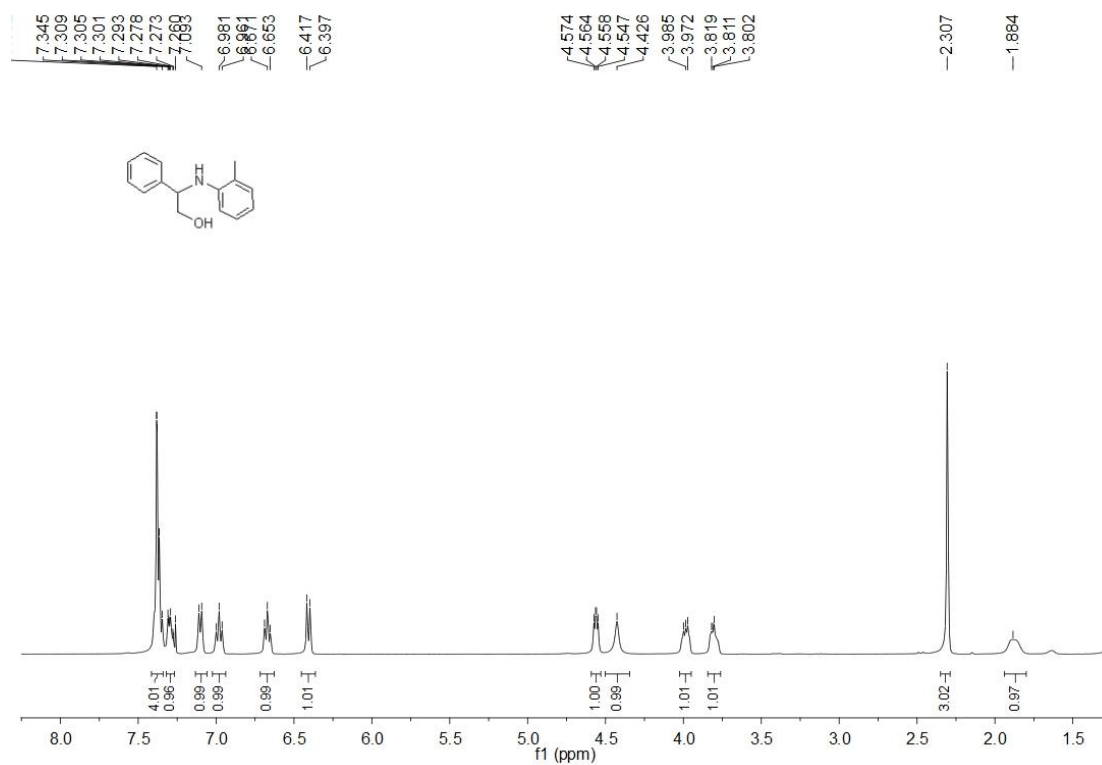

**Fig. S71.** <sup>1</sup>H NMR spectrum of **4ab** (400 MHz, CDCl<sub>3</sub>, 20 °C)

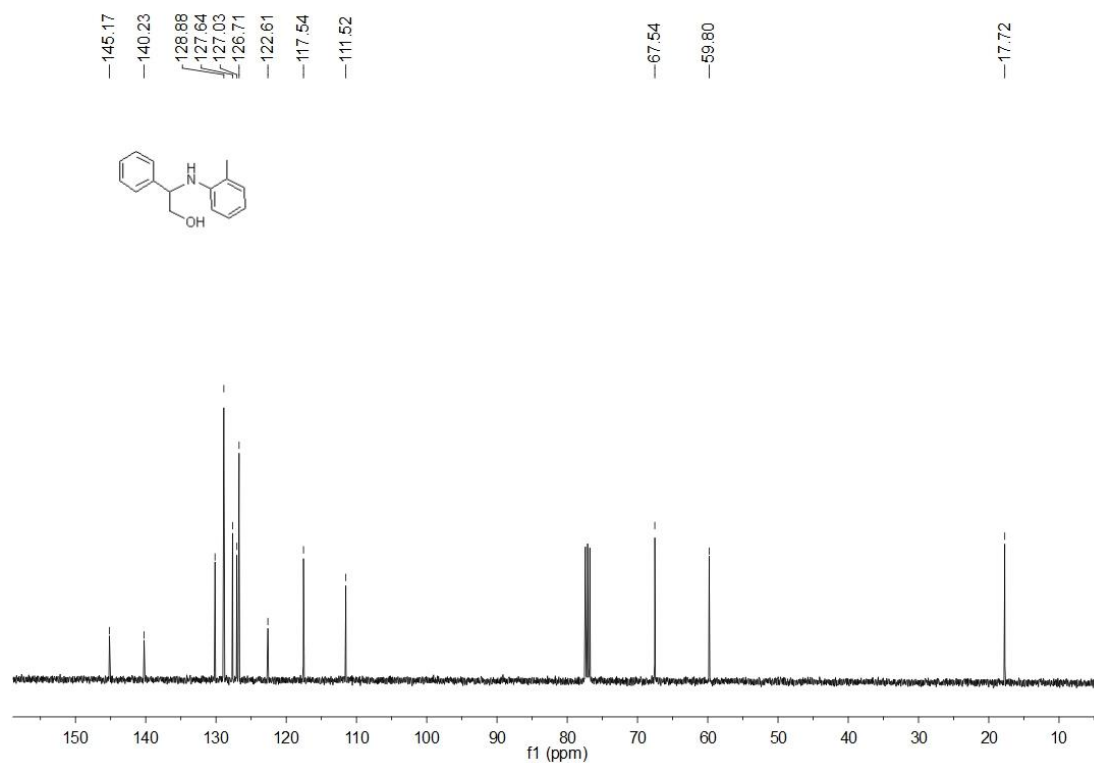

**Fig. S72.** <sup>13</sup>C NMR spectrum of **4ab** (100 MHz, CDCl<sub>3</sub>, 20 °C)

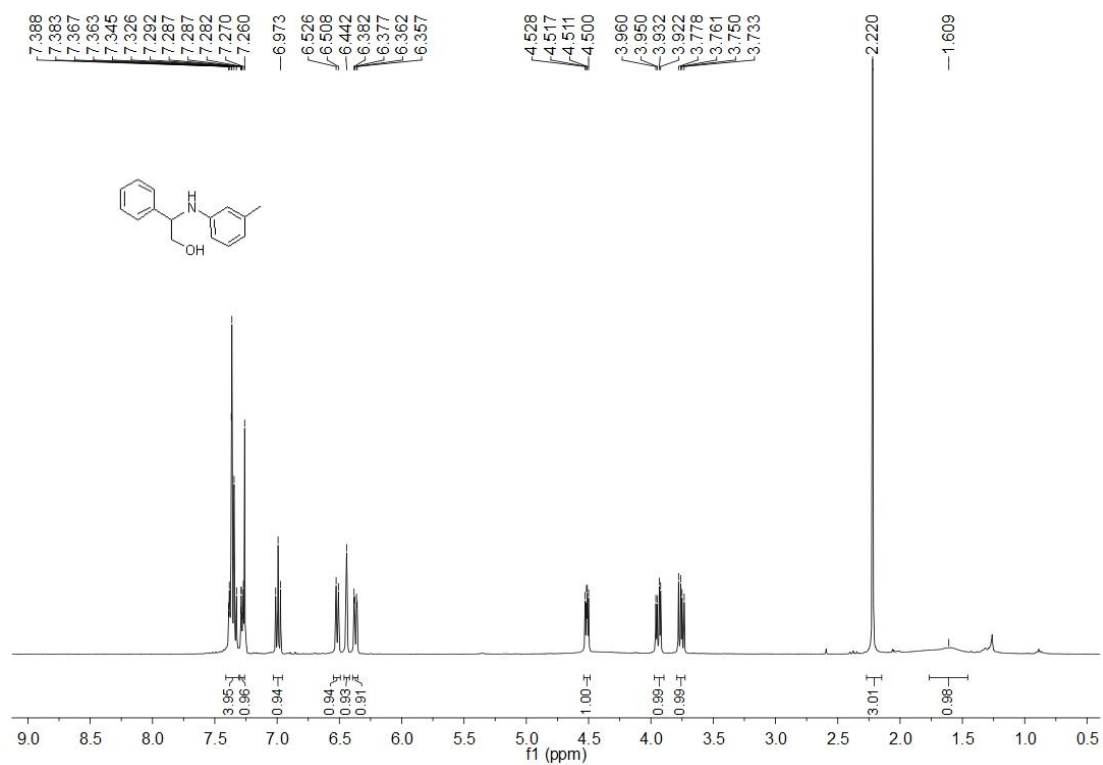

**Fig. S73.** <sup>1</sup>H NMR spectrum of 4ac (400 MHz, CDCl<sub>3</sub>, 20 °C)

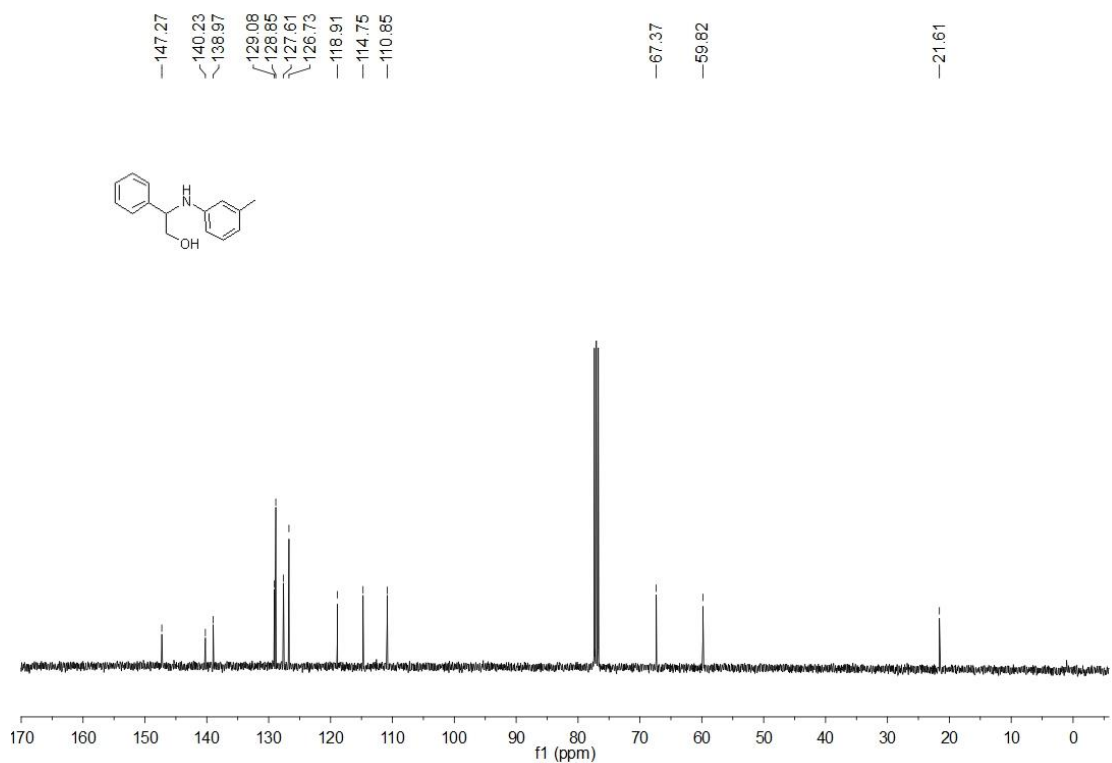

**Fig. S74.** <sup>13</sup>C NMR spectrum of 4ac (100 MHz, CDCl<sub>3</sub>, 20 °C)

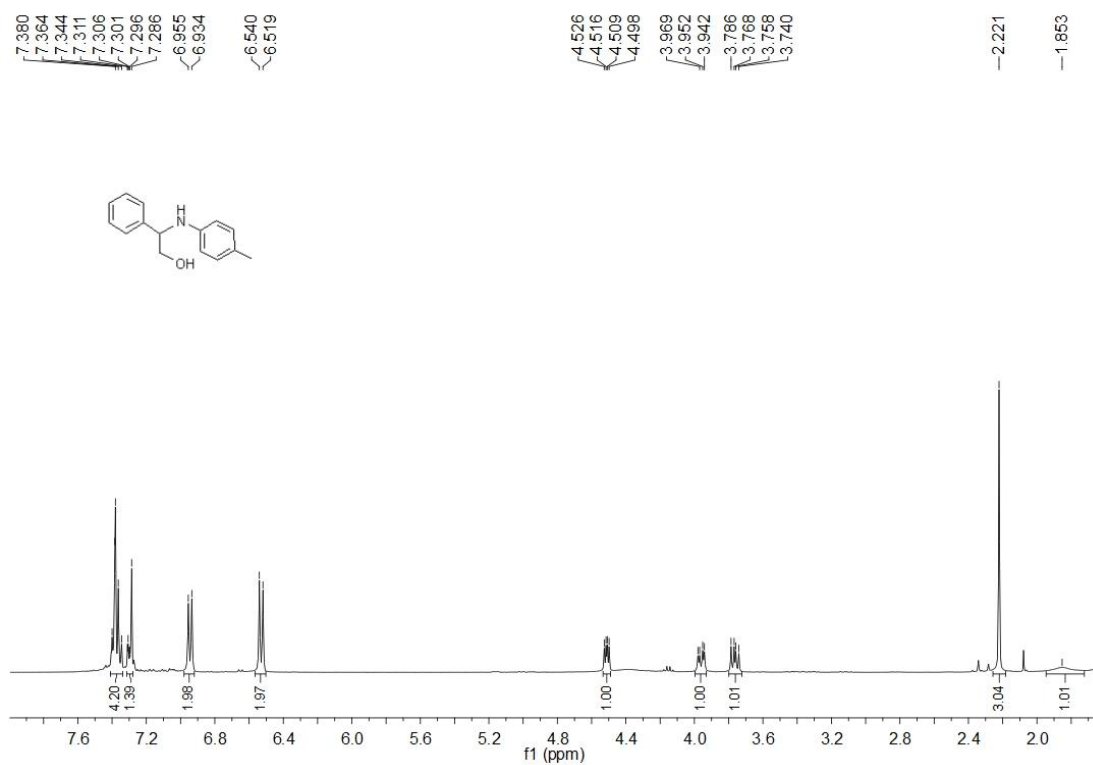

**Fig. S75.** <sup>1</sup>H NMR spectrum of **4ad** (400 MHz, CDCl<sub>3</sub>, 20 °C)

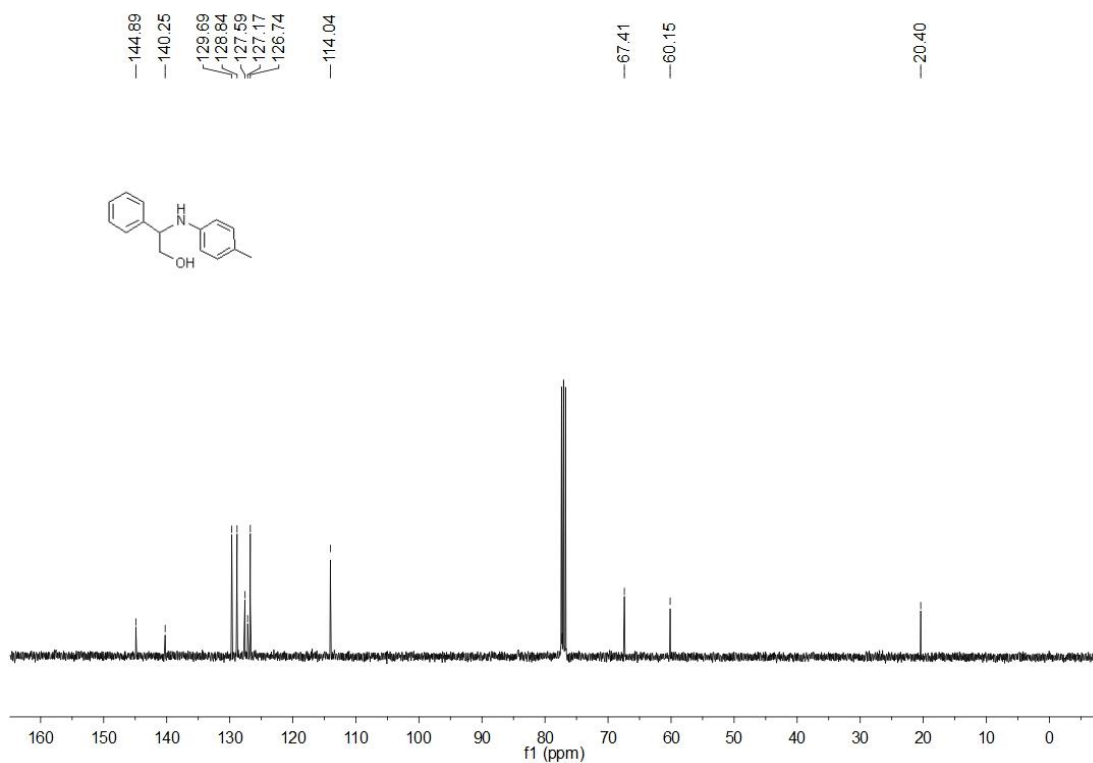

**Fig. S76.** <sup>13</sup>C NMR spectrum of **4ad** (100 MHz, CDCl<sub>3</sub>, 20 °C)

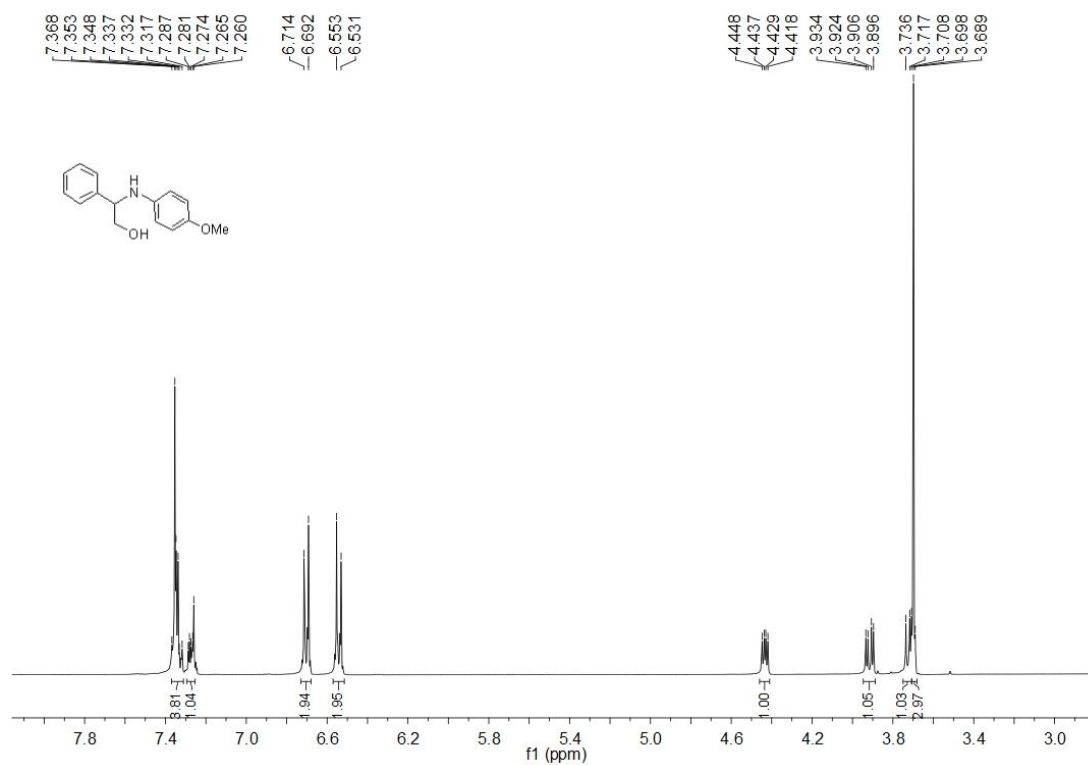

**Fig. S77.** <sup>1</sup>H NMR spectrum of 4ae (400 MHz, CDCl<sub>3</sub>, 20 °C)

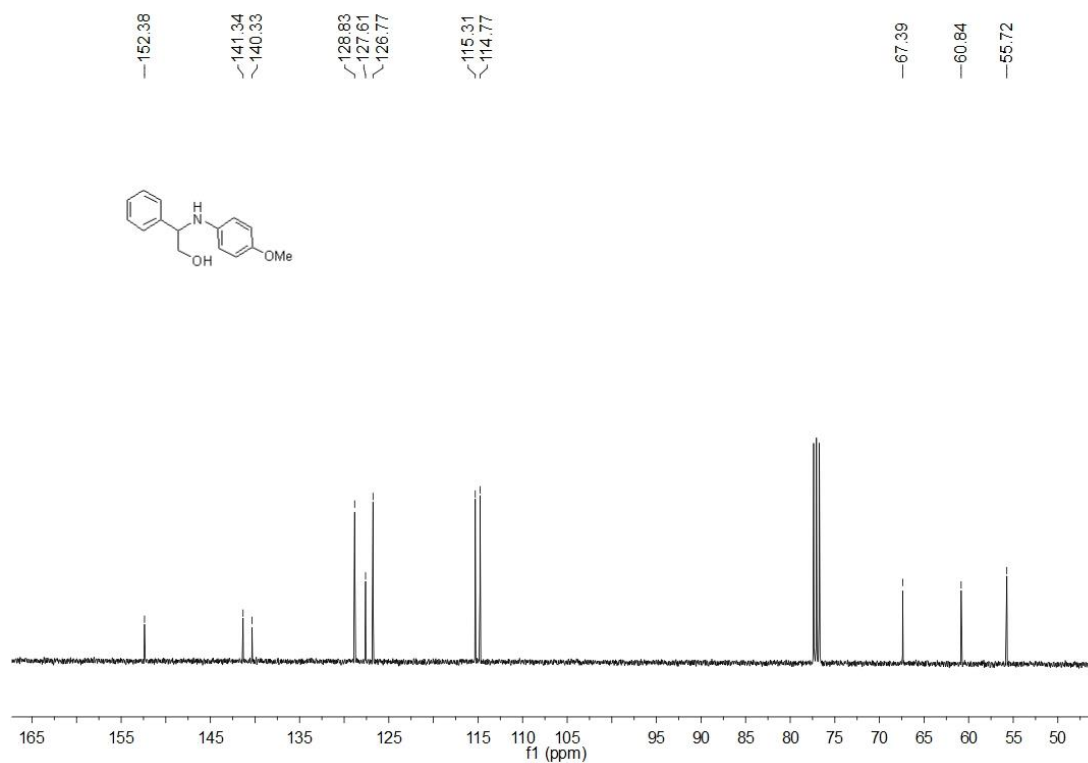

**Fig. S78.** <sup>13</sup>C NMR spectrum of 4ae (100 MHz, CDCl<sub>3</sub>, 20 °C)

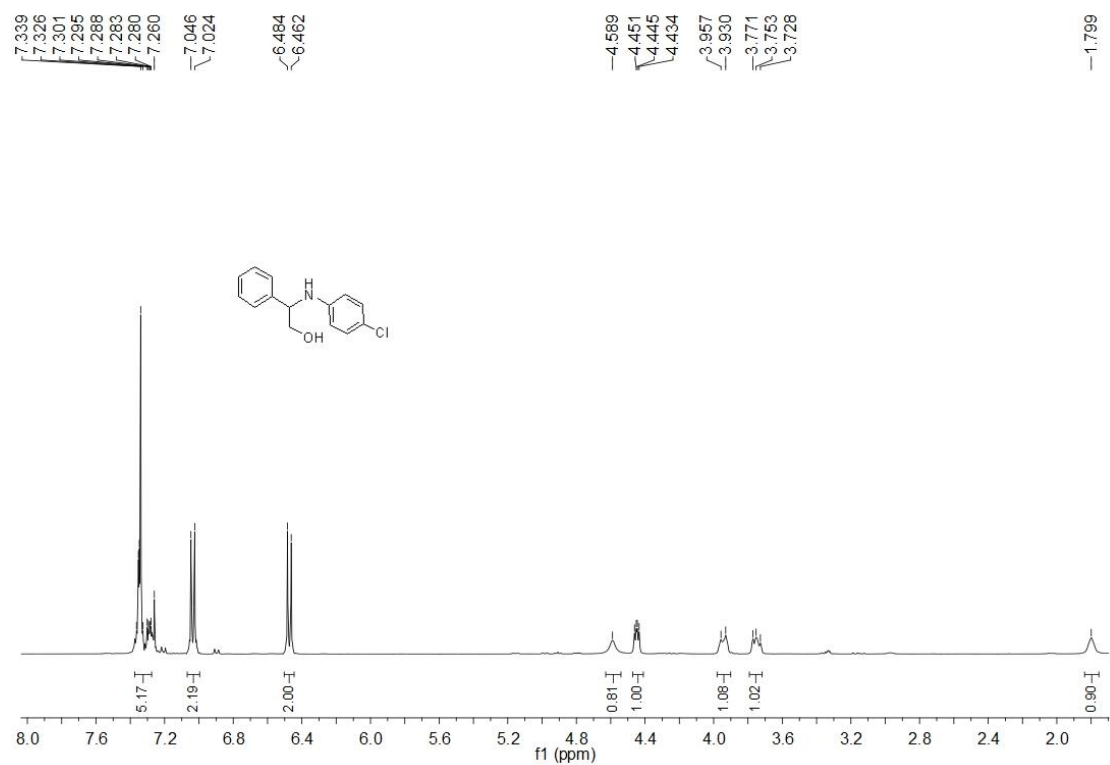

**Fig. S79.** <sup>1</sup>H NMR spectrum of **4af** (400 MHz, CDCl<sub>3</sub>, 20 °C)

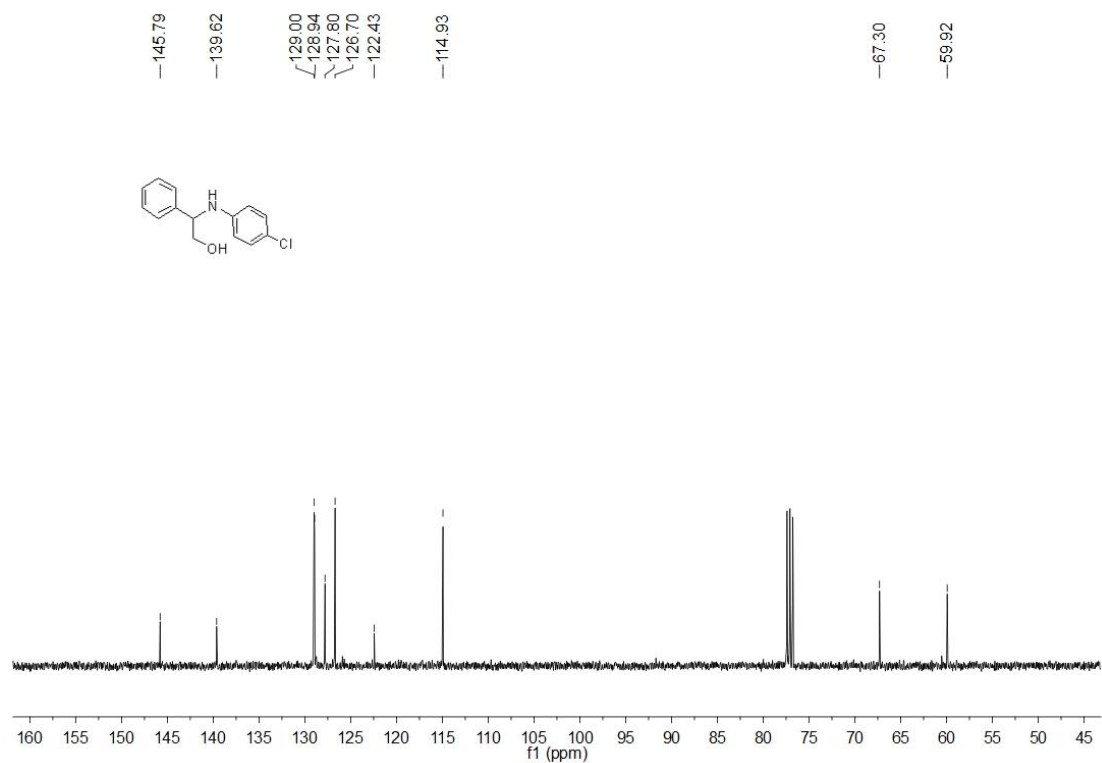

**Fig. S80.** <sup>13</sup>C NMR spectrum of **4af** (100 MHz, CDCl<sub>3</sub>, 20 °C)

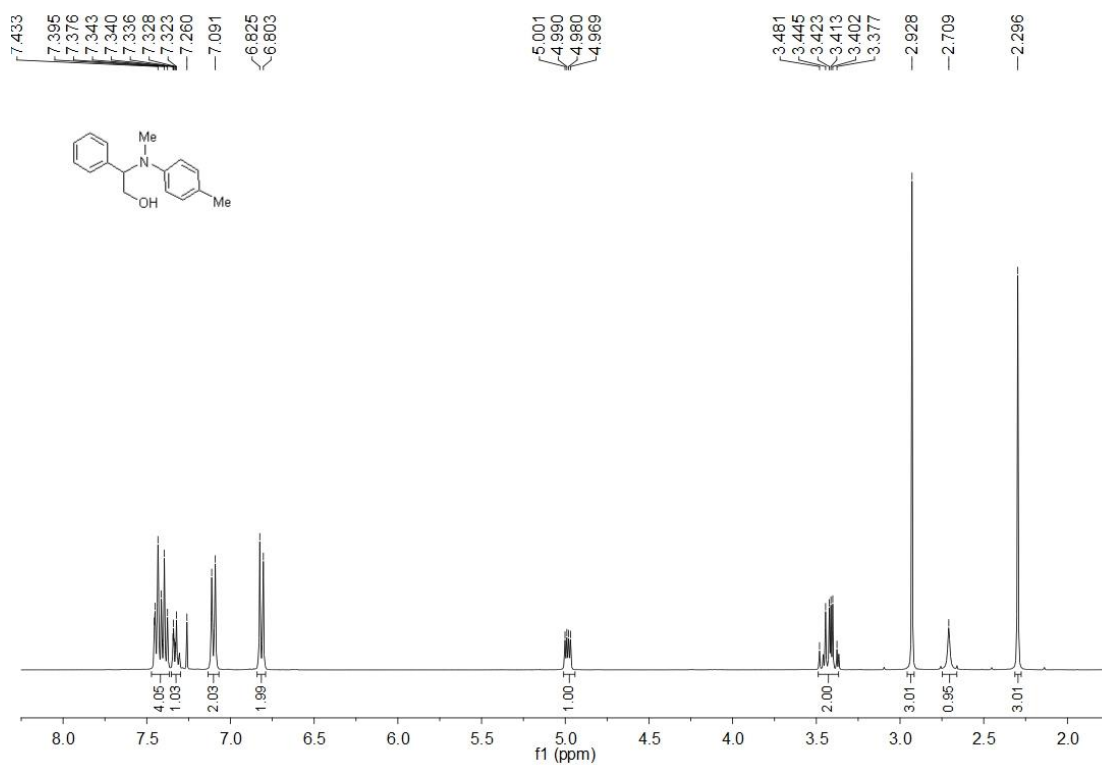

**Fig. S81.** <sup>1</sup>H NMR spectrum of **4ah** (400 MHz, CDCl<sub>3</sub>, 20 °C)

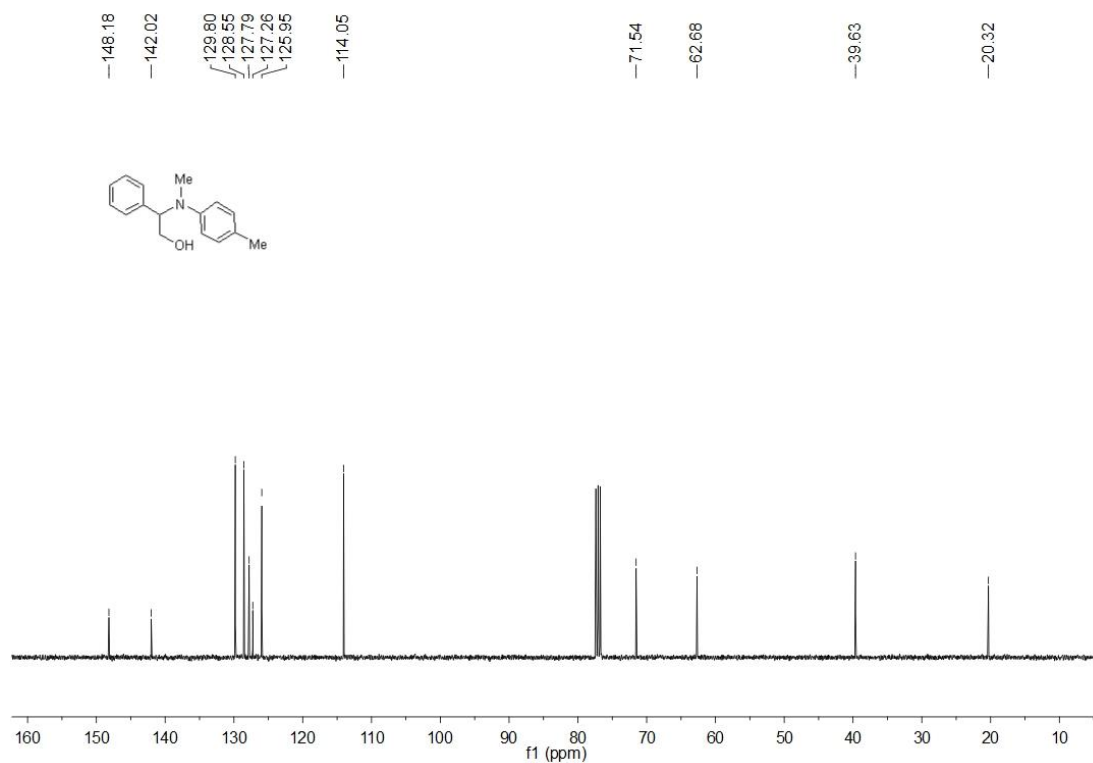

**Fig. S82.** <sup>13</sup>C NMR spectrum of **4ah** (100 MHz, CDCl<sub>3</sub>, 20 °C)

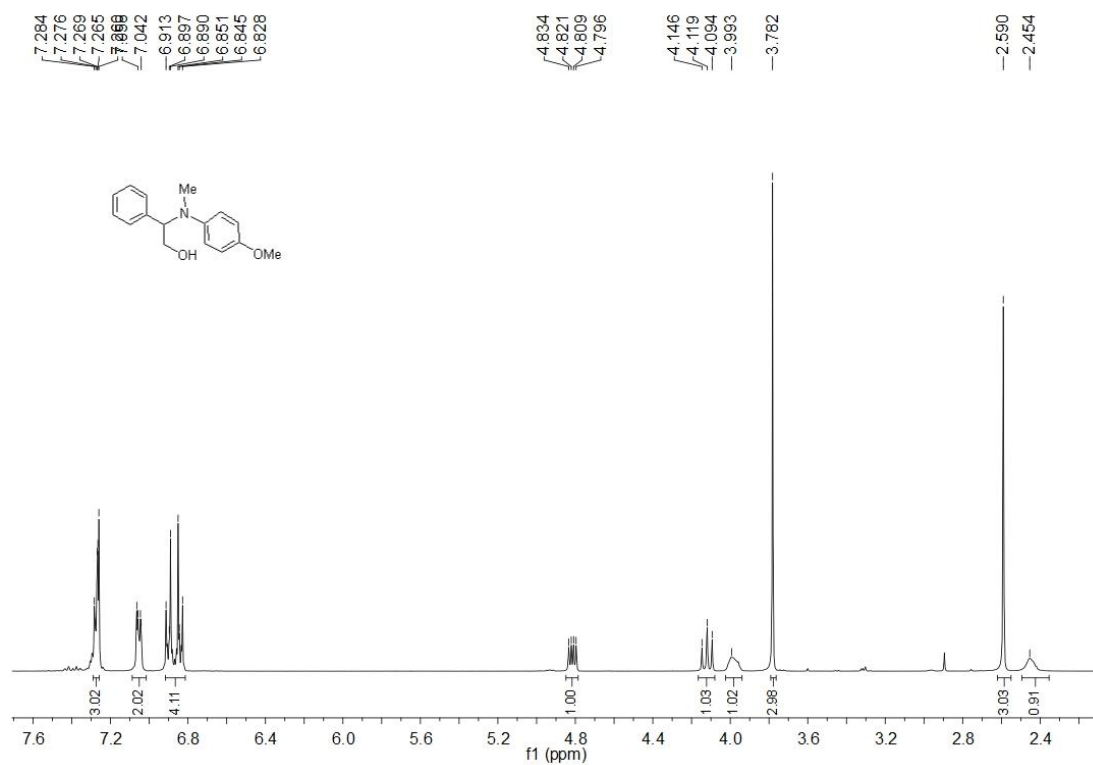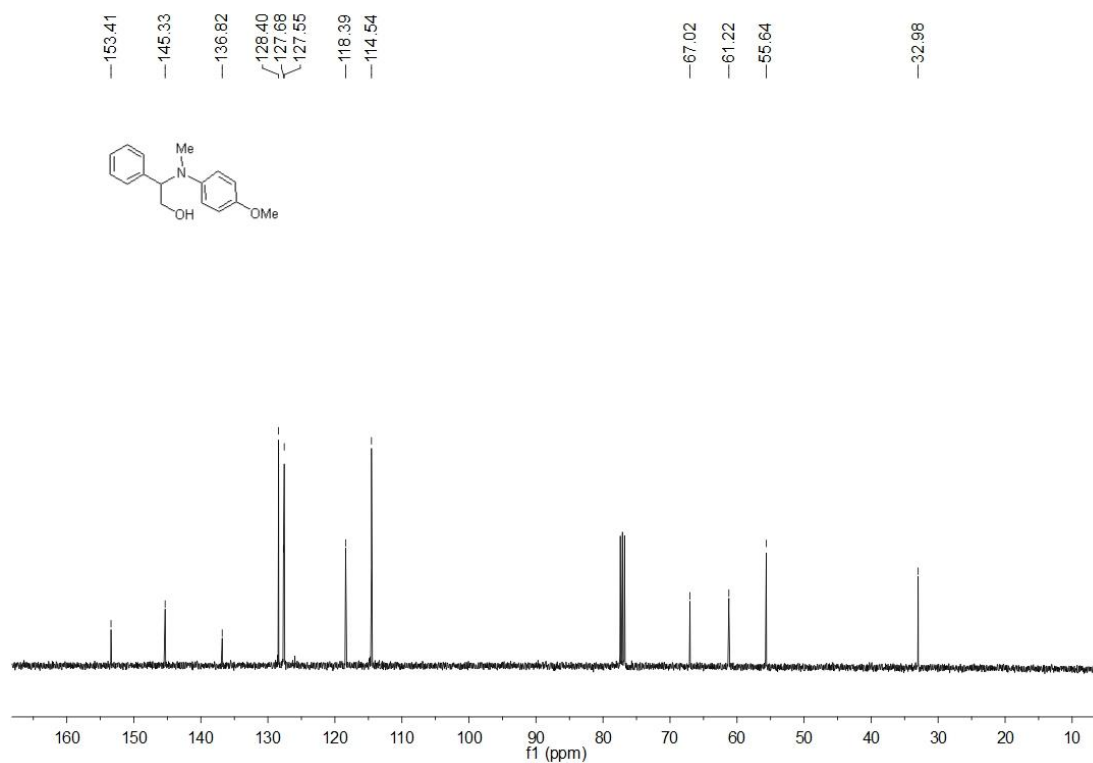



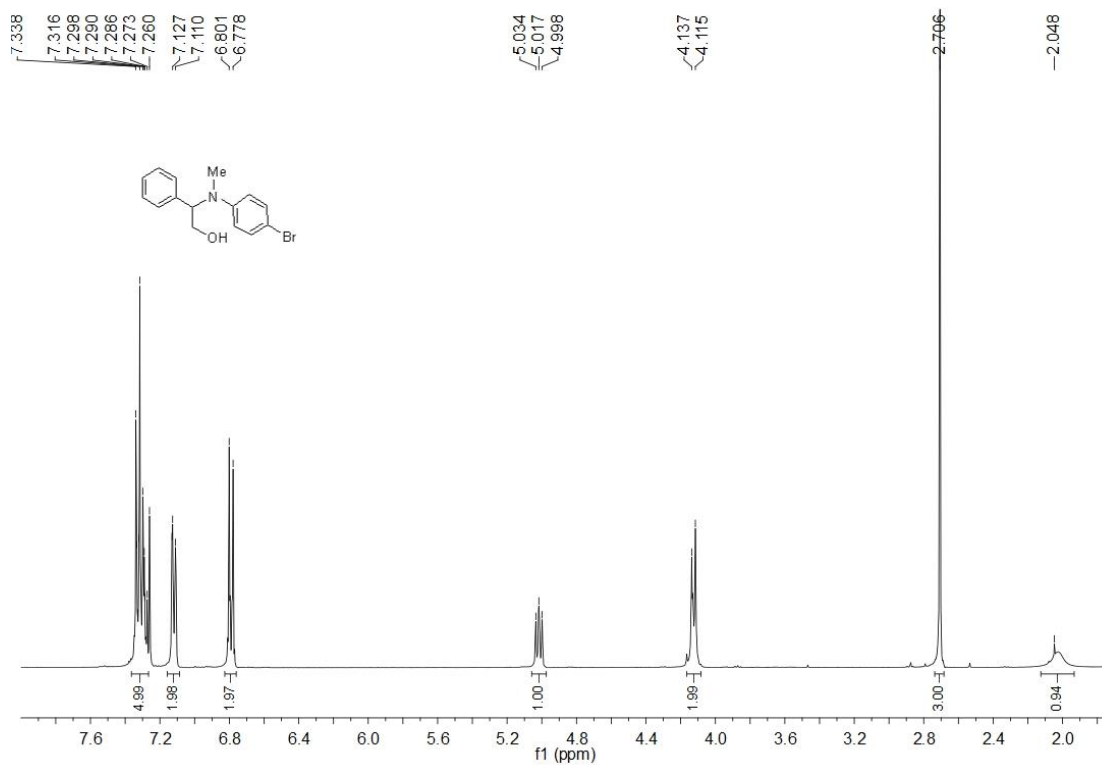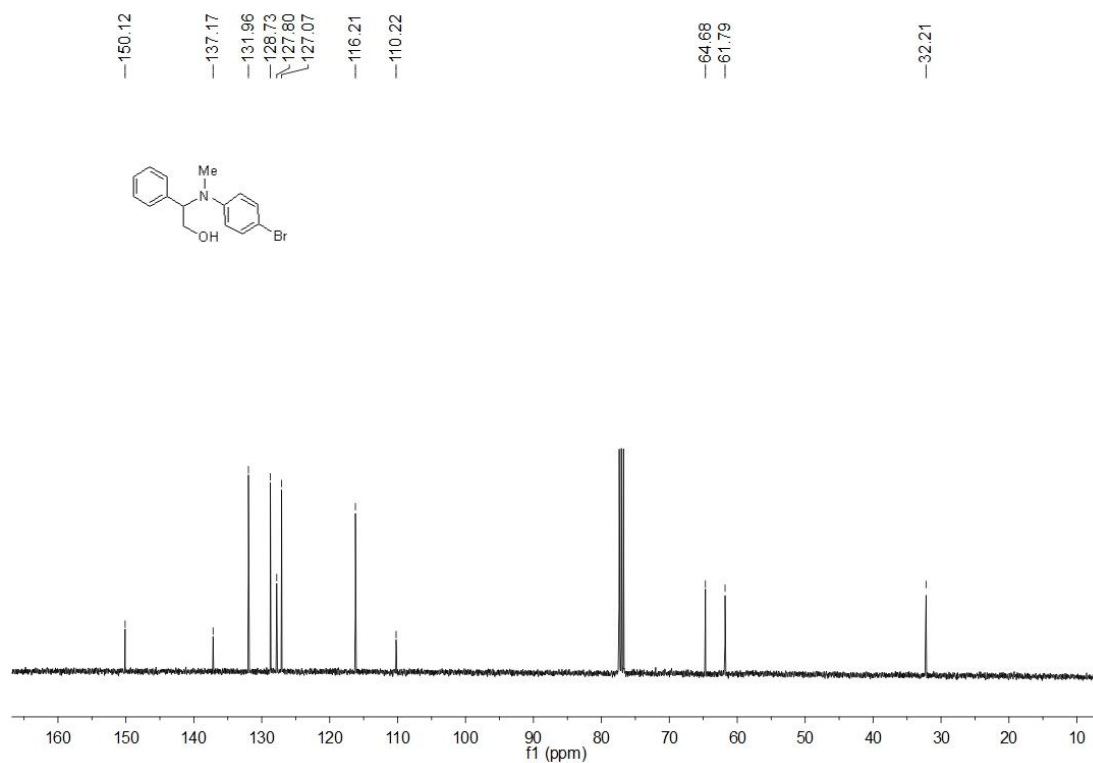

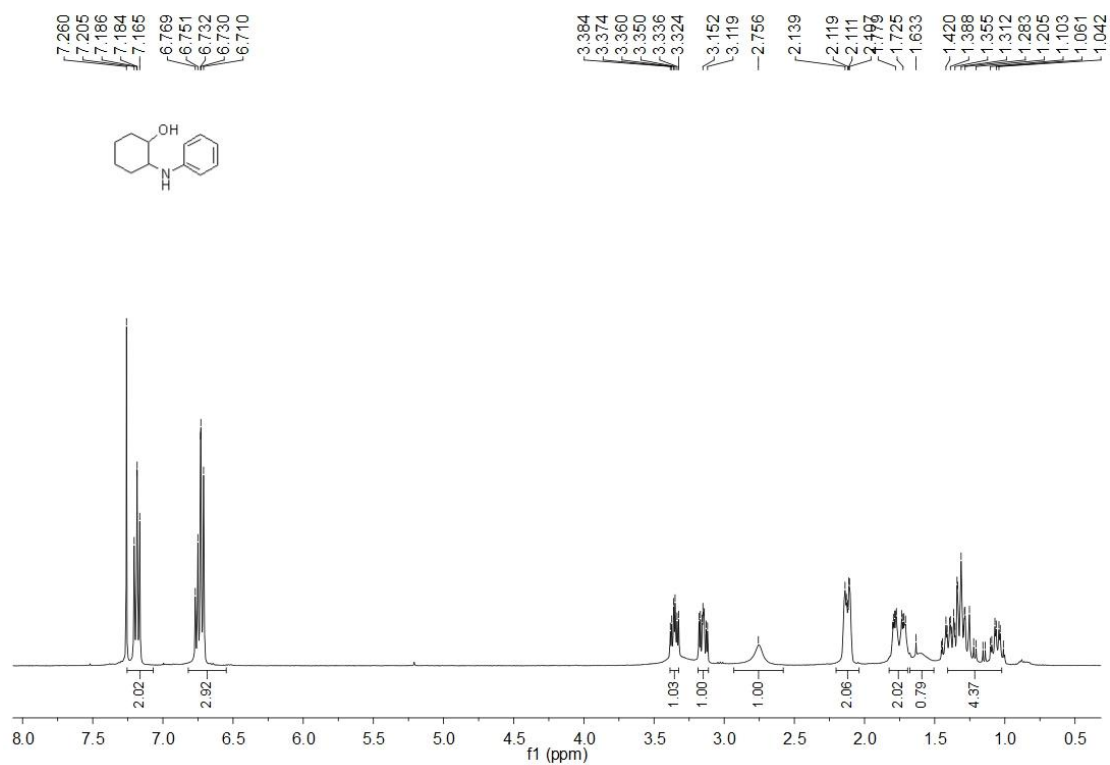

**Fig. S87.** <sup>1</sup>H NMR spectrum of 4ba (400 MHz, CDCl<sub>3</sub>, 20 °C)

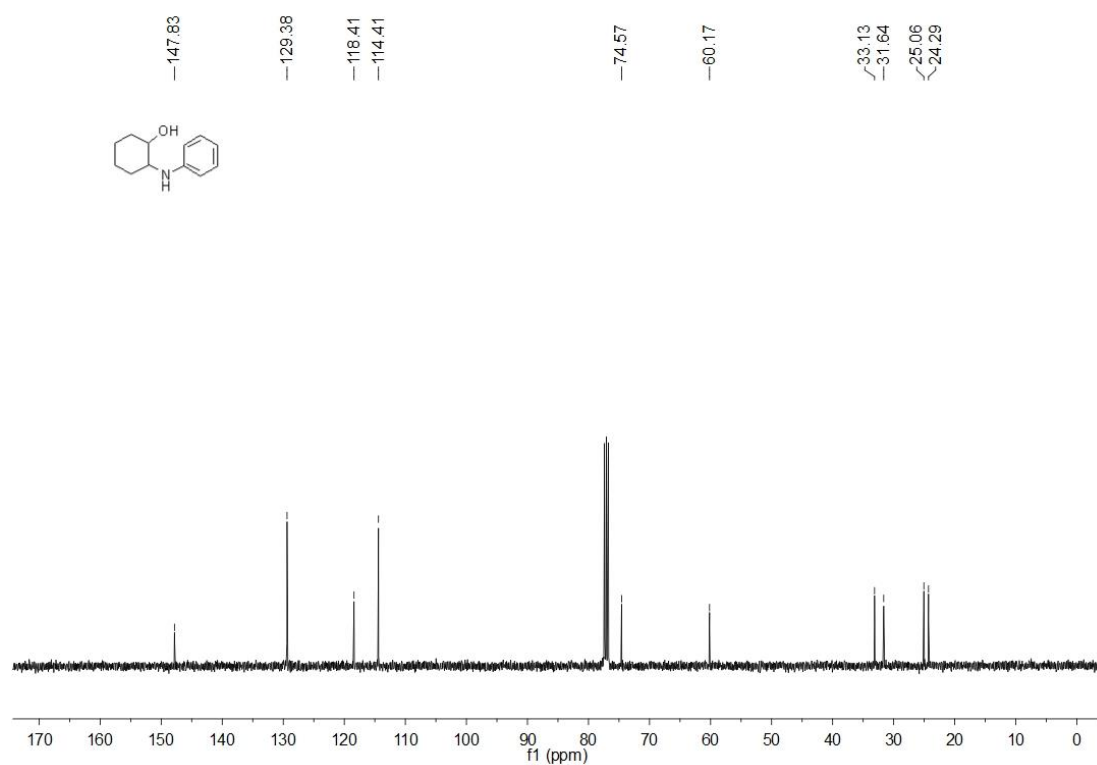

**Fig. S88.** <sup>13</sup>C NMR spectrum of 4ba (100 MHz, CDCl<sub>3</sub>, 20 °C)

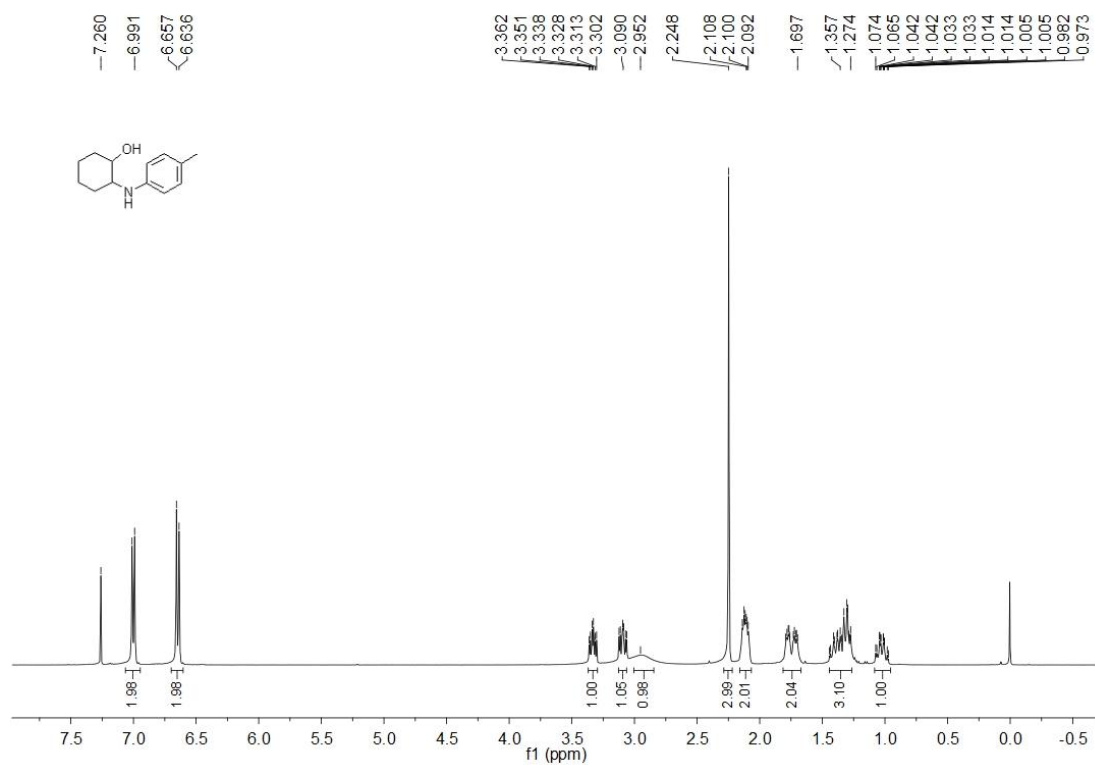

**Fig. S89.** <sup>1</sup>H NMR spectrum of **4bd** (400 MHz, CDCl<sub>3</sub>, 20 °C)

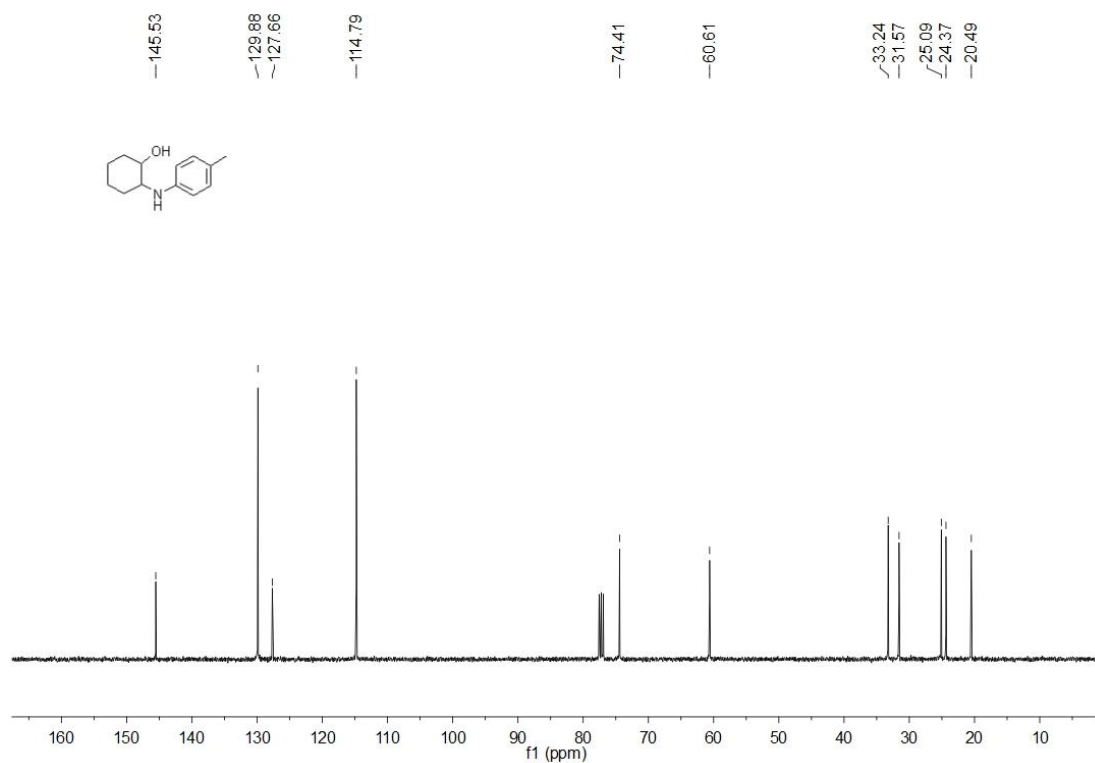

**Fig. S90.** <sup>13</sup>C NMR spectrum of **4bd** (100 MHz, CDCl<sub>3</sub>, 20 °C)

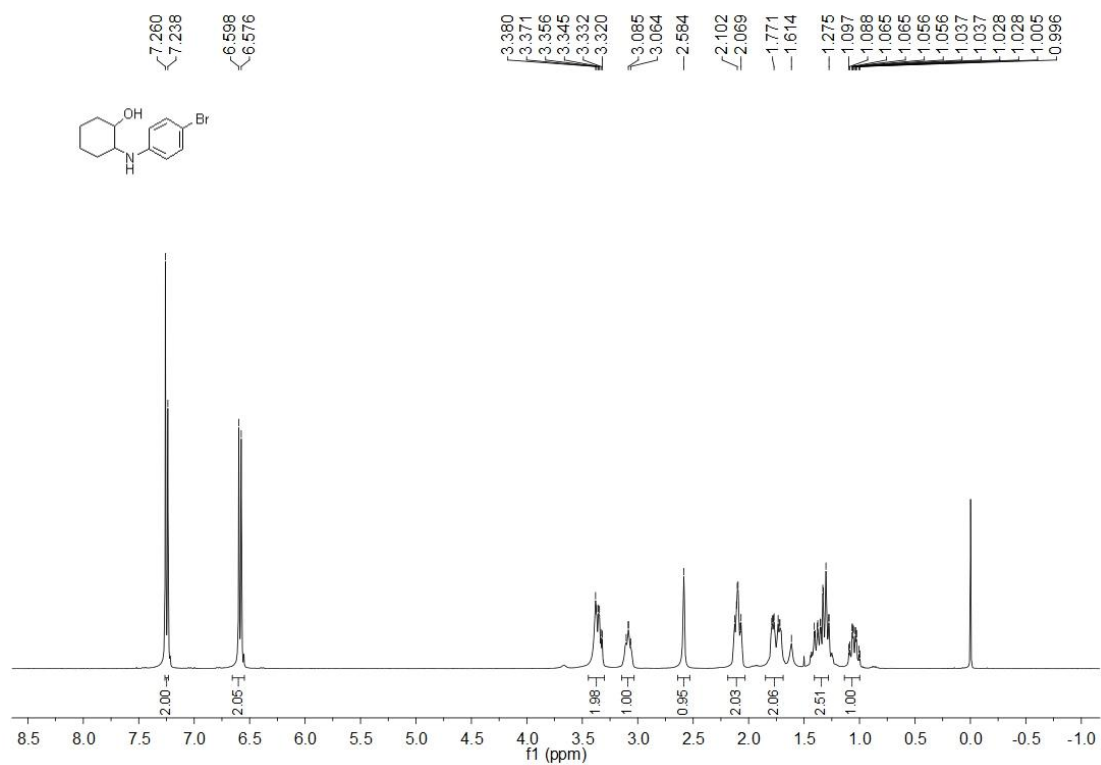

**Fig. S91.** <sup>1</sup>H NMR spectrum of **4bg** (400 MHz, CDCl<sub>3</sub>, 20 °C)

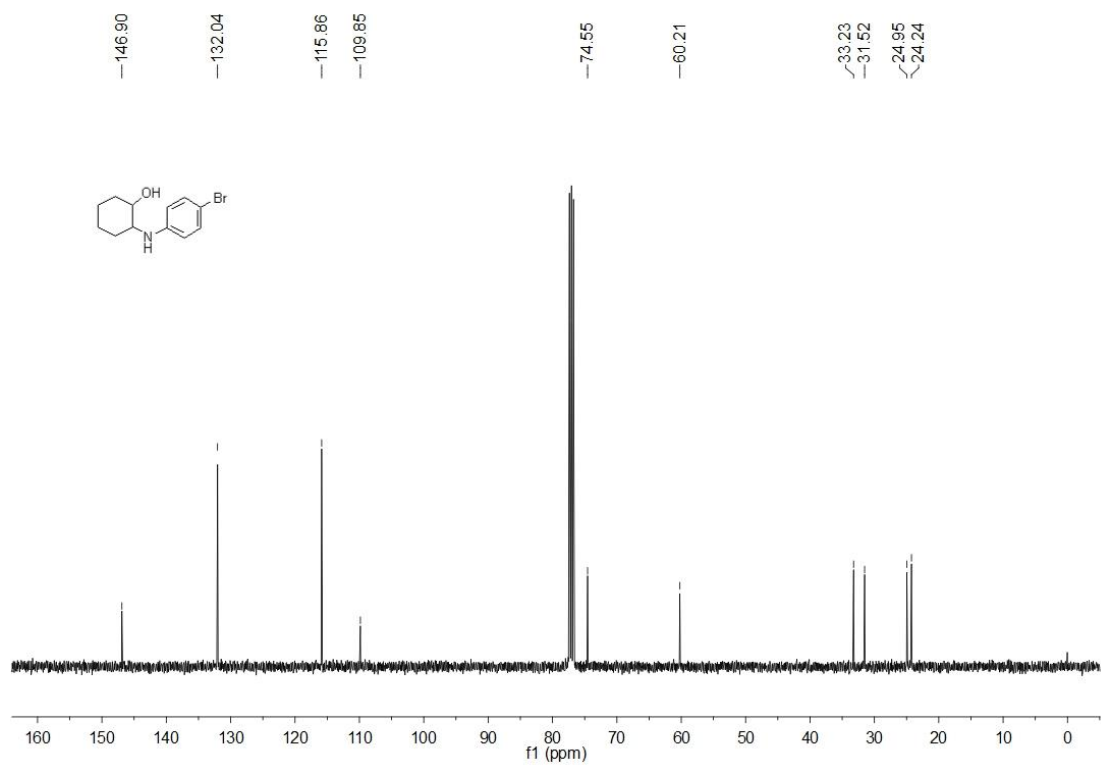

**Fig. S92.** <sup>13</sup>C NMR spectrum of **4bg** (100 MHz, CDCl<sub>3</sub>, 20 °C)

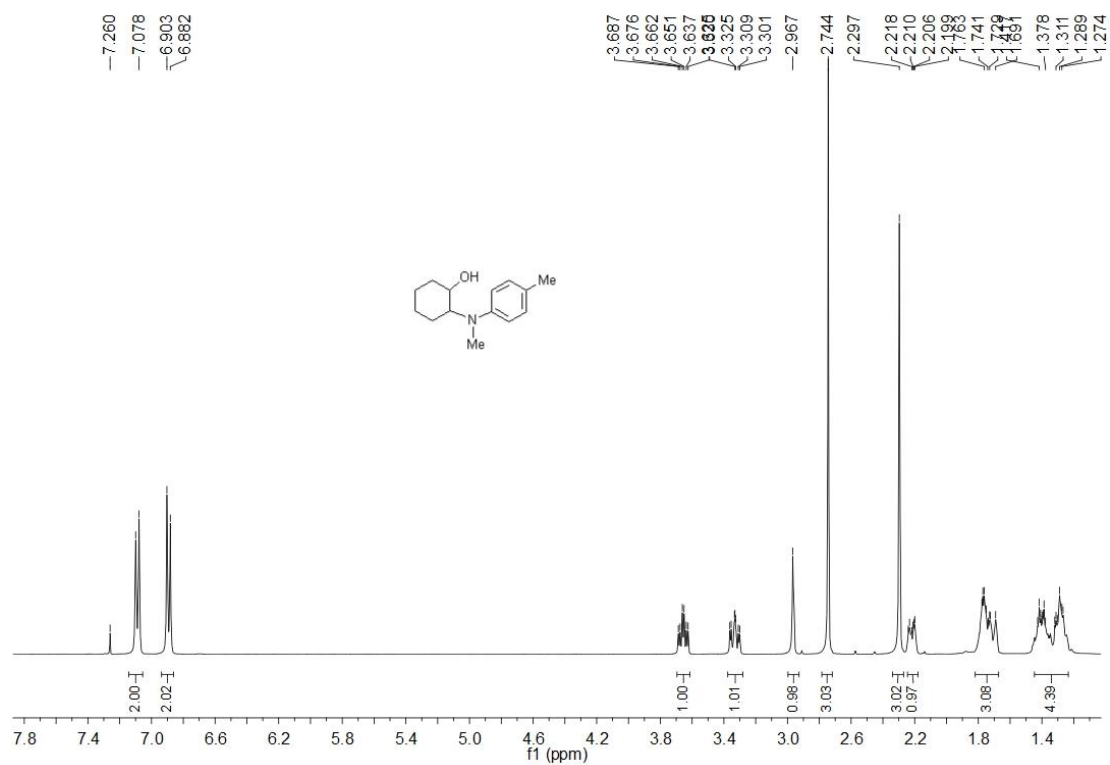

**Fig. S93.** <sup>1</sup>H NMR spectrum of **4bh** (400 MHz, CDCl<sub>3</sub>, 20 °C)

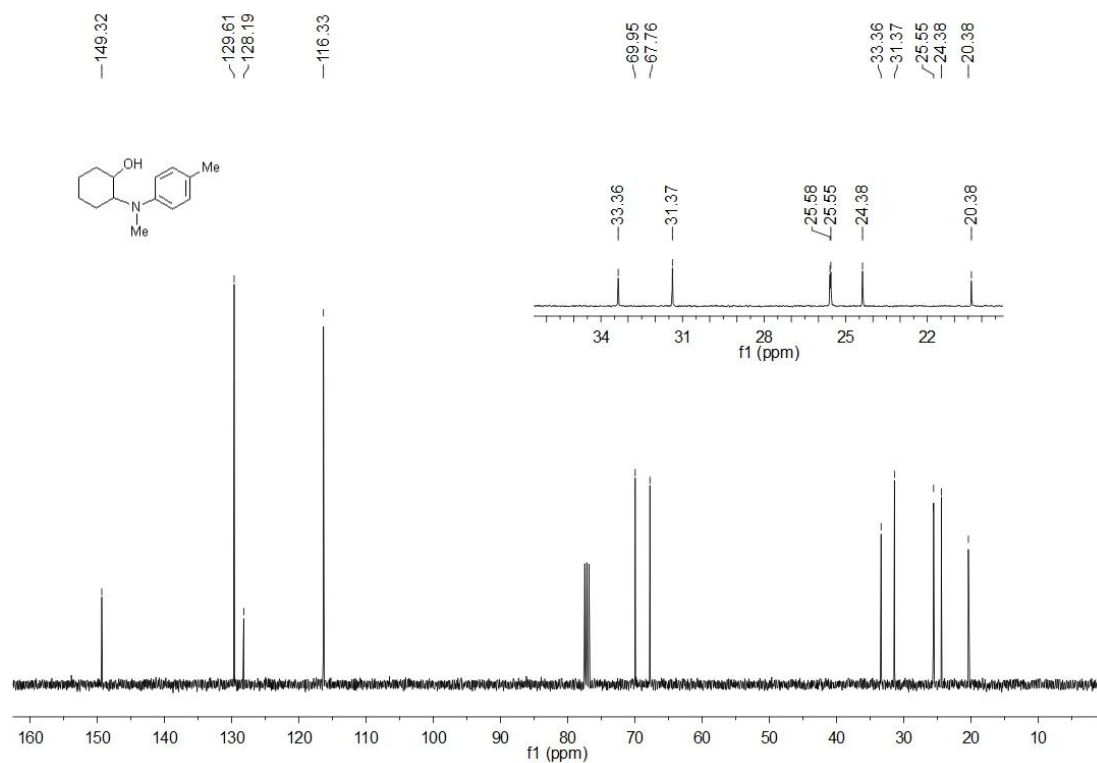

**Fig. S94.** <sup>13</sup>C NMR spectrum of **4bh** (100 MHz, CDCl<sub>3</sub>, 20 °C)

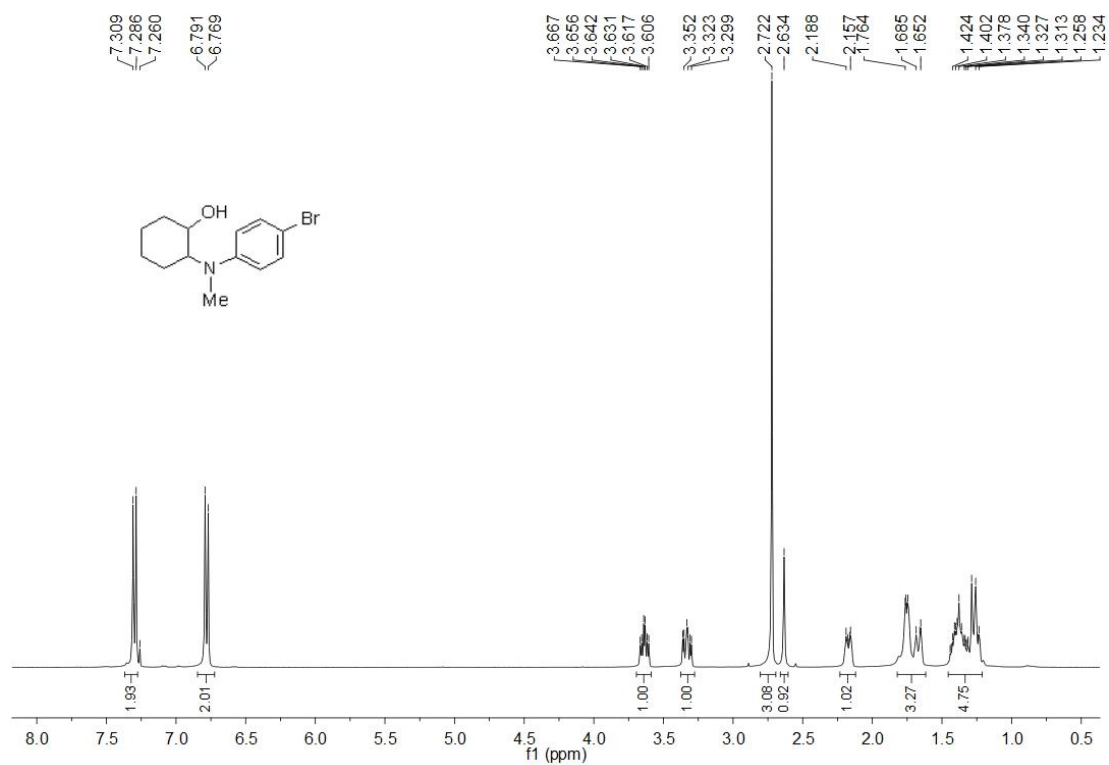

**Fig. S95.** <sup>1</sup>H NMR spectrum of 4bj (400 MHz, CDCl<sub>3</sub>, 20 °C)

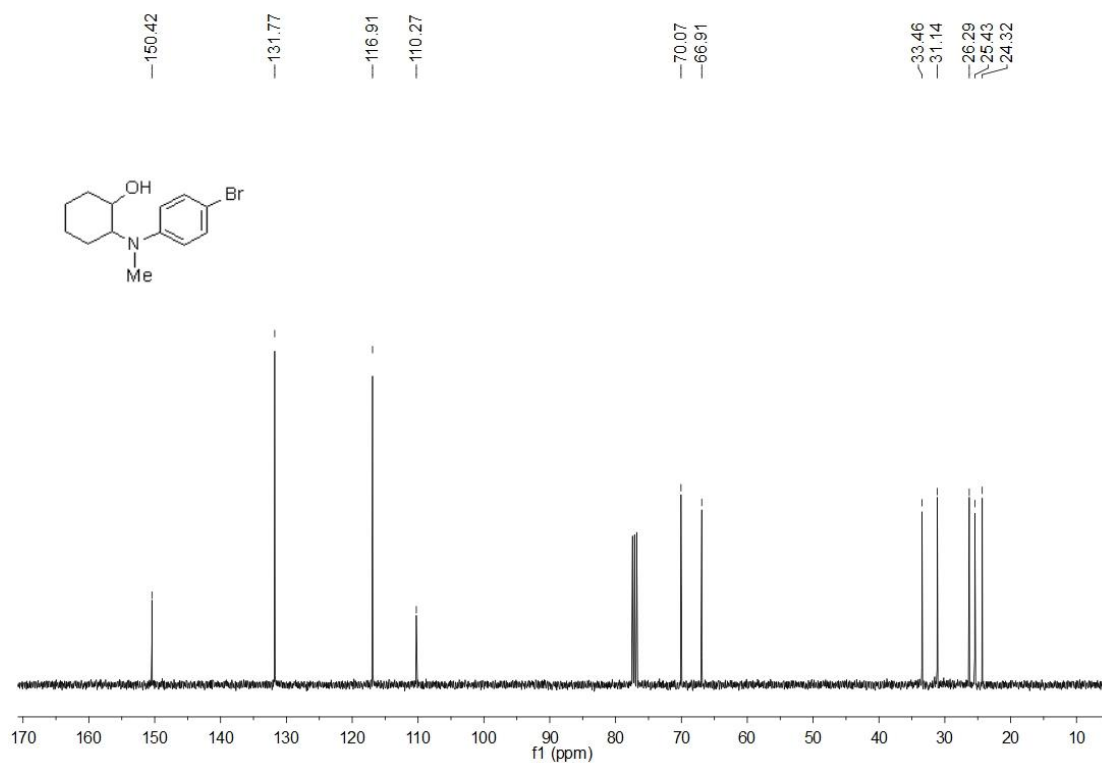

**Fig. S96.** <sup>13</sup>C NMR spectrum of 4bj (100 MHz, CDCl<sub>3</sub>, 20 °C)

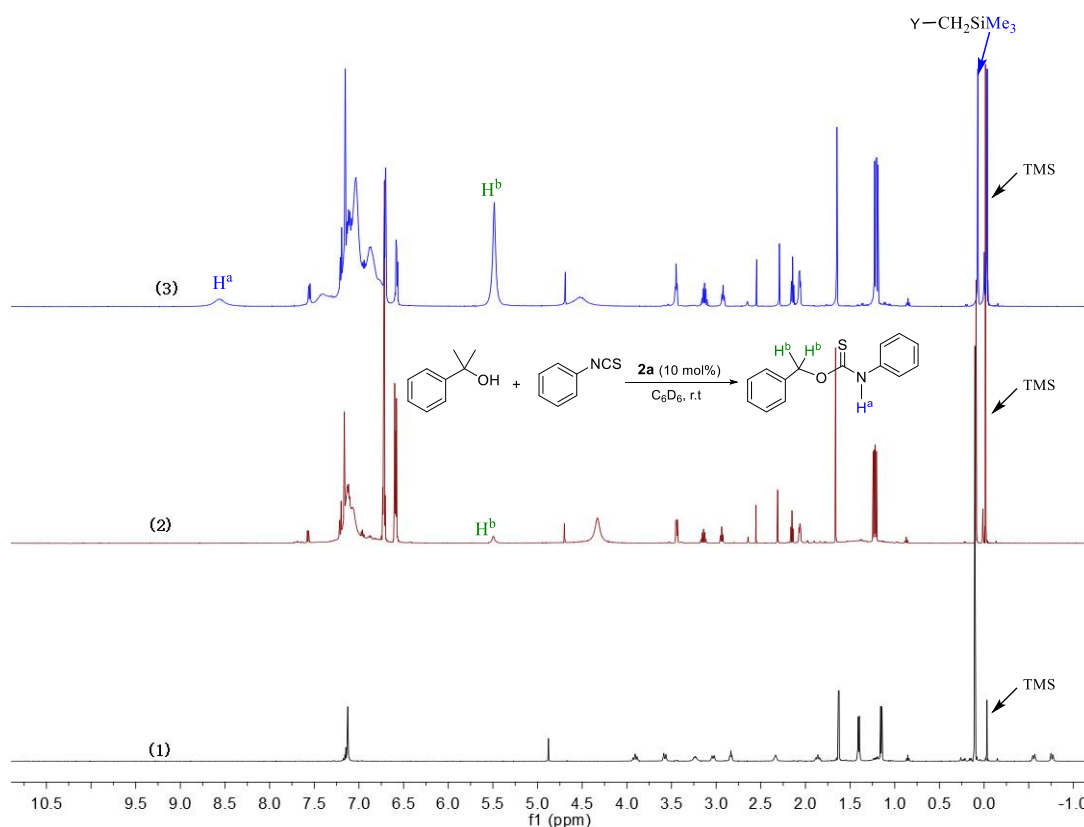

**Fig. S97**  $^1\text{H}$  NMR (500 MHz,  $\text{C}_6\text{D}_6$ ) monitoring the reaction of benzyl alcohol (0.1 mmol) and phenyl isothiocyanate (0.1 mmol) in the presence of 10 mol% of **2a** at room temperature. (1) **2a** in  $\text{C}_6\text{D}_6$ . (2) The catalytic reaction runs 3 h. (3) The catalytic reaction runs 12 h.

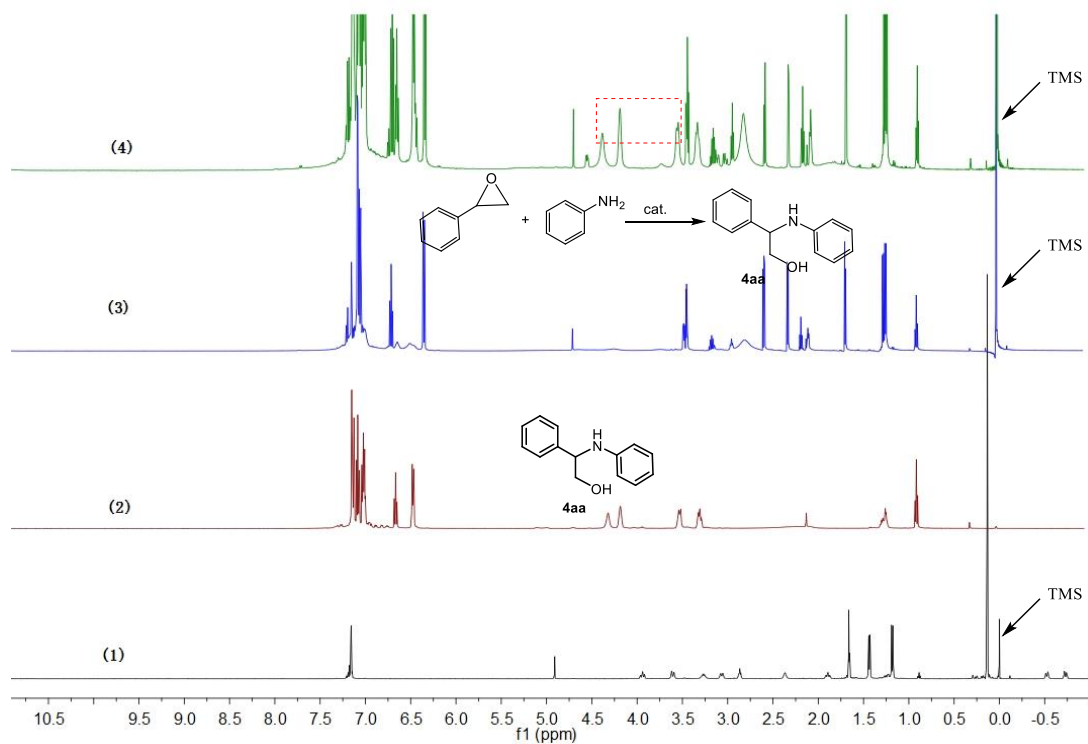

**Fig. S98**  $^1\text{H}$  NMR (500 MHz,  $\text{C}_6\text{D}_6$ ) monitoring the catalytic reaction of styrene oxide (0.2 mmol) and aniline (0.1 mmol) in the presence of 10 mol% of **2a** at room temperature. (1) **2a** in  $\text{C}_6\text{D}_6$ . (2) **4aa** in  $\text{C}_6\text{D}_6$ . (3) The catalytic reaction runs 20 min. (4) The catalytic reaction runs 7 h.

### Note after first publication

This electronic supplementary information replaces the version published on 28th July 2022, which contained errors in the crystallographic data for compound 5a.

### References

- (1) A. R. Sardarian, I. D. Inaloo and M. Zangiabadi, *New J. Chem.*, 2019, **43**, 8557–8565.
- (2) D. Li, J. Wang, S. Yu, S. Ye, W. Zou, H. Zhang and J. Chen, *Chem. Commun.*, 2020, **56**, 2256–2259.
- (3) J. Du, S. Zhou, X. Zhang, L. Zhang, P. Cui, Z. Huang, W. Yun, X. Zhu and S. Wang, *Appl. Organomet. Chem.*, 2019, **34**, e5275.
- (4) K. Tanaka, M. Kinoshita, J. Kayahara, Y. Uebayashi, K. Nakaji, M. Morawiak and Z. Urbanczyk-Lipkowskab, *RSC Adv.*, 2018, **8**, 28139–28146.
- (5) P. Ji, X. Feng, P. Oliveres, Z. Li, A. Murakami, C. Wang and W. Lin, *J. Am. Chem. Soc.*, 2019, **141**, 14878–14888.
